# Supplementary material for: CarcinoPred-EL: Novel models for predicting the carcinogenicity of chemicals using molecular fingerprints and ensemble learning methods
Source: PubMed Central journal article supplement (PMC5437031; doi:10.1038/s41598-017-02365-0), 2017-05-18
Supplement: 41598_2017_2365_MOESM1_ESM.pdf [file 41598_2017_2365_MOESM1_ESM.pdf]

# **CarcinoPred-EL: Novel models for predicting the carcinogenicity of chemicals using molecular fingerprints and ensemble learning methods**

Li Zhang<sup>1,2, ¶</sup>, Haixin Ai<sup>1,2,3, ¶</sup>, Wen Chen<sup>4</sup>, Zimo Yin<sup>4</sup>, Huan Hu<sup>1</sup>, Junfeng Zhu<sup>1</sup>, Jian Zhao<sup>1</sup>, Qi Zhao<sup>2,5</sup>, Hongsheng Liu<sup>1,2,3,\*</sup>

<sup>1</sup> School of Life Science, Liaoning University, Shenyang, 110036, China

<sup>2</sup> Research Center for Computer Simulating and Information Processing of Bio-macromolecules of Liaoning Province, Shenyang, 110036, China

<sup>3</sup> Engineering Laboratory for Molecular Simulation and Designing of Drug Molecules of Liaoning, Shenyang, 110036, China

<sup>4</sup> School of Information, Liaoning University, Shenyang, 110036, China

<sup>5</sup> School of Mathematics, Liaoning University, Shenyang, 110036, China

\* Corresponding author: Hongsheng Liu, E-mail: liuhongsheng@lnu.edu.cn Tel: +86-24-62202280

Fax: +86-24-62202280

¶ These authors contributed equally to this work.

**Supplementary Table S1:** List of 330 potentially carcinogenic drugs along with their predicted probabilities

| DrugBank ID | CAS Number | Name                                                                          | Probabilities |      |         |
|-------------|------------|-------------------------------------------------------------------------------|---------------|------|---------|
|             |            |                                                                               | RF            | SVM  | XGBoost |
| DB00262     | 154-93-8   | Carmustine                                                                    | 0.87          | 0.8  | 0.96    |
| DB09158     | 72-57-1    | Trypan blue                                                                   | 0.91          | 0.78 | 0.95    |
| DB00614     | 67-45-8    | Furazolidone                                                                  | 0.85          | 0.73 | 0.94    |
| DB01206     | 13010-47-4 | Lomustine                                                                     | 0.78          | 0.71 | 0.91    |
| DB04106     | -          | Fotemustine                                                                   | 0.74          | 0.71 | 0.89    |
| DB01260     | 638-94-8   | Desonide                                                                      | 0.83          | 0.73 | 0.87    |
| DB03035     | -          | 1,8-Di-Hydroxy-4-Nitro-Anthraquinone                                          | 0.73          | 0.72 | 0.85    |
| DB00288     | 51022-69-6 | Amcinonide                                                                    | 0.73          | 0.69 | 0.84    |
| DB02636     | -          | 9-Hydroxy-8-Methoxy-6-Nitro-Phenanthrol [3,4-D][1,3]Dioxole-5-Carboxylic Acid | 0.69          | 0.65 | 0.83    |
| DB07983     | -          | 1-(4-IODOBENZOYL)-5-METHOXY-2-METHYL INDOLE-3-ACETIC ACID                     | 0.7           | 0.64 | 0.82    |
| DB00591     | 67-73-2    | Fluocinolone Acetonide                                                        | 0.82          | 0.73 | 0.81    |
| DB01047     | 356-12-7   | Fluocinonide                                                                  | 0.73          | 0.69 | 0.81    |
| DB00180     | 3385-03-3  | Flunisolide                                                                   | 0.81          | 0.73 | 0.81    |
| DB08594     | -          | TERT-BUTYL 2-CYANO-2-METHYLHYDRAZINECARBOXYLATE                               | 0.64          | 0.69 | 0.8     |
| DB04818     | 54-92-2    | Iproniazid                                                                    | 0.67          | 0.67 | 0.79    |
| DB08318     | -          | 6-(2-phenoxyethoxy)-1,3,5-triazine-2,4-diamine                                | 0.64          | 0.68 | 0.79    |
| DB09251     | 3818-37-9  | Phenoxypropazine                                                              | 0.58          | 0.72 | 0.78    |
| DB04110     | -          | 2-Nitro-P-Cresol                                                              | 0.71          | 0.59 | 0.77    |
| DB01950     | -          | N-(4-Methoxybenzyl)-N'-(5-Nitro-1,3-Thiazol-2-Yl)Urea                         | 0.6           | 0.63 | 0.77    |
| DB02833     | -          | [4-(2-Amino-4-Methyl-Thiazol-5-Yl)-Pyrimidin-2-Yl]-(3-Nitro-Phenyl)-Amine     | 0.62          | 0.6  | 0.76    |
| DB04417     | 100-02-7   | P-Nitrophenol                                                                 | 0.73          | 0.64 | 0.76    |
| DB09252     | 306-19-4   | Pivhydrazine                                                                  | 0.6           | 0.67 | 0.75    |
| DB08178     | -          | 4-(4-methoxy-1H-pyrrolo[2,3-b]pyridin-3-yl)pyrimidin-2-amine                  | 0.63          | 0.63 | 0.75    |
| DB08182     | -          | 4-(4-propoxy-1H-pyrrolo[2,3-b]pyridin-3-yl)pyrimidin-2-amine                  | 0.58          | 0.59 | 0.75    |
| DB04542     | -          | 3'-Azido-3'-Deoxythymidine-5'-Diphosphate                                     | 0.58          | 0.56 | 0.75    |
| DB08660     | -          | 1,2,5,8-tetrahydroxyanthracene-9,10-dione                                     | 0.71          | 0.64 | 0.75    |
| DB08203     | -          | 7-[2-METHOXY-1-(METHOXYMETHYL                                                 | 0.62          | 0.66 | 0.74    |

|         |             | )ETHYL]-7H-PYRROLO[3,2-F]<br>QUINAZOLINE-1,3-DIAMINE                                        |      |      |      |
|---------|-------------|---------------------------------------------------------------------------------------------|------|------|------|
| DB03407 | 3316-09-4   | 4-Nitrocatechol                                                                             | 0.66 | 0.6  | 0.74 |
| DB04782 | -           | (S)-4-Nitrostyrene oxide                                                                    | 0.62 | 0.57 | 0.74 |
| DB04777 | -           | (R)-4-Nitrostyrene oxide                                                                    | 0.62 | 0.57 | 0.74 |
| DB07551 | -           | 2-CHLORO-4-ETHYLAMINO-6-(S(-)-2'-<br>CYANO-4-BUTYLAMINO)-1,3,5-TRIAZI<br>NE                 | 0.75 | 0.7  | 0.73 |
| DB07552 | -           | 2-CHLORO-4-ETHYLAMINO-6-(R(+)-2'-<br>CYANO-4-BUTYLAMINO)-1,3,5-TRIAZI<br>NE                 | 0.75 | 0.7  | 0.73 |
| DB08204 | -           | 3-DIPHENOL-6-NITRO-3H-BENZO[DE]I<br>SOCHROMEN-1-ONE                                         | 0.61 | 0.55 | 0.73 |
| DB00406 | 14426-25-6  | Gentian Violet                                                                              | 0.71 | 0.68 | 0.73 |
| DB03666 | -           | 3'-Azido-3'-Deoxythymidine-5'-Monophosp<br>hate                                             | 0.6  | 0.58 | 0.73 |
| DB01976 | 62813-37-0  | Aminoanthracene                                                                             | 0.8  | 0.71 | 0.73 |
| DB01613 | 7297-25-8   | Erythrityl Tetranitrate                                                                     | 0.62 | 0.53 | 0.73 |
| DB09253 | 33419-68-0  | Safrazine                                                                                   | 0.56 | 0.66 | 0.72 |
| DB00658 | 52757-95-6  | Sevelamer                                                                                   | 0.81 | 0.67 | 0.72 |
| DB03369 | -           | 9-Aminophenanthrene                                                                         | 0.79 | 0.72 | 0.72 |
| DB03474 | -           | Reactive Red 1 Dye                                                                          | 0.62 | 0.53 | 0.72 |
| DB09246 | 7654-03-7   | Benmoxin                                                                                    | 0.61 | 0.61 | 0.72 |
| DB01129 | 117976-89-3 | Rabeprazole                                                                                 | 0.59 | 0.56 | 0.72 |
| DB03840 | -           | Tetra(Imidazole)Diaquacopper (Ii)                                                           | 0.77 | 0.66 | 0.72 |
| DB00380 | 24584-09-6  | Dexrazoxane                                                                                 | 0.72 | 0.61 | 0.71 |
| DB08519 | -           | N~4~-(3-methyl-1H-indazol-6-yl)-N~2~-(3<br>,4,5-trimethoxyphenyl)pyrimidine-2,4-diam<br>ine | 0.57 | 0.63 | 0.71 |
| DB01275 | 86-54-4     | Hydralazine                                                                                 | 0.61 | 0.71 | 0.71 |
| DB00448 | 103577-45-3 | Lansoprazole                                                                                | 0.6  | 0.56 | 0.71 |
| DB07248 | -           | 7-PYRIDIN-2-YL-N-(3,4,5-TRIMETHOX<br>YPHENYL)-7H-PYRROLO[2,3-D]PYRIM<br>IDIN-2-AMINE        | 0.57 | 0.6  | 0.71 |
| DB00740 | 1744-22-5   | Riluzole                                                                                    | 0.62 | 0.65 | 0.71 |
| DB00488 | 645-05-6    | Altretamine                                                                                 | 0.68 | 0.69 | 0.7  |
| DB07300 | -           | 2-(1H-imidazol-1-yl)-9-methoxy-8-(2-meth<br>oxyethoxy)benzo[c][2,7]naphthyridin-4-am<br>ine | 0.57 | 0.62 | 0.7  |
| DB04528 | 51-28-5     | 2,4-Dinitrophenol                                                                           | 0.64 | 0.56 | 0.7  |
| DB00213 | 102625-70-7 | Pantoprazole                                                                                | 0.65 | 0.58 | 0.7  |

|         |            |                                                                                             |      |      |      |
|---------|------------|---------------------------------------------------------------------------------------------|------|------|------|
| DB07029 | -          | 4-(1,3-BENZODIOXOL-5-YLOXY)-2-[4-(1H-IMIDAZOL-1-YL)PHENOXY]-6-METHYLPYRIMIDINE              | 0.57 | 0.57 | 0.7  |
| DB07862 | -          | 7-(1-ETHYL-PROPYL)-7H-PYRROLO-[3,2-F]QUINAZOLINE-1,3-DIAMINE                                | 0.62 | 0.66 | 0.7  |
| DB08583 | -          | 2-amino-5-[3-(1-ethyl-1H-pyrazol-5-yl)-1H-pyrrolo[2,3-b]pyridin-5-yl]-N,N-dimethylbenzamide | 0.53 | 0.56 | 0.7  |
| DB07408 | -          | 5-(2-NITROPHENYL)-2-FUROIC ACID                                                             | 0.51 | 0.51 | 0.7  |
| DB03924 | -          | 5,8-Di-Amino-1,4-Dihydroxy-Anthraquinone                                                    | 0.68 | 0.69 | 0.7  |
| DB08973 | 3693-39-8  | Fluclorolone acetonide                                                                      | 0.68 | 0.65 | 0.7  |
| DB06898 | -          | 4-(2-amino-1-methyl-1H-imidazo[4,5-b]pyridin-6-yl)phenol                                    | 0.61 | 0.63 | 0.7  |
| DB01213 | 7554-65-6  | Fomepizole                                                                                  | 0.62 | 0.59 | 0.69 |
| DB07824 | -          | 4-ethyl-5-methyl-2-(1H-tetrazol-5-yl)-1,2-dihydro-3H-pyrazol-3-one                          | 0.59 | 0.61 | 0.69 |
| DB00507 | 55981-09-4 | Nitazoxanide                                                                                | 0.55 | 0.6  | 0.69 |
| DB04407 | -          | 4-[4-(4-Methyl-2-Methylamino-Thiazol-5-Yl)-Pyrimidin-2-Ylamino]-Phenol                      | 0.52 | 0.54 | 0.69 |
| DB07562 | -          | N-[4-(2,4-DIMETHYL-THIAZOL-5-YL)-PYRIMIDIN-2-YL]-N',N'-DIMETHYLBENZENE-1,4-DIAMINE          | 0.6  | 0.56 | 0.69 |
| DB00724 | 99011-02-6 | Imiquimod                                                                                   | 0.59 | 0.6  | 0.69 |
| DB08983 | 31637-97-5 | Etofibrate                                                                                  | 0.56 | 0.54 | 0.69 |
| DB07990 | --         | (RP,SP)-O-(2R)-(1-PHENOXYBUT-2-YL)-METHYLPHOSPHONIC ACID CHLORIDE                           | 0.54 | 0.57 | 0.69 |
| DB02105 | -          | 3,5-Dinitrocatechol                                                                         | 0.63 | 0.56 | 0.69 |
| DB08419 | -          | (1S)-1-(PHENOXYMETHYL)PROPYLMETHYLPHOSPHONOCHLORIDOATE                                      | 0.54 | 0.57 | 0.69 |
| DB02671 | 616-47-7   | 1-Methylimidazole                                                                           | 0.72 | 0.66 | 0.69 |
| DB00911 | 19387-91-8 | Tinidazole                                                                                  | 0.56 | 0.55 | 0.68 |
| DB02768 | -          | Tert-Butyloxycarbonyl Group                                                                 | 0.71 | 0.58 | 0.68 |
| DB03789 | -          | 2,3-Dimethylimidazolium Ion                                                                 | 0.73 | 0.67 | 0.68 |
| DB08139 | -          | 5-chloro-7-[(1-methylethyl)amino]pyrazolo[1,5-a]pyrimidine-3-carbonitrile                   | 0.58 | 0.63 | 0.68 |
| DB03585 | 129-20-4   | Oxyphenbutazone                                                                             | 0.63 | 0.61 | 0.68 |
| DB06932 | -          | 10,11-dimethoxy-4-methyldibenzo[c,f]-2,7-naphthyridine-3,6-diamine                          | 0.61 | 0.65 | 0.68 |
| DB02402 | -          | 5-(4-Methoxyphenoxy)-2,4-Quinazolinedia mine                                                | 0.58 | 0.66 | 0.68 |

|         |             |                                                                                                   |      |      |      |
|---------|-------------|---------------------------------------------------------------------------------------------------|------|------|------|
| DB08387 | -           | 2-{{4-(1-methyl-4-pyridin-4-yl-1H-pyrazol-3-yl)phenoxy}methyl}quinoline                           | 0.56 | 0.6  | 0.68 |
| DB04479 | -           | 4-Nitro-Inden-1-One                                                                               | 0.64 | 0.62 | 0.68 |
| DB09118 | 49763-96-4  | Stiripentol                                                                                       | 0.56 | 0.66 | 0.68 |
| DB07008 | -           | 4-(1,3-BENZODIOXOL-5-YLOXY)-2-[4-(1H-IMIDAZOL-1-YL)PHENOXY]PYRIMIDINE                             | 0.57 | 0.57 | 0.68 |
| DB09248 | 65-64-5     | Mebanzine                                                                                         | 0.56 | 0.59 | 0.68 |
| DB02757 | 288-13-1    | Pyrazole                                                                                          | 0.65 | 0.61 | 0.67 |
| DB07584 | -           | N-[2-(5-methyl-4H-1,2,4-triazol-3-yl)phenyl]-7H-pyrrolo[2,3-d]pyrimidin-4-amine                   | 0.6  | 0.59 | 0.67 |
| DB04069 | -           | 5,6-Dihydro-Benzo[H]Cinnolin-3-Ylamine                                                            | 0.61 | 0.6  | 0.67 |
| DB08042 | -           | N~4~-methyl-N~4~--(3-methyl-1H-indazol-6-yl)-N~2~--(3,4,5-trimethoxyphenyl)pyrimidine-2,4-diamine | 0.54 | 0.61 | 0.67 |
| DB08811 | 22345-47-7  | Tofisopam                                                                                         | 0.53 | 0.6  | 0.67 |
| DB09283 | 15421-84-8  | Trapidil                                                                                          | 0.55 | 0.62 | 0.67 |
| DB00990 | 107868-30-4 | Exemestane                                                                                        | 0.54 | 0.64 | 0.67 |
| DB02048 | -           | 1,2,4-Triazole-Carboxamide                                                                        | 0.61 | 0.59 | 0.67 |
| DB08168 | -           | 7-AMINO-4-METHYL-CHROMEN-2-ONE                                                                    | 0.61 | 0.58 | 0.67 |
| DB04518 | -           | 3-[4-(2,4-Dimethyl-Thiazol-5-Yl)-Pyrimidin-2-Ylamino]-Phenol                                      | 0.53 | 0.54 | 0.67 |
| DB07179 | -           | 3-((3-bromo-5-o-tolylpyrazolo[1,5-a]pyrimidin-7-ylamino)methyl)pyridine 1-oxide                   | 0.55 | 0.58 | 0.67 |
| DB09282 | 25717-80-0  | Molsidomine                                                                                       | 0.6  | 0.62 | 0.67 |
| DB08639 | -           | 4-[4-(2,4,6-TRIMETHYL-PHENYLAMINO)-PYRIMIDIN-2-YLAMINO]-BENZONITRILE                              | 0.54 | 0.64 | 0.67 |
| DB00733 | 6735-59-7   | Pralidoxime                                                                                       | 0.56 | 0.59 | 0.67 |
| DB00389 | 22232-54-8  | Carbimazole                                                                                       | 0.52 | 0.52 | 0.66 |
| DB08969 | 333-36-8    | Flurothyl                                                                                         | 0.7  | 0.63 | 0.66 |
| DB08300 | -           | 1-methyl-3-naphthalen-2-yl-1H-pyrazolo[3,4-d]pyrimidin-4-amine                                    | 0.65 | 0.63 | 0.66 |
| DB03060 | -           | Sri-9662                                                                                          | 0.61 | 0.61 | 0.66 |
| DB03180 | -           | 4,5-Dimethyl-1,2-Phenylenediamine                                                                 | 0.63 | 0.63 | 0.66 |
| DB00846 | 1524-88-5   | Flurandrenolide                                                                                   | 0.68 | 0.63 | 0.66 |
| DB04472 | -           | (R)-1-Para-Nitro-Phenyl-2-Azido-Ethanol                                                           | 0.57 | 0.55 | 0.66 |
| DB00696 | 113-15-5    | Ergotamine                                                                                        | 0.62 | 0.62 | 0.66 |
| DB07610 | -           | NAPHTHALENE-1,2-DIOL                                                                              | 0.64 | 0.58 | 0.66 |
| DB08006 | -           | N-anthracen-2-yl-5-methyl[1,2,4]triazolo[1,                                                       | 0.59 | 0.65 | 0.65 |

|         |             |                                                                                            |      |      |      |
|---------|-------------|--------------------------------------------------------------------------------------------|------|------|------|
|         |             | 5-a]pyrimidin-7-amine                                                                      |      |      |      |
| DB07373 | -           | ANDROSTA-1,4-DIENE-3,17-DIONE                                                              | 0.54 | 0.64 | 0.65 |
| DB08788 | -           | 3,6-DIAMINO-5-CYANO-4-(4-ETHOXYPHENYL)THIENO[2,3-B]PYRIDINE-2-CARBOXAMIDE                  | 0.55 | 0.6  | 0.65 |
| DB04491 | -           | Diisopropylphosphono Group                                                                 | 0.65 | 0.59 | 0.65 |
| DB02583 | 175354-76-4 | N6-(2,5-Dimethoxy-Benzyl)-N6-Methyl-Pyridido[2,3-D]Pyrimidine-2,4,6-Triamine               | 0.55 | 0.6  | 0.65 |
| DB03608 | 536-71-0    | Diminazene                                                                                 | 0.6  | 0.62 | 0.65 |
| DB00962 | 151319-34-5 | Zaleplon                                                                                   | 0.55 | 0.58 | 0.65 |
| DB02797 | 13331-27-6  | 3-Nitrophenylboronic Acid                                                                  | 0.66 | 0.6  | 0.65 |
| DB07161 | -           | 5-phenyl-1H-indazol-3-amine                                                                | 0.59 | 0.6  | 0.65 |
| DB02721 | 3469-69-0   | 4-Iodopyrazole                                                                             | 0.63 | 0.59 | 0.65 |
| DB08940 | 853-34-9    | Kebuzone                                                                                   | 0.66 | 0.58 | 0.65 |
| DB03651 | -           | 2,4,6-Trinitrophenol                                                                       | 0.58 | 0.54 | 0.65 |
| DB00863 | 66357-35-5  | Ranitidine                                                                                 | 0.59 | 0.56 | 0.65 |
| DB02589 | -           | Se-Ethyl-Isoselenourea                                                                     | 0.52 | 0.59 | 0.64 |
| DB01676 | 118-96-7    | Trinitrotoluene                                                                            | 0.61 | 0.55 | 0.64 |
| DB00228 | 13838-16-9  | Enflurane                                                                                  | 0.65 | 0.6  | 0.64 |
| DB07236 | -           | 3-(6-HYDROXY-NAPHTHALEN-2-YL)-BENZO[D]ISOOXAZOL-6-OL                                       | 0.52 | 0.55 | 0.64 |
| DB07722 | -           | 3-(4-NITRO-PHENOXY)-PROPAN-1-OL                                                            | 0.54 | 0.57 | 0.64 |
| DB08186 | -           | (3E)-4-(1-METHYL-1H-INDOL-3-YL)BUT-3-EN-2-ONE                                              | 0.56 | 0.54 | 0.64 |
| DB08054 | -           | 1-(1-methylethyl)-3-quinolin-6-yl-1H-pyrazolo[3,4-d]pyrimidin-4-amine                      | 0.56 | 0.61 | 0.64 |
| DB02154 | -           | 2,3-Bis-Benzo[1,3]Dioxol-5-Ylmethyl-Succinic Acid                                          | 0.5  | 0.53 | 0.64 |
| DB08694 | -           | 9-amino-5-(2-aminopyrimidin-4-yl)pyrido[3',2':4,5]pyrrolo[1,2-c]pyrimidin-4-ol             | 0.54 | 0.55 | 0.64 |
| DB01219 | 7261-97-4   | Dantrolene                                                                                 | 0.71 | 0.64 | 0.64 |
| DB02811 | -           | Diethylphosphono Group                                                                     | 0.63 | 0.65 | 0.64 |
| DB08713 | -           | 2,6-DIMETHYL-1-(3-[3-METHYL-5-ISOXAZOLYL]-PROPANYL)-4-[2N-METHYLL-2H-TETRAZOL-5-YL]-PHENOL | 0.53 | 0.59 | 0.64 |
| DB08785 | -           | 4-METHYL-2H-CHROMEN-2-ONE                                                                  | 0.65 | 0.55 | 0.64 |
| DB04982 | 161832-65-1 | Talampanel                                                                                 | 0.5  | 0.58 | 0.64 |
| DB04169 | -           | 3,5-Diaminophthalhydrazide                                                                 | 0.53 | 0.54 | 0.64 |
| DB05791 | -           | Perflubron emulsion                                                                        | 0.67 | 0.64 | 0.64 |
| DB03987 | -           | 2,4-Diamino-6-[N-(3',5'-Dimethoxybenzyl)-N-Methylamino]Pyrido[2,3-D]Pyrimidine             | 0.56 | 0.6  | 0.64 |

|         |             |                                                                                      |      |      |      |
|---------|-------------|--------------------------------------------------------------------------------------|------|------|------|
| DB08340 | -           | N,N'-DIPHENYLPYRAZOLO[1,5-A][1,3,5]TRIAZINE-2,4-DIAMINE                              | 0.51 | 0.61 | 0.64 |
| DB00922 | 141505-33-1 | Levosimendan                                                                         | 0.58 | 0.59 | 0.64 |
| DB08715 | -           | 2,6-DIMETHYL-1-(3-[3-METHYL-5-ISOXAZOLYL]-PROPANYL)-4-[2-METHYL-4-ISOXAZOLYL]-PHENOL | 0.53 | 0.56 | 0.64 |
| DB03764 | -           | 4-Hydroperoxy-2-Methoxy-Phenol                                                       | 0.7  | 0.63 | 0.64 |
| DB00677 | 55-91-4     | Isoflurophate                                                                        | 0.64 | 0.58 | 0.64 |
| DB07731 | -           | 4-[(E)-(3,5-DIAMINO-1H-PYRAZOL-4-YL)DIAZENYL]PHENOL                                  | 0.58 | 0.63 | 0.64 |
| DB01749 | 110-71-4    | 1,2-Dimethoxyethane                                                                  | 0.68 | 0.6  | 0.64 |
| DB02935 | -           | 1-Methoxy-2-(2-Methoxyethoxy)Ethane                                                  | 0.63 | 0.59 | 0.64 |
| DB03399 | -           | Ethyl Isocyanide                                                                     | 0.57 | 0.63 | 0.63 |
| DB03771 | -           | Allyl-{4-[3-(4-Bromo-Phenyl)-Benzofuran-6-Yloxy]-but-2-Enyl}-Methyl-Amine            | 0.53 | 0.6  | 0.63 |
| DB08053 | -           | 1-cyclobutyl-3-(3,4-dimethoxyphenyl)-1H-pyrazolo[3,4-d]pyrimidin-4-amine             | 0.56 | 0.64 | 0.63 |
| DB03347 | -           | Triethyl Phosphate                                                                   | 0.63 | 0.61 | 0.63 |
| DB03033 | -           | 1-Methyloxy-4-Sulfone-Benzene                                                        | 0.56 | 0.61 | 0.63 |
| DB08461 | -           | 3-[(4-AMINO-1-TERT-BUTYL-1H-PYRAZOLO[3,4-D]PYRIMIDIN-3-YL)METHYL]PHENOL              | 0.55 | 0.56 | 0.63 |
| DB00780 | 51-71-8     | Phenelzine                                                                           | 0.51 | 0.54 | 0.63 |
| DB01509 | 4764-17-4   | 3,4-Methylenedioxyamphetamine                                                        | 0.57 | 0.65 | 0.63 |
| DB02427 | -           | 2,4-Diamino-6-[N-(2',5'-Dimethoxybenzyl)-N-Methylamino]Quinazoline                   | 0.55 | 0.6  | 0.63 |
| DB00411 | 51-83-2     | Carbachol                                                                            | 0.55 | 0.52 | 0.63 |
| DB02919 | -           | 2,4-Diamino-6-[N-(3',4',5'-Trimethoxybenzyl)-N-Methylamino]Pyrido[2,3-D]Pyrimidine   | 0.55 | 0.6  | 0.63 |
| DB08146 | -           | 7-(2,5-dihydropyrrol-1-yl)-6-phenyl-pyrido[6,5-d]pyrimidin-2-amine                   | 0.54 | 0.62 | 0.63 |
| DB02127 | -           | Methylphosphonic Acid Diisopropyl Ester                                              | 0.63 | 0.58 | 0.63 |
| DB07511 | -           | 4-(4-methyl-1,3-dioxo-1,3-dihydro-2H-isindol-2-yl)benzotrile                         | 0.54 | 0.54 | 0.62 |
| DB08658 | -           | ETHYL HYDROGEN DIETHYLAMIDOPHOSPHATE                                                 | 0.58 | 0.65 | 0.62 |
| DB00311 | 452-35-7    | Ethoxzolamide                                                                        | 0.54 | 0.54 | 0.62 |
| DB01039 | 49562-28-9  | Fenofibrate                                                                          | 0.59 | 0.53 | 0.62 |
| DB07324 | -           | 3-({2-[(2-AMINO-6-METHYLPYRIMIDIN-4-YL)ETHYNYL]BENZYL}AMINO)-1,3-OXAZOL-2(3H)-ONE    | 0.55 | 0.57 | 0.62 |

|         |             |                                                                                                              |      |      |      |
|---------|-------------|--------------------------------------------------------------------------------------------------------------|------|------|------|
| DB01442 | 13674-05-0  | MMDA                                                                                                         | 0.54 | 0.62 | 0.62 |
| DB04910 | 20559-55-1  | Oxibendazole                                                                                                 | 0.51 | 0.57 | 0.62 |
| DB09243 | 3614-47-9   | Hydracarbazine                                                                                               | 0.55 | 0.57 | 0.62 |
| DB07103 | -           | 2-(4-METHYLPHENOXY)ETHYLPHOSP<br>HINATE                                                                      | 0.56 | 0.59 | 0.62 |
| DB00530 | 183321-74-6 | Erlotinib                                                                                                    | 0.54 | 0.6  | 0.62 |
| DB07488 | -           | {(2Z)-4-AMINO-2-[(4-METHOXYPHEN<br>YL)IMINO]-2,3-DIHYDRO-1,3-THIAZO<br>L-5-YL}(4-METHOXYPHENYL)METHA<br>NONE | 0.54 | 0.57 | 0.62 |
| DB07462 | -           | (3,4-DIHYDROXY-2-NITROPHENYL)(P<br>HENYL)METHANONE                                                           | 0.58 | 0.54 | 0.62 |
| DB01189 | 57041-67-5  | Desflurane                                                                                                   | 0.67 | 0.6  | 0.62 |
| DB00351 | 595-33-5    | Megestrol acetate                                                                                            | 0.57 | 0.52 | 0.61 |
| DB02041 | -           | Isoluminol                                                                                                   | 0.54 | 0.57 | 0.61 |
| DB08864 | 500287-72-9 | Rilpivirine                                                                                                  | 0.54 | 0.63 | 0.61 |
| DB02538 | -           | N-[4-(2-Methylimidazo[1,2-a]Pyridin-3-Yl)<br>-2-Pyrimidinyl]Acetamide                                        | 0.59 | 0.6  | 0.61 |
| DB07198 | -           | 5-HYDROXY-2-(4-HYDROXYPHENYL)-<br>1-BENZOFURAN-7-CARBONITRILE                                                | 0.59 | 0.62 | 0.61 |
| DB07335 | -           | 3-[4-AMINO-1-(1-METHYLETHYL)-1H-<br>PYRAZOLO[3,4-D]PYRIMIDIN-3-YL]PH<br>ENOL                                 | 0.53 | 0.58 | 0.61 |
| DB04463 | -           | 3-(4-Amino-1-Tert-Butyl-1h-Pyrazolo[3,4-<br>D]Pyrimidin-3-Yl)Phenol                                          | 0.57 | 0.58 | 0.61 |
| DB03365 | -           | 4-[3-Hydroxyanilino]-6,7-Dimethoxyquina<br>zoline                                                            | 0.56 | 0.61 | 0.61 |
| DB01247 | 59-63-2     | Isocarboxazid                                                                                                | 0.56 | 0.59 | 0.61 |
| DB00753 | 26675-46-7  | Isoflurane                                                                                                   | 0.65 | 0.59 | 0.61 |
| DB08714 | -           | 2,6-DIMETHYL-1-(3-[3-METHYL-5-ISO<br>XAZOLYL]-PROPANYL)-4-[4-METHYL-<br>2H-TETRAZOL-2-YL]-PHENOL             | 0.53 | 0.59 | 0.61 |
| DB08008 | -           | 5-methyl-N-[4-(trifluoromethyl)phenyl][1,2<br>,4]triazolo[1,5-a]pyrimidin-7-amine                            | 0.54 | 0.61 | 0.61 |
| DB08065 | -           | 2-(1H-pyrazol-3-yl)-1H-benzimidazole                                                                         | 0.57 | 0.59 | 0.61 |
| DB08035 | -           | 1-TERT-BUTYL-3-(2,5-DIMETHYLBEN<br>ZYL)-1H-PYRAZOLO[3,4-D]PYRIMIDI<br>N-4-AMINE                              | 0.54 | 0.59 | 0.61 |
| DB01028 | 76-38-0     | Methoxyflurane                                                                                               | 0.66 | 0.59 | 0.61 |
| DB07032 | -           | 2-(4-HYDROXY-PHENYL)BENZOFURA<br>N-5-OL                                                                      | 0.55 | 0.6  | 0.6  |
| DB08479 | -           | N-(3,5-dimethoxyphenyl)imidodicarbonimi                                                                      | 0.54 | 0.51 | 0.6  |



|         |             |                                                                                                  |      |      |      |
|---------|-------------|--------------------------------------------------------------------------------------------------|------|------|------|
|         |             | dic diamide                                                                                      |      |      |      |
| DB02252 | -           | Iodophenyl                                                                                       | 0.73 | 0.6  | 0.6  |
| DB02967 | 128-53-0    | N-Ethylmaleimide                                                                                 | 0.54 | 0.55 | 0.6  |
| DB04130 | -           | 5-Methoxybenzimidazole                                                                           | 0.58 | 0.6  | 0.6  |
| DB08335 | -           | 4-HYDROXYBENZALDEHYDE<br>O-(3,3-DIMETHYLBUTANOYL)OXIME                                           | 0.51 | 0.61 | 0.6  |
| DB00323 | 134308-13-7 | Tolcapone                                                                                        | 0.59 | 0.54 | 0.6  |
| DB08362 | -           | N-(3-(8-CYANO-4-(PHENYLAMINO)PYRAZOLO[1,5-A][1,3,5]TRIAZIN-2-YLAMINO)PHENYL)ACETAMIDE            | 0.55 | 0.59 | 0.6  |
| DB08363 | -           | 1-(9-ethyl-9H-carbazol-3-yl)-N-methylmethanamine                                                 | 0.54 | 0.57 | 0.6  |
| DB03836 | -           | 1,3,5-Trichloro-Benzene                                                                          | 0.75 | 0.5  | 0.6  |
| DB03695 | -           | 6-(2,5-Dimethoxy-Benzyl)-5-Methyl-Pyridino[2,3-D]Pyrimidine-2,4-Diamine                          | 0.59 | 0.59 | 0.6  |
| DB08699 | -           | 1-tert-butyl-3-(3-methylbenzyl)-1H-pyrazolo[3,4-d]pyrimidin-4-amine                              | 0.57 | 0.59 | 0.6  |
| DB08695 | -           | 3-(4-nitrophenyl)-1H-pyrazole                                                                    | 0.62 | 0.6  | 0.6  |
| DB01006 | 112809-51-5 | Letrozole                                                                                        | 0.57 | 0.6  | 0.6  |
| DB06816 | 7187-62-4   | Pyrvinium                                                                                        | 0.54 | 0.51 | 0.59 |
| DB08786 | -           | 4-(2-methoxyethoxy)-6-methylpyrimidin-2-amine                                                    | 0.56 | 0.59 | 0.59 |
| DB03514 | -           | 2-Methoxy-4-Vinyl-Phenol                                                                         | 0.57 | 0.55 | 0.59 |
| DB03121 | -           | 1-Benzyl-5-Methoxy-2-Methyl-1h-Indol-3-Yl)-Acetic Acid                                           | 0.56 | 0.52 | 0.59 |
| DB00440 | 738-70-5    | Trimethoprim                                                                                     | 0.57 | 0.61 | 0.59 |
| DB02915 | -           | 4-(2,4-Dimethyl-Thiazol-5-Yl)-Pyrimidin-2-Yl)-(4-Trifluoromethyl-Phenyl)-Amine                   | 0.5  | 0.55 | 0.59 |
| DB08538 | -           | N-((2-aminopyrimidin-5-yl)methyl)-5-(2,6-difluorophenyl)-3-ethylpyrazolo[1,5-a]pyrimidin-7-amine | 0.52 | 0.58 | 0.59 |
| DB07525 | -           | 3-(3-methoxybenzyl)-1H-pyrrolo[2,3-b]pyrimidine                                                  | 0.58 | 0.59 | 0.59 |
| DB01656 | 162401-32-3 | Roflumilast                                                                                      | 0.61 | 0.58 | 0.59 |
| DB06967 | -           | 6-ETHYL-5-[9-(3-METHOXYPROPYL)-9H-CARBAZOL-2-YL]PYRIMIDINE-2,4-DIAMINE                           | 0.53 | 0.52 | 0.59 |
| DB01612 | 8017-89-8   | Amyl Nitrite                                                                                     | 0.57 | 0.57 | 0.59 |
| DB02265 | 3439-38-1   | Ethyl-Trimethyl-Silane                                                                           | 0.59 | 0.6  | 0.59 |
| DB02532 | -           | 2,4,6-Triaminoquinazoline                                                                        | 0.59 | 0.63 | 0.59 |
| DB08671 | -           | 5-IMINO-4-(2-TRIFLUOROMETHYL-PHENYL)AZO-5H-PYRAZOL-3-YLAMINE                                     | 0.54 | 0.56 | 0.59 |

|         |             |                                                                                                       |      |      |      |
|---------|-------------|-------------------------------------------------------------------------------------------------------|------|------|------|
| DB00437 | 315-30-0    | Allopurinol                                                                                           | 0.54 | 0.56 | 0.58 |
| DB07229 | -           | 3-{5-[AMINO(IMINIO)METHYL]-1H-INDOL-2-YL}-5-METHOXY-1,1'-BIPHENYLL-2-OLATE                            | 0.51 | 0.52 | 0.58 |
| DB08215 | -           | 2-T-BUTYLAMINO-4-ETHYLAMINO-6-METHYLTHIO-S-TRIAZINE                                                   | 0.58 | 0.59 | 0.58 |
| DB07004 | -           | 2-[(5-hex-1-yn-1-ylfuran-2-yl)carbonyl]-N-methylhydrazinecarbothioamide                               | 0.51 | 0.54 | 0.58 |
| DB04115 | 2086-83-1   | Berberine                                                                                             | 0.57 | 0.6  | 0.58 |
| DB04007 | -           | Bromo-WR99210                                                                                         | 0.51 | 0.57 | 0.58 |
| DB02627 | -           | 4,4'-Biphenyldiboronic Acid                                                                           | 0.61 | 0.6  | 0.58 |
| DB07280 | -           | 5-[4-(DIMETHYLAMINO)PHENYL]-6-[(6-MORPHOLIN-4-YPYRIDIN-3-YL)ETHYNYL]PYRIMIDIN-4-AMINE                 | 0.5  | 0.53 | 0.58 |
| DB00793 | 777-11-7    | Haloprogin                                                                                            | 0.59 | 0.56 | 0.58 |
| DB02091 | -           | 4-(2,4-Dimethyl-Thiazol-5-Yl)-Pyrimidin-2-Ylamine                                                     | 0.59 | 0.57 | 0.58 |
| DB03073 | -           | 3-Methoxybenzamide                                                                                    | 0.57 | 0.61 | 0.58 |
| DB03125 | -           | 2,4-Diamino-5-(3,4,5-Trimethoxy-Benzyl)-Pyrimidin-1-Ium                                               | 0.56 | 0.61 | 0.58 |
| DB05105 | 153168-05-9 | Pleconaril                                                                                            | 0.52 | 0.53 | 0.58 |
| DB08317 | -           | 5-methyl-6-phenylquinazoline-2,4-diamine                                                              | 0.54 | 0.55 | 0.58 |
| DB01996 | 108-99-6    | 3-Methylpyridine                                                                                      | 0.66 | 0.52 | 0.58 |
| DB08454 | -           | N-(5-METHYL-1H-PYRAZOL-3-YL)-2-PHENYLQUINAZOLIN-4-AMINE                                               | 0.54 | 0.54 | 0.58 |
| DB08184 | -           | 2-(2-METHYLPHENYL)-1H-INDOLE-5-CARBOXIMIDAMIDE                                                        | 0.56 | 0.56 | 0.58 |
| DB08075 | -           | 4-(2-amino-1,3-thiazol-4-yl)pyrimidin-2-amine                                                         | 0.55 | 0.55 | 0.58 |
| DB02297 | -           | 2-Amino-6-Chloropyrazine                                                                              | 0.55 | 0.59 | 0.58 |
| DB07168 | -           | [4-({4-[(5-cyclopropyl-1H-pyrazol-3-yl)amino]-6-(methylamino)pyrimidin-2-yl}amino)phenyl]acetonitrile | 0.51 | 0.55 | 0.58 |
| DB07840 | -           | (E)-[4-(3,5-difluorophenyl)-3H-pyrrolo[2,3-b]pyridin-3-ylidene](3-methoxyphenyl)methanol              | 0.57 | 0.57 | 0.58 |
| DB08666 | -           | 5-imino-4-(3-trifluoromethyl-phenylazo)-5H-pyrazol-3-ylamine                                          | 0.54 | 0.55 | 0.58 |
| DB07966 | -           | [4-({4-[(5-cyclopropyl-1H-pyrazol-3-yl)amino]quinazolin-2-yl}amino)phenyl]acetonitrile                | 0.52 | 0.56 | 0.58 |
| DB01236 | 28523-86-6  | Sevoflurane                                                                                           | 0.67 | 0.57 | 0.57 |

|         |             |                                                                         |      |      |      |
|---------|-------------|-------------------------------------------------------------------------|------|------|------|
| DB08145 | -           | 6-(2,6-DIMETHOXYPHENYL)PYRIDO[2,3-D]PYRIMIDINE-2,7-DIAMINE              | 0.6  | 0.63 | 0.57 |
| DB04017 | -           | N-Methyl-N-Propargyl-3-(2,4-Dichlorophenoxy)Propylamine                 | 0.53 | 0.51 | 0.57 |
| DB08533 | -           | 3-methyl-N-(pyridin-4-ylmethyl)imidazo[1,2-a]pyrazin-8-amine            | 0.55 | 0.54 | 0.57 |
| DB02001 | -           | 5-(4-Morpholin-4-Yl-Phenylsulfanyl)-2,4-Quinazolinediamine              | 0.53 | 0.51 | 0.57 |
| DB03853 | -           | Azo-Dye Hapten                                                          | 0.57 | 0.51 | 0.57 |
| DB04254 | -           | 8-Benzo[1,3]Dioxol-,5-Ylmethyl-9-Butyl-2-Fluoro-9h-Purin-6-Ylamine      | 0.52 | 0.55 | 0.57 |
| DB05154 | 187235-37-6 | PA824                                                                   | 0.54 | 0.53 | 0.57 |
| DB00828 | 23155-02-4  | Fosfomycin                                                              | 0.55 | 0.55 | 0.57 |
| DB02918 | -           | 6-(4-Difluoromethoxy-3-Methoxy-Phenyl)-2h-Pyridazin-3-One               | 0.52 | 0.6  | 0.57 |
| DB07073 | -           | 5,5-dimethyl-2-morpholin-4-yl-5,6-dihydro-1,3-benzothiazol-7(4H)-one    | 0.5  | 0.53 | 0.57 |
| DB00827 | 28657-80-9  | Cinoxacin                                                               | 0.55 | 0.59 | 0.57 |
| DB08234 | -           | 5-[3-(2,5-dimethoxyphenyl)prop-1-yn-1-yl]-6-ethylpyrimidine-2,4-diamine | 0.53 | 0.53 | 0.57 |
| DB07427 | -           | 2-[(2-methoxy-5-methylphenoxy)methyl]pyridine                           | 0.58 | 0.57 | 0.57 |
| DB01918 | -           | [Methyltelluro]Acetate                                                  | 0.56 | 0.5  | 0.57 |
| DB00371 | 57-53-4     | Meprobamate                                                             | 0.51 | 0.55 | 0.57 |
| DB08667 | -           | 4-(4-fluoro-phenylazo)-5-imino-5H-pyrazol-3-ylamine                     | 0.56 | 0.57 | 0.57 |
| DB04251 | -           | Monoisopropyl Ester Phosphonic Acid Group                               | 0.55 | 0.54 | 0.57 |
| DB07612 | -           | 6-(3-AMINOPHENYL)-N-(TERT-BUTYL)-2-(TRIFLUOROMETHYL)QUINAZOLIN-4-AMINE  | 0.54 | 0.56 | 0.56 |
| DB08991 | 18694-40-1  | Epirizole                                                               | 0.54 | 0.54 | 0.56 |
| DB04820 | 51-12-7     | Nialamide                                                               | 0.51 | 0.51 | 0.56 |
| DB02372 | -           | 2,5-Dimethylpyrimidin-4-Amine                                           | 0.6  | 0.56 | 0.56 |
| DB01667 | 134-58-7    | 8-azaguanine                                                            | 0.52 | 0.52 | 0.56 |
| DB02170 | -           | 1,8-Di-Hydroxy-4-Nitro-Xanthen-9-One                                    | 0.54 | 0.59 | 0.56 |
| DB02197 | -           | 4-[(4-Imidazo[1,2-a]Pyridin-3-Ylpyrimidin-2-Yl)Amino]Benzenesulfonamide | 0.51 | 0.5  | 0.56 |
| DB02143 | -           | N-Isopropyl-N'-Hydroxyguanidine                                         | 0.59 | 0.59 | 0.56 |
| DB02984 | -           | 4-[3-Methylsulfanylanilino]-6,7-Dimethoxyquinazoline                    | 0.54 | 0.56 | 0.56 |
| DB03098 | -           | [Methylseleno]Acetate                                                   | 0.55 | 0.5  | 0.56 |

|         |             |                                                                                          |      |      |      |
|---------|-------------|------------------------------------------------------------------------------------------|------|------|------|
| DB02998 | 965-93-5    | Methyltrienolone                                                                         | 0.53 | 0.51 | 0.55 |
| DB06875 | -           | 3-(3-FLUORO-4-HYDROXYPHENYL)-7-HYDROXY-1-NAPHTHONITRILE                                  | 0.53 | 0.57 | 0.55 |
| DB04469 | -           | 1-(4-Methoxyphenyl)-3,5-Dimethyl-1h-Pyrazole-4-Carboxylic Acid Ethyl Ester               | 0.5  | 0.51 | 0.55 |
| DB08413 | -           | METHYL-PHOSPHONIC ACID MONO-(4-NITRO-PHENYL) ESTER                                       | 0.5  | 0.51 | 0.55 |
| DB00894 | 968-93-4    | Testolactone                                                                             | 0.59 | 0.52 | 0.55 |
| DB01809 | -           | 1-Ter-Butyl-3-P-Tolyl-1h-Pyrazolo[3,4-D]Pyrimidin-4-Ylamine                              | 0.56 | 0.61 | 0.55 |
| DB08450 | -           | N-1H-indazol-5-yl-2-(6-methylpyridin-2-yl)quinazolin-4-amine                             | 0.54 | 0.58 | 0.55 |
| DB06781 | 23674-86-4  | Difluprednate                                                                            | 0.51 | 0.53 | 0.55 |
| DB02412 | 142-68-7    | Tetrahydropyran                                                                          | 0.58 | 0.51 | 0.55 |
| DB08359 | -           | 2-PHENYLAMINO-4-METHYL-5-ACETYL THIAZOLE                                                 | 0.52 | 0.53 | 0.55 |
| DB03153 | -           | 3h-Pyrazolo[4,3-D]Pyrimidin-7-Ol                                                         | 0.54 | 0.51 | 0.55 |
| DB01541 | 846-48-0    | Boldenone                                                                                | 0.52 | 0.54 | 0.55 |
| DB07245 | -           | 6-[2-(3'-METHOXYBIPHENYL-3-YL)ETHYL]PYRIDIN-2-AMINE                                      | 0.53 | 0.58 | 0.55 |
| DB01665 | -           | ZK-800270                                                                                | 0.52 | 0.52 | 0.55 |
| DB08758 | -           | IMIDAZO[2,1-A]ISOQUINOLINE-2-CARBOHYDRAZIDE                                              | 0.51 | 0.54 | 0.54 |
| DB00556 | 76-19-7     | Perflutren                                                                               | 0.72 | 0.63 | 0.54 |
| DB01782 | -           | 2,6-Dihydroanthra[1,9-Cd]Pyrazol-6-One                                                   | 0.57 | 0.55 | 0.54 |
| DB04360 | -           | Benzo[B]Thiophene-2-Boronic Acid                                                         | 0.54 | 0.54 | 0.54 |
| DB02254 | -           | Trifluoro-thiamin phosphate                                                              | 0.55 | 0.59 | 0.54 |
| DB08744 | -           | 6-methoxy-9-methyl[1,3]dioxolo[4,5-h]quinolin-8(9H)-one                                  | 0.5  | 0.5  | 0.54 |
| DB02104 | -           | 2,4-Diamino-5-Methyl-6-[(3,4,5-Trimethoxy-N-Methylanilino)Methyl]Pyrido[2,3-D]Pyrimidine | 0.52 | 0.53 | 0.54 |
| DB05719 | 488832-69-5 | Elesclomol                                                                               | 0.52 | 0.56 | 0.54 |
| DB04646 | 29096-93-3  | Dibromothymoquinone                                                                      | 0.51 | 0.56 | 0.54 |
| DB08386 | -           | 2-[[4-(4-pyridin-4-yl-1H-pyrazol-3-yl)phenoxy]methyl]quinoline                           | 0.54 | 0.56 | 0.54 |
| DB03730 | -           | 3,9-Dimethyladenine                                                                      | 0.61 | 0.56 | 0.54 |
| DB04449 | -           | 5-(3,3-Dihydroxypropeny)-3-Methoxy-Benzene-1,2-Diol                                      | 0.54 | 0.52 | 0.54 |
| DB02222 | -           | 2,6-Diamino-(S)-9-[2-(Phosphonomethoxy)Propyl]Purine                                     | 0.52 | 0.52 | 0.54 |
| DB08214 | -           | 4-(1H-IMIDAZOL-1-YL)PHENOL                                                               | 0.55 | 0.55 | 0.54 |

|         |           |                                                                                           |      |      |      |
|---------|-----------|-------------------------------------------------------------------------------------------|------|------|------|
| DB01123 | 92-62-6   | Proflavine                                                                                | 0.61 | 0.58 | 0.54 |
| DB03976 | -         | Phosphorylisopropane                                                                      | 0.54 | 0.53 | 0.54 |
| DB07249 | -         | N-(5-chloro-1,3-benzodioxol-4-yl)-6-methoxy-7-(3-piperidin-1-ylpropoxy)quinazolin-4-amine | 0.51 | 0.51 | 0.54 |
| DB02078 | -         | 1-Methoxy-2-[2-(2-Methoxy-Ethoxy)-Ethane                                                  | 0.56 | 0.56 | 0.54 |
| DB03096 | -         | N-Aminoethylmorpholine                                                                    | 0.52 | 0.52 | 0.53 |
| DB06915 | -         | naphthalene-1,2,4,5,7-pentol                                                              | 0.51 | 0.53 | 0.53 |
| DB03129 | -         | [3-(1,3,2-Dioxaborolan-2-Yloxy)Propyl]Guanidine                                           | 0.51 | 0.52 | 0.53 |
| DB09117 | 123-63-7  | Paraldehyde                                                                               | 0.5  | 0.52 | 0.53 |
| DB08436 | -         | 8-BENZO[1,3]DIOXOL-,5-YLMETHYL-9-BUTYL-9H-                                                | 0.52 | 0.54 | 0.53 |
| DB03046 | -         | 7-Methoxy-8-[1-(Methylsulfonyl)-1h-Pyrazol-4-Yl]Naphthalene-2-Carboximidamide             | 0.51 | 0.5  | 0.53 |
| DB02856 | -         | Methyl-Carbamic Acid Ethyl Ester                                                          | 0.58 | 0.53 | 0.53 |
| DB02848 | -         | {4-[3-(6,7-Diethoxy-Quinazolin-4-Ylamino)-Phenyl]-Thiazol-2-Yl}-Methanol                  | 0.51 | 0.55 | 0.53 |
| DB03385 | -         | 4-Methylimidazole                                                                         | 0.63 | 0.51 | 0.53 |
| DB04154 | -         | N-Methyl-N-[3-(6-Phenyl[1,2,4]Triazolo[4,3-B]Pyridazin-3-Yl)Phenyl]Acetamide              | 0.53 | 0.51 | 0.53 |
| DB07621 | -         | (5-(PYRIDIN-3-YL)FURAN-2-YL)METHANAMINE                                                   | 0.51 | 0.54 | 0.52 |
| DB03416 | 532-40-1  | Thiamin Phosphate                                                                         | 0.53 | 0.57 | 0.52 |
| DB03145 | -         | 4-Methyl-5-Hydroxyethylthiazole Phosphate                                                 | 0.51 | 0.51 | 0.52 |
| DB03508 | -         | 1-Ethoxy-2-(2-Methoxyethoxy)Ethane                                                        | 0.55 | 0.56 | 0.52 |
| DB04580 | 606-43-9  | 1-Methyl-2-quinolone                                                                      | 0.53 | 0.5  | 0.52 |
| DB03506 | -         | 9-Deazaadenine                                                                            | 0.58 | 0.58 | 0.52 |
| DB08781 | -         | 1-[(2S)-4-(5-BROMO-1H-PYRAZOLO[3,4-B]PYRIDIN-4-YL)MORPHOLIN-2-YL]METHANAMINE              | 0.52 | 0.55 | 0.52 |
| DB08774 | -         | 1-[(2S)-4-(5-phenyl-1H-pyrazolo[3,4-b]pyridin-4-yl)morpholin-2-yl]methanamine             | 0.51 | 0.53 | 0.52 |
| DB03329 | -         | 2-Pyridinethiol                                                                           | 0.5  | 0.54 | 0.52 |
| DB02207 | 2942-42-9 | 7-Nitroindazole                                                                           | 0.59 | 0.57 | 0.52 |
| DB08357 | -         | 1-ETHOXY-2-(2-ETHOXYETHOXY)ETHANE                                                         | 0.53 | 0.55 | 0.52 |
| DB07959 | -         | 3-(1H-BENZIMIDAZOL-2-YL)-1H-INDAZOLE                                                      | 0.56 | 0.59 | 0.52 |
| DB03164 | -         | 6-Amino-1-Methylpurine                                                                    | 0.56 | 0.55 | 0.51 |

|         |            |                                                                                                                 |      |      |      |
|---------|------------|-----------------------------------------------------------------------------------------------------------------|------|------|------|
| DB00276 | 51264-14-3 | Amsacrine                                                                                                       | 0.5  | 0.5  | 0.51 |
| DB07292 | -          | 4-(2-amino-1,3-thiazol-4-yl)phenol                                                                              | 0.5  | 0.55 | 0.51 |
| DB07821 | -          | (1R)-1,2,2-TRIMETHYLPROPYL<br>(R)-METHYLPHOSPHINATE                                                             | 0.53 | 0.55 | 0.51 |
| DB07822 | -          | (1R)-1,2,2-TRIMETHYLPROPYL<br>(S)-METHYLPHOSPHINATE                                                             | 0.53 | 0.55 | 0.51 |
| DB01795 | -          | Phenyl Boronic Acid                                                                                             | 0.51 | 0.51 | 0.51 |
| DB07613 | -          | 3-phenyl-5-(1H-pyrazol-3-yl)isoxazole                                                                           | 0.54 | 0.52 | 0.51 |
| DB07140 | -          | 5-[(3R)-3-(5-methoxybiphenyl-3-yl)but-1-yn-1-yl]-6-methylpyrimidine-2,4-diamine                                 | 0.52 | 0.51 | 0.51 |
| DB07141 | -          | 5-[(3R)-3-(5-methoxy-4'-methylbiphenyl-3-yl)but-1-yn-1-yl]-6-methylpyrimidine-2,4-diamine                       | 0.5  | 0.53 | 0.5  |
| DB07935 | -          | 5-[(5-fluoro-3-methyl-1H-indazol-4-yl)oxy]benzene-1,3-dicarbonitrile                                            | 0.57 | 0.54 | 0.5  |
| DB06927 | -          | [5-HYDROXY-2-(4-HYDROXYPHENYL)-1-BENZOFURAN-7-YL]ACETONITRILE                                                   | 0.51 | 0.58 | 0.5  |
| DB07412 | -          | 1-biphenyl-2-ylmethanamine                                                                                      | 0.51 | 0.54 | 0.5  |
| DB02002 | -          | 2-Aminoprop-2-Enamide                                                                                           | 0.58 | 0.53 | 0.5  |
| DB07595 | -          | (5Z)-5-(3-BROMOCYCLOHEXA-2,5-DIEN-1-YLIDENE)-N-(PYRIDIN-4-YLMETHYL)-1,5-DIHYDROPYRAZOLO[1,5-A]PYRIMIDIN-7-AMINE | 0.51 | 0.54 | 0.5  |

---

**Supplementary Table S2:** Detailed information for the compounds in the training dataset

| Index | Name                                              | CAS        | SMILES                                                                   | Class          |
|-------|---------------------------------------------------|------------|--------------------------------------------------------------------------|----------------|
| 1     | Acetaminophen                                     | 103-90-2   | <chem>CC(=O)NC1=CC=C(C=C1)O</chem>                                       | Carcinogen     |
| 2     | Acetohexamide                                     | 968-81-0   | <chem>CC(=O)C1=CC=C(C=C1)S(=O)(=O)NC(=O)NC2CCCC2</chem>                  | Non-Carcinogen |
| 3     | Acetone[4-(5-nitro-2-furyl)-2-thiazolyl]hydrazone | 18523-69-8 | <chem>CC(=NNC1=NC=C(S1)C2=CC=C(O2)[N+](=O)[O-])C</chem>                  | Carcinogen     |
| 4     | Acetoxime                                         | 127-06-0   | <chem>CC(=NO)C</chem>                                                    | Carcinogen     |
| 5     | 1'-Acetoxysafrole                                 | 34627-78-6 | <chem>CC(=O)OC(C=C)C1=CC2=C(C=C1)OCO2</chem>                             | Carcinogen     |
| 6     | 4-Acetylaminobiphenyl                             | 4075-79-0  | <chem>CC(=O)NC1=CC=C(C=C1)C2=CC=CC=C2</chem>                             | Carcinogen     |
| 7     | 1-Acetylaminofluorene                             | 28314-03-6 | <chem>CC(=O)NC1=CC=CC2=C1CC3=CC=CC=C32</chem>                            | Non-Carcinogen |
| 8     | 2-Acetylaminofluorene                             | 53-96-3    | <chem>CC(=O)NC1=CC2=C(C=C1)C3=CC=CC=C3C2</chem>                          | Carcinogen     |
| 9     | 4-Acetylaminofluorene                             | 28322-02-3 | <chem>CC(=O)NC1=CC=CC2=C1C3=CC=CC=C3C2</chem>                            | Non-Carcinogen |
| 10    | 4-Acetylaminophenylacetic acid                    | 18699-02-0 | <chem>CC(=O)NC1=CC=C(C=C1)CC(=O)O</chem>                                 | Non-Carcinogen |
| 11    | N-Acetylcysteine                                  | 616-91-1   | <chem>CC(=O)N[C@@H](CS)C(=O)O</chem>                                     | Non-Carcinogen |
| 12    | Acrolein                                          | 107-02-8   | <chem>C=CC=O</chem>                                                      | Non-Carcinogen |
| 13    | Acrolein diethylacetal                            | 3054-95-3  | <chem>CCOC(C=C)OCC</chem>                                                | Non-Carcinogen |
| 14    | Acrolein oxime                                    | 5314-33-0  | <chem>C=C/C=N/O</chem>                                                   | Non-Carcinogen |
| 15    | Acronycine                                        | 7008-42-6  | <chem>CC1(C=CC2=C3C(=C(C=C2O1)OC)C(=O)C4=CC=CC=C4N3C)C</chem>            | Carcinogen     |
| 16    | Acrylamide                                        | 79-06-1    | <chem>C=CC(=O)N</chem>                                                   | Carcinogen     |
| 17    | Acrylic acid                                      | 79-10-7    | <chem>C=CC(=O)O</chem>                                                   | Non-Carcinogen |
| 18    | Acrylonitrile                                     | 107-13-1   | <chem>C=CC#N</chem>                                                      | Carcinogen     |
| 19    | Adipamide                                         | 628-94-4   | <chem>C(CCC(=O)N)CC(=O)N</chem>                                          | Non-Carcinogen |
| 20    | AF-2                                              | 3688-53-7  | <chem>C1=COC(=C1)/C(=C/C2=CC=C(O2)[N+](=O)[O-])/C(=O)N</chem>            | Carcinogen     |
| 21    | Aflatoxicol                                       | 29611-03-8 | <chem>COC1=C2C3=C([C@@H](CC3)O)C(=O)OC2=C4[C@@H]5C=CO[C@H]5OC4=C1</chem> | Carcinogen     |
| 22    | Aflatoxin B1                                      | 1162-65-8  | <chem>COC1=C2C3=C(C(=O)CC3)C(=O)OC2=C4C5C=CO5OC4=C1</chem>               | Carcinogen     |
| 23    | Aflatoxin G1                                      | 1165-39-5  | <chem>COC1=C2C3=C(C(=O)OCC3)C(=O)OC2=C4C5C=CO5OC4=C1</chem>              | Carcinogen     |
| 24    | Alclofenac                                        | 22131-79-9 | <chem>C=CCOC1=C(C=C(C=C1)CC(=O)O)Cl</chem>                               | Non-Carcinogen |
| 25    | Aldicarb                                          | 116-06-3   | <chem>CC(C)/(C=N/OC(=O)NC)SC</chem>                                      | Non-Carcinogen |

|    |                                                                                   |            |                                                                            |                |
|----|-----------------------------------------------------------------------------------|------------|----------------------------------------------------------------------------|----------------|
| 26 | Aldrin                                                                            | 309-00-2   | <chem>C1[C@@H]2C=CC1[C@H]3[C@@H]2[C@]4(C(=C(C3(C4(C1)Cl)Cl)Cl)Cl)Cl</chem> | Non-Carcinogen |
| 27 | Alkylbenzenesulfonate                                                             | 42615-29-2 | <chem>CCCCCCCCCCC(C)C1=CC=C(C=C1)S(=O)(=O)[O-]</chem>                      | Non-Carcinogen |
| 28 | Decylamine oxide                                                                  | 2605-79-0  | <chem>CCCCCCCCCC[N+](C)(C)[O-]</chem>                                      | Non-Carcinogen |
| 29 | Allantoin                                                                         | 97-59-6    | <chem>C1(C(=O)NC(=O)N1)NC(=O)N</chem>                                      | Non-Carcinogen |
| 30 | Allyl alcohol                                                                     | 107-18-6   | <chem>C=CCO</chem>                                                         | Non-Carcinogen |
| 31 | Allyl glycidyl ether                                                              | 106-92-3   | <chem>C=CCOCC1CO1</chem>                                                   | Non-Carcinogen |
| 32 | Allyl isothiocyanate                                                              | 57-06-7    | <chem>C=CCN=C=S</chem>                                                     | Carcinogen     |
| 33 | Allyl isovalerate                                                                 | 2835-39-4  | <chem>CC(C)CC(=O)OCC=C</chem>                                              | Carcinogen     |
| 34 | 1-Allyl-1-nitrosourea                                                             | 760-56-5   | <chem>C=CCN(C(=O)N)N=O</chem>                                              | Carcinogen     |
| 35 | 1-Amino-2,4-dibromoanthraquinone                                                  | 81-49-2    | <chem>C1=CC=C2C(=C1)C(=O)C3=C(C2=O)C(=C(C=C3Br)Br)N</chem>                 | Carcinogen     |
| 36 | 3-Amino-4-ethoxyacetanilide                                                       | 17026-81-2 | <chem>CCOC1=C(C=C(C=C1)NC(=O)C)N</chem>                                    | Non-Carcinogen |
| 37 | 3-Amino-9-ethylcarbazole                                                          | 6109-97-3  | <chem>CCN1C2=C(C=C(C=C2)N)C3=CC=CC=C31</chem>                              | Carcinogen     |
| 38 | 3-Amino-4-[2-[(2-guanidinothiazol-4-yl)methylthio], ethylamino]-1,2,5-thiadiazole | NOCAS      | <chem>C1=C(N=C(S1)N=C(N)N)CSCCNC2=NSN=C2N</chem>                           | Carcinogen     |
| 39 | 1-Amino-2-methylanthraquinone                                                     | 82-28-0    | <chem>CC1=C(C2=C(C=C1)C(=O)C3=CC=CC=C3C2=O)N</chem>                        | Carcinogen     |
| 40 | 2-Amino-5-(5-nitro-2-furyl)-1,3,4-oxadiazole                                      | 3775-55-1  | <chem>C1=C(OC(=C1)[N+](=O)[O-])C2=NN=C(O2)N</chem>                         | Carcinogen     |
| 41 | 2-Amino-5-(5-nitro-2-furyl)-1,3,4-thiadiazole                                     | 712-68-5   | <chem>C1=C(OC(=C1)[N+](=O)[O-])C2=NN=C(S2)N</chem>                         | Carcinogen     |
| 42 | 2-Amino-4-(5-nitro-2-furyl)thiazole                                               | 38514-71-5 | <chem>C1=C(OC(=C1)[N+](=O)[O-])C2=CSC(=N2)N</chem>                         | Carcinogen     |
| 43 | 2-Amino-4-nitrophenol                                                             | 99-57-0    | <chem>C1=CC(=C(C=C1[N+](=O)[O-])N)O</chem>                                 | Carcinogen     |
| 44 | 2-Amino-5-nitrophenol                                                             | 121-88-0   | <chem>C1=CC(=C(C=C1[N+](=O)[O-])O)N</chem>                                 | Carcinogen     |
| 45 | 4-Amino-2-nitrophenol                                                             | 119-34-6   | <chem>C1=CC(=C(C=C1N)[N+](=O)[O-])O</chem>                                 | Carcinogen     |
| 46 | 2-Amino-5-nitrothiazole                                                           | 121-66-4   | <chem>C1=C(SC(=N1)N)[N+](=O)[O-]</chem>                                    | Carcinogen     |



|    |                                                       |            |                                                                                    |                |
|----|-------------------------------------------------------|------------|------------------------------------------------------------------------------------|----------------|
| 47 | Tamian                                                | 18968-99-5 | <chem>C1=CC=C(C=C1)C2C(=O)N=C(O2)N</chem>                                          | Non-Carcinogen |
| 48 | 2-Aminoanthraquinone                                  | 117-79-3   | <chem>C1=CC=C2C(=C1)C(=O)C3=C(C2=O)C=C(C=C3)N</chem>                               | Carcinogen     |
| 49 | o-Aminoazotoluene                                     | 97-56-3    | <chem>CC1=CC=CC=C1N=NC2=CC(=C(C=C2)N)C</chem>                                      | Carcinogen     |
| 50 | 6-Aminocaproic acid                                   | 60-32-2    | <chem>C(CCC(=O)O)CCN</chem>                                                        | Non-Carcinogen |
| 51 | 4-Aminodiphenyl 1-(Aminomethyl)cyclohexaneacetic acid | 92-67-1    | <chem>C1=CC=C(C=C1)C2=CC=C(C=C2)N</chem>                                           | Carcinogen     |
| 52 | 2,2-[(4-Aminophenyl)imino]bisethanol                  | 60142-96-3 | <chem>C1CCC(CC1)(CC(=O)O)CN</chem>                                                 | Carcinogen     |
| 53 | 11-Aminoundecanoic acid                               | 54381-16-7 | <chem>C1=CC(=CC=C1N)N(CCO)CCO</chem>                                               | Non-Carcinogen |
| 54 | Ammonium Amobarbital                                  | 2432-99-7  | <chem>C(CCCCN)CCCCC(=O)O</chem>                                                    | Carcinogen     |
| 55 | dl-Amphetamine                                        | 3012-65-5  | <chem>C(C(=O)O)C(CC(=O)[O-])(C(=O)[O-])O</chem>                                    | Non-Carcinogen |
| 56 | Ampicillin                                            | 57-43-2    | <chem>CCC1(C(=O)NC(=O)NC1=O)CCC(C)C</chem>                                         | Non-Carcinogen |
| 57 | 1-Amyl-1-nitrosourea                                  | 60-13-9    | <chem>CC(CC1=CC=CC=C1)N</chem>                                                     | Non-Carcinogen |
| 58 | trans-Anethole                                        | 7177-48-2  | <chem>CC1([C@@H](N2[C@H](S1)[C@@H](C2=O)NC(=O)[C@@H](C3=CC=CC=C3)N)C(=O)O)C</chem> | Non-Carcinogen |
| 59 | Anilazine                                             | 10589-74-9 | <chem>CCCCCN(C(=O)N)N=O</chem>                                                     | Carcinogen     |
| 60 | o-Anisidine                                           | 4180-23-8  | <chem>C/C=C/C1=CC=C(C=C1)OC</chem>                                                 | Non-Carcinogen |
| 61 | p-Anisidine                                           | 101-05-3   | <chem>C1=CC=C(C=C1)NC2=NC(=NC(=N2)Cl)Cl</chem>                                     | Non-Carcinogen |
| 62 | Anthranilic acid                                      | 134-29-2   | <chem>COC1=CC=CC=C1N</chem>                                                        | Carcinogen     |
| 63 | Aramite                                               | 20265-97-8 | <chem>COC1=CC=C(C=C1)N</chem>                                                      | Non-Carcinogen |
| 64 | Aristolochic acid                                     | 118-92-3   | <chem>C1=CC=C(C=C1)C(=O)O)N</chem>                                                 | Non-Carcinogen |
| 65 | Aroclor 1016                                          | 140-57-8   | <chem>CC(COC1=CC=C(C=C1)C(C)(C)C)OS(=O)OCCCl</chem>                                | Carcinogen     |
| 66 | Aroclor 1242                                          | 10190-99-5 | <chem>COC1=CC=CC2=C3C(=C(C=C21)[N+](=O)[O-])C(=CC4=C3OCO4)C(=O)[O-]</chem>         | Carcinogen     |
| 67 | Aroclor 1254                                          | 12674-11-2 | <chem>C1=CC(=CC(=C1)Cl)C2=CC(=CC(=C2)Cl)Cl</chem>                                  | Carcinogen     |
| 68 | Aroclor 1260                                          | 36559-22-5 | <chem>C1=CC(=C(C(=C1)Cl)Cl)C2=C(C=C(C=C2)Cl)Cl</chem>                              | Carcinogen     |
| 69 | l-Ascorbate                                           | 11097-69-1 | <chem>C1=CC(=C(C(=C1)Cl)Cl)C2=C(C(=C(C=C2)Cl)Cl)Cl)Cl</chem>                       | Carcinogen     |
| 70 | l-Ascorbic acid                                       | 11096-82-5 | <chem>C1=CC(=C(C(=C1)C2=C(C(=C(C=C2)Cl)Cl)Cl)Cl)Cl</chem>                          | Carcinogen     |
| 71 | Aspartame                                             | 134-03-2   | <chem>C(C(C1C(=C(C(=O)O1)O)[O-])O)O</chem>                                         | Non-Carcinogen |
| 72 |                                                       | 50-81-7    | <chem>C([C@@H]([C@@H]1C(=C(C(=O)O1)O)O)O)O</chem>                                  | Non-Carcinogen |
| 73 |                                                       | 22839-47-0 | <chem>COC(=O)[C@H](CC1=CC=CC=C1)NC(=O)[C@H](CC(=O)O)N</chem>                       | Non-Carcinogen |

|     |                 |             |                                                                                                               |                |
|-----|-----------------|-------------|---------------------------------------------------------------------------------------------------------------|----------------|
| 74  | Aspirin         | 50-78-2     | <chem>CC(=O)OC1=CC=CC=C1C(=O)O</chem>                                                                         | Non-Carcinogen |
| 75  | Astemizole      | 68844-77-9  | <chem>COC1=CC=C(C=C1)CCN2CCC(CC2)NC3=NC4=CC=CC=C4N3CC5=CC=C(C=C5)F</chem>                                     | Non-Carcinogen |
| 76  | dl-Atenolol     | 51706-40-2  | <chem>CC(C)NCC(COC1=CC=C(C=C1)CC(=O)N)O</chem>                                                                | Non-Carcinogen |
| 77  | Atrazine        | 1912-24-9   | <chem>CCNC1=NC(=NC(=N1)Cl)NC(C)C</chem>                                                                       | Carcinogen     |
| 78  | Atropine        | 51-55-8     | <chem>CN1[C@@H]2CC[C@H]1CC(C2)OC(=O)C(CO)C3=CC=CC=C3</chem>                                                   | Non-Carcinogen |
| 79  | Auramine-O      | 2465-27-2   | <chem>CN(C)C1=CC=C(C=C1)C(=N)C2=CC=C(C=C2)N(C)C</chem>                                                        | Carcinogen     |
| 80  | 5-Azacytidine   | 320-67-2    | <chem>C1=NC(=NC(=O)N1[C@H]2[C@@H]([C@@H]([C@H]2)C(=O)CO)O)N</chem>                                            | Carcinogen     |
| 81  | 6-Azacytidine   | 3131-60-0   | <chem>C1=NN(C(=O)N=C1N)[C@H]2[C@@H]([C@@H]([C@H]2)C(=O)CO)O)O</chem>                                          | Non-Carcinogen |
| 82  | Azaserine       | 115-02-6    | <chem>C([C@@H](C(=O)O)N)O/C=C/[N+]#N/[O-]</chem>                                                              | Carcinogen     |
| 83  | Azathioprine    | 446-86-6    | <chem>CN1C=NC(=C1SC2=NC=NC3=C2NC=N3)[N+](=O)[O-]</chem>                                                       | Non-Carcinogen |
| 84  | Azelnidipine    | 123524-52-7 | <chem>CC1=C(C(C(=C(N1)N)C(=O)OC2CN(C2)C(C3=C(C=CC=C3)C4=CC=CC=C4)C5=CC(=CC=C5)[N+](=O)[O-])C(=O)OC(C)C</chem> | Non-Carcinogen |
| 85  | Azinphosmethyl  | 86-50-0     | <chem>COP(=S)(OC)SCN1C(=O)C2=CC=CC=C2N=N1</chem>                                                              | Non-Carcinogen |
| 86  | Azobenzene      | 103-33-3    | <chem>C1=CC=C(C=C1)N=NC2=CC=CC=C2</chem>                                                                      | Carcinogen     |
| 87  | 1-Azoxypropane  | 17697-55-1  | <chem>CCCN=[N+](CCC)[O-]</chem>                                                                               | Carcinogen     |
| 88  | 2-Azoxypropane  | NOCAS       | <chem>CC(C)N=[N+](C(C)C)[O-]</chem>                                                                           | Carcinogen     |
| 89  | AZT             | 30516-87-1  | <chem>CC1=CN(C(=O)NC1=O)[C@H]2C[C@@H]([C@H]2)C(=O)N=[N+]=[N-]</chem>                                          | Carcinogen     |
| 90  | Barbital        | 144-02-5    | <chem>CCC1(C(=O)NC(=NC1=O)[O-])CC</chem>                                                                      | Carcinogen     |
| 91  | Barbituric acid | 67-52-7     | <chem>C1C(=O)NC(=O)NC1=O</chem>                                                                               | Non-Carcinogen |
| 92  | Bemitradine     | 88133-11-3  | <chem>CCOCCC1=C(N=C(N2C1=NC=N2)N)C3=CC=CC=C3</chem>                                                           | Carcinogen     |
| 93  | Benzalazine     | 64896-26-0  | <chem>C1=CC(=CC=C1C(=O)O)N/N=C/2\C=CC(=O)C(=C2)C(=O)O</chem>                                                  | Non-Carcinogen |
| 94  | Benzaldehyde    | 100-52-7    | <chem>C1=CC=C(C=C1)C=O</chem>                                                                                 | Non-Carcinogen |
| 95  | Benzene         | 71-43-2     | <chem>C1=CC=CC=C1</chem>                                                                                      | Carcinogen     |
| 96  | Benzidine       | 92-87-5     | <chem>C1=CC(=CC=C1C2=CC=C(C=C2)N)N</chem>                                                                     | Carcinogen     |
| 97  | Benzo(a)pyrene  | 50-32-8     | <chem>C1=CC=C2C3=C4C(=CC2=C1)C=CC5=C4C(=CC=C5)C=C3</chem>                                                     | Carcinogen     |
| 98  | Benzoate        | 532-32-1    | <chem>C1=CC=C(C=C1)C(=O)[O-]</chem>                                                                           | Non-Carcinogen |
| 99  | Benzofuran      | 271-89-6    | <chem>C1=CC=C2C(=C1)C=CO2</chem>                                                                              | Carcinogen     |
| 100 | Benzoguanamine  | 91-76-9     | <chem>C1=CC=C(C=C1)C2=NC(=NC(=N2)N)N</chem>                                                                   | Non-Carcinogen |
| 101 | Benzoic acid    | 65-85-0     | <chem>C1=CC=C(C=C1)C(=O)O</chem>                                                                              | Non-Carcinogen |
| 102 | Benzoin         | 119-53-9    | <chem>C1=CC=C(C=C1)C(C(=O)C2=CC=CC=C2)O</chem>                                                                | Non-Carcinogen |

|     |                                                             |            |                                                                                                                                                              |                |
|-----|-------------------------------------------------------------|------------|--------------------------------------------------------------------------------------------------------------------------------------------------------------|----------------|
| 103 | 1H-Benzotriazole                                            | 95-14-7    | <chem>C1=CC2=NNN=C2C=C1</chem>                                                                                                                               | Non-Carcinogen |
| 104 | Benzyl acetate                                              | 140-11-4   | <chem>CC(=O)OCC1=CC=CC=C1</chem>                                                                                                                             | Non-Carcinogen |
| 105 | Benzyl alcohol                                              | 100-51-6   | <chem>C1=CC=C(C=C1)CO</chem>                                                                                                                                 | Non-Carcinogen |
| 106 | Benzyl chloride                                             | 100-44-7   | <chem>C1=CC=C(C=C1)CCl</chem>                                                                                                                                | Non-Carcinogen |
| 107 | o-Benzyl-p-chloro phenol                                    | 120-32-1   | <chem>C1=CC=C(C=C1)CC2=C(C=CC(=C2)Cl)O</chem>                                                                                                                | Non-Carcinogen |
| 108 | Benzyl isothiocyanate                                       | 622-78-6   | <chem>C1=CC=C(C=C1)CN=C=S</chem>                                                                                                                             | Non-Carcinogen |
| 109 | Benzyl thiocyanate                                          | 3012-37-1  | <chem>C1=CC=C(C=C1)CSC#N</chem>                                                                                                                              | Non-Carcinogen |
| 110 | 3-Benzylsydnone-4-acetamide                                 | 14504-15-5 | <chem>C1=CC=C(C=C1)C[N+]2=NOC(=C2CC(=O)N)[O-]</chem>                                                                                                         | Carcinogen     |
| 111 | 2-Biphenylamine                                             | 2185-92-4  | <chem>C1=CC=C(C=C1)C2=CC=CC=C2N</chem>                                                                                                                       | Non-Carcinogen |
| 112 | Bis(2-chloro-1-methylethyl)ether                            | 108-60-1   | <chem>CC(CCl)OC(C)CCl</chem>                                                                                                                                 | Non-Carcinogen |
| 113 | Bis(2,3-dibromopropyl)phosphate                             | 36711-31-6 | <chem>C(C(CBr)Br)OP(=O)([O-])OCC(CBr)Br</chem>                                                                                                               | Carcinogen     |
| 114 | 1,4-Bis[2-(3,5-dichloropyridyloxy)]benzene                  | 76150-91-9 | <chem>C1=CC(=CC=C1OC2=C(C=C(C=N2)Cl)Cl)OC3=C(C=C(C=N3)Cl)Cl</chem>                                                                                           | Non-Carcinogen |
| 115 | 4-Bis(2-hydroxyethyl)amino-2-(5-nitro-2-thienyl)quinazoline | 33372-39-3 | <chem>C1=CC=C2C(=C1)C(=NC(=N2)C3=CC=C(S3)[N+](=O)[O-])N(CCO)CCO</chem>                                                                                       | Carcinogen     |
| 116 | 4-Bis(2-hydroxyethyl)amino-2-(2-thienyl)quinazoline         | 58139-47-2 | <chem>C1=CC=C2C(=C1)C(=NC(=N2)C3=CC=CS3)N(CCO)CCO</chem>                                                                                                     | Non-Carcinogen |
| 117 | Bis(2-hydroxypropyl)amine                                   | 110-97-4   | <chem>CC(CNCC(C)O)O</chem>                                                                                                                                   | Non-Carcinogen |
| 118 | Bisphenol A                                                 | 80-05-7    | <chem>CC(C)(C1=CC=C(C=C1)O)C2=CC=C(C=C2)O</chem>                                                                                                             | Non-Carcinogen |
| 119 | Black PN                                                    | 2519-30-4  | <chem>CC(=O)NC1=C2C(=C(C=C1)S(=O)(=O)[O-])C=C(/C(=N)NC3=C4C=C(C=CC4=C(C=C3)N=NC5=CC=C(C=C5)S(=O)(=O)[O-])S(=O)(=O)[O-])/C2=O)S(=O)(=O)[O-]</chem>            | Non-Carcinogen |
| 120 | C.I. direct black 38                                        | 1937-37-7  | <chem>C1=CC=C(C=C1)N/N=C/2\C(=CC3=CC(=C(C=C3)C2=O)N)N=NC4=CC=C(C=C4)C5=CC=C(C=C5)N=NC6=C(C=C(C=C6)N)N)S(=O)(=O)[O-])S(=O)(=O)[O-]</chem>                     | Carcinogen     |
| 121 | C.I. direct blue 6                                          | 2602-46-2  | <chem>C1=CC(=CC=C1C2=CC=C(C=C2)N/N=C/3\C(=C4=CC(=CC(=C4C3=O)N)S(=O)(=O)[O-])S(=O)(=O)[O-])N/N=C/5\C(=CC6=CC(=CC(=C6C5=O)N)S(=O)(=O)[O-])S(=O)(=O)[O-]</chem> | Carcinogen     |
| 122 | C.I. direct blue 15                                         | 2429-74-5  | <chem>COC1=C(C=CC(=C1)C2=CC=C(C=C2)N/N=C/3\C</chem>                                                                                                          | Carcinogen     |

|     |                                       |            |                                                                                                                                        |                |
|-----|---------------------------------------|------------|----------------------------------------------------------------------------------------------------------------------------------------|----------------|
|     |                                       |            | <chem>C(=O)C4=C(C=C(C=C4C=C3S(=O)(=O)[O-])S(=O)(=O)[O-])N)OC)N/N=C/5\C(=O)C6=C(C=C(C=C6C=C5S(=O)(=O)[O-])S(=O)(=O)[O-])N</chem>        |                |
| 123 | C.I. disperse blue 1                  | 2475-45-8  | <chem>C1=CC(=C2C(=C1N)C(=O)C3=C(C=CC(=C3C2=O)N)N)N</chem>                                                                              | Carcinogen     |
| 124 | FD & C blue no. 1                     | 3844-45-9  | <chem>CCN(CC1=CC(=CC=C1)S(=O)(=O)[O-])C2=CC=C(C=C2)C(=C3C=CC(=[N+](CC)CC4=CC(=CC=C4)S(=O)(=O)[O-])C=C3)C5=CC=CC=C5S(=O)(=O)[O-]</chem> | Non-Carcinogen |
| 125 | FD & C blue no. 2                     | 860-22-0   | <chem>C1=CC2=C(C=C1S(=O)(=O)[O-])C(=O)/C(=C\3/C(=O)C4=C(N3)C=CC(=C4)S(=O)(=O)[O-])/N2</chem>                                           | Non-Carcinogen |
| 126 | HC blue no. 1                         | 2784-94-3  | <chem>CNC1=C(C=C(C=C1)N(CCO)CCO)[N+](=O)[O-]</chem>                                                                                    | Carcinogen     |
| 127 | HC blue no. 2                         | 33229-34-4 | <chem>C1=CC(=C(C=C1N(CCO)CCO)[N+](=O)[O-])NC(=O)C</chem>                                                                               | Non-Carcinogen |
| 128 | Bromocriptine                         | 22260-51-1 | <chem>CC(C)C[C@H]1C(=O)N2CCC[C@H]2[C@]3(N1C(=O)[C@](O3)(C(C)C)NC(=O)[C@H]4CN([C@@H]5CC6=C(NC7=CC=CC(=C67)C5=C4)Br)C)O</chem>           | Carcinogen     |
| 129 | Budesonide                            | 51333-22-3 | <chem>CCC[C@]@H]1O[C@]@H]2C[C@H]3[C@]@H]4C(=O)C=C[C@@]5([C@H]4[C@H](C[C@@]3([C@@]2(O1)C(=O)CO)C)O)C</chem>                             | Carcinogen     |
| 130 | 2-Butoxyethanol                       | 111-76-2   | <chem>CCCCOCCO</chem>                                                                                                                  | Non-Carcinogen |
| 131 | tert-Butyl alcohol                    | 75-65-0    | <chem>CC(C)(C)O</chem>                                                                                                                 | Carcinogen     |
| 132 | n-Butyl chloride                      | 109-69-3   | <chem>CCCCCl</chem>                                                                                                                    | Non-Carcinogen |
| 133 | N-Butyl-N-(4-hydroxybutyl)nitrosamine | 3817-11-6  | <chem>CCCCN(CCCCO)N=O</chem>                                                                                                           | Carcinogen     |
| 134 | di-tert-Butyl-4-hydroxymethyl phenol  | 88-26-6    | <chem>CC(C)(C)C1=CC(=CC(=C1O)C(C)(C)C)CO</chem>                                                                                        | Non-Carcinogen |
| 135 | 2-tert-Butyl-4-methylphenol           | 2409-55-4  | <chem>CC1=CC(=C(C=C1)O)C(C)(C)C</chem>                                                                                                 | Non-Carcinogen |
| 136 | N-Butyl-N'-nitro-N-nitrosoguanidine   | 13010-08-7 | <chem>CCCCN(/C(=N/[N+](=O)[O-])/N)N=O</chem>                                                                                           | Non-Carcinogen |
| 137 | N-n-Butyl-N-nitrosourea               | 869-01-2   | <chem>CCCCN(C(=O)N)N=O</chem>                                                                                                          | Carcinogen     |
| 138 | Butylated hydroxyanisole              | 25013-16-5 | <chem>CC(C)(C)C1=C(C=CC(=C1)OC)O</chem>                                                                                                | Carcinogen     |
| 139 | Butylated hydroxytoluene              | 128-37-0   | <chem>CC1=CC(=C(C(=C1)C(C)(C)C)O)C(C)(C)C</chem>                                                                                       | Non-Carcinogen |
| 140 | 2,4,6-tri-tert-Butyl phenol           | 732-26-3   | <chem>CC(C)(C)C1=CC(=C(C(=C1)C(C)(C)C)O)C(C)(C)C</chem>                                                                                | Non-Carcinogen |
| 141 | p-tert-Butylphenol                    | 98-54-4    | <chem>CC(C)(C)C1=CC=C(C=C1)O</chem>                                                                                                    | Non-Carcinogen |
| 142 | N-Butylurea                           | 592-31-4   | <chem>CCCCNC(=O)N</chem>                                                                                                               | Non-Carcinogen |



|     |                                                                             |            |                                                                       |                |
|-----|-----------------------------------------------------------------------------|------------|-----------------------------------------------------------------------|----------------|
|     | xy-2(5H)-furanone                                                           |            |                                                                       |                |
| 169 | 2-Chloro-5-(3,5-dimethylpiperidinophonyl)benzoic acid                       | 37087-94-8 | <chem>C[C@@H]1C[C@@H](CN(C1)S(=O)(=O)C2=CC(=C(C=C2)Cl)C(=O)O)C</chem> | Carcinogen     |
| 170 | 1-Chloro-2,4-dinitrobenzene                                                 | 97-00-7    | <chem>C1=CC(=C(C=C1[N+](=O)[O-])[N+](=O)[O-])Cl</chem>                | Non-Carcinogen |
| 171 | 3-Chloro-2-methylpropene                                                    | 563-47-3   | <chem>CC(=C)CCl</chem>                                                | Carcinogen     |
| 172 | 1-Chloro-2-nitrobenzene                                                     | 88-73-3    | <chem>C1=CC=C(C=C1)[N+](=O)[O-]Cl</chem>                              | Non-Carcinogen |
| 173 | 1-Chloro-4-nitrobenzene                                                     | 100-00-5   | <chem>C1=CC(=CC=C1[N+](=O)[O-])Cl</chem>                              | Non-Carcinogen |
| 174 | 4-Chloro-m-phenylenediamine                                                 | 5131-60-2  | <chem>C1=CC(=C(C=C1N)N)Cl</chem>                                      | Carcinogen     |
| 175 | 4-Chloro-o-phenylenediamine                                                 | 95-83-0    | <chem>C1=CC(=C(C=C1Cl)N)N</chem>                                      | Carcinogen     |
| 176 | 2-Chloro-p-phenylenediamine                                                 | 61702-44-1 | <chem>C1=CC(=C(C=C1N)Cl)N</chem>                                      | Non-Carcinogen |
| 177 | 1-Chloro-2-propanol                                                         | 127-00-4   | <chem>CC(CCl)O</chem>                                                 | Non-Carcinogen |
| 178 | 3-Chloro-p-toluidine                                                        | 95-74-9    | <chem>CC1=C(C=C(C=C1)N)Cl</chem>                                      | Non-Carcinogen |
| 179 | 5-Chloro-o-toluidine                                                        | 95-79-4    | <chem>CC1=C(C=C(C=C1)Cl)N</chem>                                      | Non-Carcinogen |
| 180 | 4-Chloro-o-toluidine                                                        | 3165-93-3  | <chem>CC1=C(C=CC(=C1)Cl)N</chem>                                      | Non-Carcinogen |
| 181 | [4-Chloro-6-(2,3-xylylidino)-2-pyrimidinylthio]acetic acid                  | 50892-23-4 | <chem>CC1=C(C(=CC=C1)NC2=CC(=NC(=N2)SCC(=O)O)Cl)C</chem>              | Carcinogen     |
| 182 | 4-Chloro-6-(2,3-xylylidino)-2-pyrimidinylthio(N-beta-hydroxyethyl)acetamide | 65089-17-0 | <chem>CC1=C(C(=CC=C1)NC2=CC(=NC(=N2)SCC(=O)NCCO)Cl)C</chem>           | Carcinogen     |
| 183 | 2-Chloroacetophenone                                                        | 532-27-4   | <chem>C1=CC=C(C=C1)C(=O)CCl</chem>                                    | Non-Carcinogen |
| 184 | 4'-(Chloroacetyl)-acetanilide                                               | 140-49-8   | <chem>CC(=O)NC1=CC=C(C=C1)C(=O)CCl</chem>                             | Non-Carcinogen |
| 185 | o-Chlorobenzalmonitrile                                                     | 2698-41-1  | <chem>C1=CC=C(C=C1)C=C(C#N)C#N)Cl</chem>                              | Non-Carcinogen |
| 186 | Chlorobenzene                                                               | 108-90-7   | <chem>C1=CC=C(C=C1)Cl</chem>                                          | Carcinogen     |

|     |                                                                                                                                      |             |                                                                                   |                |
|-----|--------------------------------------------------------------------------------------------------------------------------------------|-------------|-----------------------------------------------------------------------------------|----------------|
| 187 | Chlorobenzilate<br>(2-Chloroethyl)tri                                                                                                | 510-15-6    | <chem>CCOC(=O)C(C1=CC=C(C=C1)Cl)(C2=CC=C(C=C2)Cl)O</chem>                         | Non-Carcinogen |
| 188 | methylammonium<br>chloride                                                                                                           | 999-81-5    | <chem>C[N+](C)(C)CCCl</chem>                                                      | Non-Carcinogen |
| 189 | 1-Chloroethylnitro<br>so-3-(2-hydroxypr<br>opyl) urea                                                                                | NOCAS       | <chem>CC(CNC(=O)N(C(C)Cl)N=O)O</chem>                                             | Carcinogen     |
| 190 | 2-(Chloromethyl)p<br>yridine                                                                                                         | 6959-47-3   | <chem>C1=CC=NC(=C1)CCl</chem>                                                     | Non-Carcinogen |
| 191 | 3-(Chloromethyl)p<br>yridine                                                                                                         | 6959-48-4   | <chem>C1=CC(=CN=C1)CCl</chem>                                                     | Carcinogen     |
| 192 | 3-(p-Chlorophenyl)<br>-1,1-dimethylurea<br>(+)-4-(2-chloroph<br>enyl)-2-[2-(4-isobu<br>tylphenyl)ethyl]-6,                           | 150-68-5    | <chem>CN(C)C(=O)NC1=CC=C(C=C1)Cl</chem>                                           | Carcinogen     |
| 193 | 9-dimethyl-6H-thie<br>no[3,2-f][1,2,4]tria<br>zolo[4,3-a][1,4]dia<br>zepine                                                          | 117279-73-9 | <chem>CC1C2=NN=C(N2C3=C(C=C(S3)CCC4=CC=C(C=C4)CC(C)C(C(=N1)C5=CC=CC=C5Cl)C</chem> | Non-Carcinogen |
| 194 | 1-(4-Chlorophenyl)<br>-1-phenyl-2-propy<br>nyl carbamate                                                                             | 10473-70-8  | <chem>C#CC(C1=CC=CC=C1)(C2=CC=C(C=C2)Cl)OC(=O)N</chem>                            | Carcinogen     |
| 195 | p-Chlorophenyl-2,<br>4,5-trichlorophenyl<br>sulfide                                                                                  | 2227-13-6   | <chem>C1=CC(=CC=C1SC2=CC(=C(C=C2Cl)Cl)Cl)Cl</chem>                                | Non-Carcinogen |
| 196 | Chloropicrin<br>1-(2-chloroethyl)-1<br>-nitroso-3-[(2S,3R,<br>4R,5S,6R)-2,4,5-tri<br>hydroxy-6-(hydrox<br>ymethyl)oxan-3-yl]<br>urea | 76-06-2     | <chem>C(#N)C1=C(C(=C(C(=C1Cl)Cl)Cl)C#N)Cl</chem>                                  | Carcinogen     |
| 197 | NO-CAS                                                                                                                               |             | <chem>C(CCl)N(C(=O)N[C@@H]1[C@H]([C@@H]([C@H]([C@H](O[C@@H]1O)CO)O)O)N=O</chem>   | Carcinogen     |
| 198 | Chlorpheniramine                                                                                                                     | 113-92-8    | <chem>C[NH+](C)CCC(C1=CC=C(C=C1)Cl)C2=CC=CC=N2</chem>                             | Non-Carcinogen |
| 199 | Chlorpropamide                                                                                                                       | 94-20-2     | <chem>CCCNC(=O)NS(=O)(=O)C1=CC=C(C=C1)Cl</chem>                                   | Non-Carcinogen |
| 200 | Choline chloride                                                                                                                     | 67-48-1     | <chem>C[N+](C)(C)CCO</chem>                                                       | Non-Carcinogen |
| 201 | Chrysazin                                                                                                                            | 117-10-2    | <chem>C1=CC2=C(C(=C1)O)C(=O)C3=C(C2=O)C=CC=C3O</chem>                             | Carcinogen     |
| 202 | Cimetidine                                                                                                                           | 51481-61-9  | <chem>CC1=C(N=CN1)CSCCNC(=NC)NC#N</chem>                                          | Non-Carcinogen |
| 203 | trans-Cinnamaldehy<br>de                                                                                                             | 14371-10-9  | <chem>C1=CC=C(C=C1)/C=C/C=O</chem>                                                | Non-Carcinogen |

|     |                       |             |                                                                                             |                |
|-----|-----------------------|-------------|---------------------------------------------------------------------------------------------|----------------|
| 204 | Cinnamyl anthranilate | 87-29-6     | <chem>C1=CC=C(C=C1)/C=C/COC(=O)C2=CC=CC=C2N</chem>                                          | Carcinogen     |
| 205 | Ciprofibrate          | 52214-84-3  | <chem>CC(C)(C(=O)O)OC1=CC=C(C=C1)C2CC2(Cl)Cl</chem>                                         | Carcinogen     |
| 206 | Citral                | 5392-40-5   | <chem>CC(=CCC/C(=C/C=O)/C)C</chem>                                                          | Non-Carcinogen |
| 207 | Citric acid           | 77-92-9     | <chem>C(C(=O)O)C(CC(=O)O)(C(=O)O)O</chem>                                                   | Non-Carcinogen |
| 208 | Citrinin              | 518-75-2    | <chem>C[C@H]1[C@@H](OC=C2C1=C(C(=C(C2=O)C(=O)O)O)C)C</chem>                                 | Carcinogen     |
| 209 | Clivorine             | 33979-15-6  | <chem>C[C@H]1/C=C\C(=O)O[C@@H]2CC[N+]3(C2(C(=CC3)COC(=O)[C@@]1(C)OC(=O)C)[O-])C)/C=C</chem> | Carcinogen     |
| 210 | Clobuzarit            | 22494-47-9  | <chem>CC(C)(C(=O)O)OCC1=CC=C(C=C1)C2=CC=C(C=C2)Cl</chem>                                    | Non-Carcinogen |
| 211 | Clofibrate            | 637-07-0    | <chem>CCOC(=O)C(C)(C)OC1=CC=C(C=C1)Cl</chem>                                                | Carcinogen     |
| 212 | Clonitralid           | 1420-04-8   | <chem>C1=CC(=C(C=C1[N+](=O)[O-])Cl)NC(=O)C2=C(C=CC(=C2)Cl)O</chem>                          | Non-Carcinogen |
| 213 | Clophen A 30          | 55600-34-5  | <chem>C1=CC(=CC(=C1)Cl)C2=CC(=CC=C2)Cl</chem>                                               | Carcinogen     |
| 214 | Codeine               | 76-57-3     | <chem>CN1CC[C@]23[C@@H]4[C@H]1CC5=C2C(=C(C=C5)OC)O[C@H]3[C@H](C=C4)O</chem>                 | Non-Carcinogen |
| 215 | Colcemid              | 477-30-5    | <chem>CN[C@H]1CCC2=CC(=C(C(=C2C3=CC=C(C(=O)C=C13)OC)OC)OC)OC</chem>                         | Non-Carcinogen |
| 216 | Compound 50-892       | 65765-07-3  | <chem>CC1=CC2=C(C=C1)C(=NC(=O)N2C(C)C)C3=CC(=CC=C3)O</chem>                                 | Non-Carcinogen |
| 217 | Coumaphos             | 56-72-4     | <chem>CCOP(=S)(OCC)OC1=CC2=C(C=C1)C(=C(C(=O)O2)Cl)C</chem>                                  | Non-Carcinogen |
| 218 | Coumarin              | 91-64-5     | <chem>C1=CC=C2C(=C1)C=CC(=O)O2</chem>                                                       | Carcinogen     |
| 219 | m-Cresidine           | 102-50-1    | <chem>CC1=C(C=CC(=C1)OC)N</chem>                                                            | Carcinogen     |
| 220 | p-Cresidine           | 120-71-8    | <chem>CC1=CC(=C(C=C1)OC)N</chem>                                                            | Carcinogen     |
| 221 | Crotonaldehyde        | 123-73-9    | <chem>C/C=C/C=O</chem>                                                                      | Carcinogen     |
| 222 | Cupferron             | 135-20-6    | <chem>C1=CC=C(C=C1)N(N=O)[O-]</chem>                                                        | Carcinogen     |
| 223 | Cyanamide             | 156-62-7    | <chem>CCNC1=NC(=NC(=N1)Cl)NC(C)(C)C#N</chem>                                                | Carcinogen     |
| 224 | Cyclamate             | 139-05-9    | <chem>C1CCC(CC1)NS(=O)(=O)[O-]</chem>                                                       | Non-Carcinogen |
| 225 | Cyclocytidine         | 31698-14-3  | <chem>C1=CN2[C@H]3[C@H]([C@@H]([C@H](O3)CO)O)OC2=NC1=N</chem>                               | Non-Carcinogen |
| 226 | Cyclohexanone         | 108-94-1    | <chem>C1CCC(=O)CC1</chem>                                                                   | Non-Carcinogen |
| 227 | Cyclohexylamine       | 4998-76-9   | <chem>C1CCC(CC1)N</chem>                                                                    | Non-Carcinogen |
| 228 | Cyclopentanone oxime  | 1192-28-5   | <chem>C1CCC(=NO)C1</chem>                                                                   | Carcinogen     |
| 229 | Piclamilast           | 144035-83-6 | <chem>COC1=C(C=C(C=C1)C(=O)NC2=C(C=NC=C2Cl)Cl)OC3CCCC3</chem>                               | Carcinogen     |
| 230 | Cyclophosphamide      | 50-18-0     | <chem>C1CNP(=O)(OC1)N(CCCl)CCCl</chem>                                                      | Carcinogen     |
| 231 | l-Cysteine            | 52-89-1     | <chem>C([C@@H](C(=O)O)N)S</chem>                                                            | Non-Carcinogen |



|     |                                            |            |                                                                                                                        |                |
|-----|--------------------------------------------|------------|------------------------------------------------------------------------------------------------------------------------|----------------|
| 232 | Cytembena                                  | 16170-75-5 | <chem>COC1=CC=C(C=C1)C(=O)/C(=C\C(=O)[O-])/Br</chem>                                                                   | Carcinogen     |
| 233 | Dacarbazine                                | 4342-03-4  | <chem>CN(C)N/N=C\1/C(=NC=N1)C(=O)N</chem>                                                                              | Carcinogen     |
| 234 | Daminozide                                 | 1596-84-5  | <chem>CN(C)NC(=O)CCC(=O)O</chem>                                                                                       | Carcinogen     |
| 235 | Dapsone                                    | 80-08-0    | <chem>C1=CC(=CC=C1N)S(=O)(=O)C2=CC=C(C=C2)N</chem>                                                                     | Carcinogen     |
| 236 | p,p'-DDD                                   | 72-54-8    | <chem>C1=CC(=CC=C1C(C2=CC=C(C=C2)Cl)C(Cl)Cl)C1</chem>                                                                  | Non-Carcinogen |
| 237 | p,p'-DDE                                   | 72-55-9    | <chem>C1=CC(=CC=C1C(=C(Cl)Cl)C2=CC=C(C=C2)Cl)Cl</chem>                                                                 | Non-Carcinogen |
| 238 | DDT                                        | 50-29-3    | <chem>C1=CC(=CC=C1C(C2=CC=C(C=C2)Cl)C(Cl)(Cl)Cl)Cl</chem>                                                              | Carcinogen     |
| 239 | Deflazacort                                | 14484-47-0 | <chem>CC1=N[C@@]2([C@H](O1)C[C@@H]3[C@@]2(C[C@@H]([C@H]4[C@H]3CCC5=CC(=O)C=C[C@]45C)O)C)C(=O)COC(=O)C</chem>           | Carcinogen     |
| 240 | Dehydroepiandrosterone                     | 53-43-0    | <chem>C[C@]12CC[C@H]3[C@H]([C@@H]1CCC2=O)CC=C4[C@@]3(CC[C@@H](C4)O)C</chem>                                            | Carcinogen     |
| 241 | Piclamilast                                | 853-23-6   | <chem>CC(=O)O[C@H]1CC[C@@]2([C@H]3CC[C@]4([C@H]([C@@H]3CC=C2C1)CCC4=O)C)C</chem>                                       | Carcinogen     |
| 242 | Deltamethrin                               | 52918-63-5 | <chem>CC1([C@H]([C@H]1C(=O)O[C@H](C#N)C2=CC(=CC=C2)OC3=CC=CC=C3)C=C(Br)Br)C</chem>                                     | Non-Carcinogen |
| 243 | Deserpidine                                | 131-01-1   | <chem>CO[C@H]1[C@@H](C[C@@H]2CN3CCC4=C([C@H]3C[C@@H]2[C@@H]1C(=O)OC)NC5=CC=CC=C45)OC(=O)C6=CC(=C(C(=C6)OC)OC)OC</chem> | Non-Carcinogen |
| 244 | Dexamethazone                              | 50-02-2    | <chem>C[C@@]14([C@]3([C@H](C[C@@]2([C@]1(C(=O)CO)O)C)O)F)C</chem>                                                      | Non-Carcinogen |
| 245 | N-1-Diacetamidofluorene                    | 63019-65-8 | <chem>CC(=O)N(C1=CC=CC2=C1CC3=CC=CC=C32)C(=O)C</chem>                                                                  | Carcinogen     |
| 246 | Diallyl phthalate                          | 131-17-9   | <chem>C=CCOC(=O)C1=CC=CC=C1C(=O)OCC=C</chem>                                                                           | Non-Carcinogen |
| 247 | Diallylnitrosamine                         | 16338-97-9 | <chem>C=CCN(CC=C)N=O</chem>                                                                                            | Carcinogen     |
| 248 | 4,6-Diamino-2-(5-nitro-2-furyl)-S-triazine | 720-69-4   | <chem>C1=C(OC(=C1)[N+](=O)[O-])C2=NC(=NC(=N2)N)N</chem>                                                                | Carcinogen     |
| 249 | 4,4'-Diamino-2,2'-stilbenedisulfonic acid  | 7336-20-1  | <chem>C1=CC(=C(C=C1N)S(=O)(=O)[O-])/C=C/C2=C(C=C(C=C2)N)S(=O)(=O)[O-]</chem>                                           | Non-Carcinogen |
| 250 | 2,4-Diaminoanisole                         | 39156-41-7 | <chem>COC1=C(C=C(C=C1)N)N</chem>                                                                                       | Carcinogen     |
| 251 | 2,4-Diaminophenol                          | 137-09-7   | <chem>C1=CC(=C(C=C1N)N)O</chem>                                                                                        | Non-Carcinogen |
| 252 | 2,4-Diaminotoluene                         | 95-80-7    | <chem>CC1=C(C=C(C=C1)N)N</chem>                                                                                        | Carcinogen     |
| 253 | 2,6-Diaminotoluene                         | 15481-70-6 | <chem>CC1=C(C=CC=C1N)N</chem>                                                                                          | Non-Carcinogen |

|     |                                 |            |                                                                                       |                |
|-----|---------------------------------|------------|---------------------------------------------------------------------------------------|----------------|
| 254 | 2,5-Diaminotoluene              | 6369-59-1  | <chem>CC1=C(C=CC(=C1)N)N</chem>                                                       | Non-Carcinogen |
| 255 | Diazepam                        | 439-14-5   | <chem>CN1C(=O)CN=C(C2=C1C=CC(=C2)Cl)C3=CC=C(C=C3)</chem>                              | Non-Carcinogen |
| 256 | Diazinon                        | 333-41-5   | <chem>CCOP(=S)(OCC)OC1=NC(=NC(=C1)C)C(C)C</chem>                                      | Non-Carcinogen |
| 257 | 3-Diazotyramine                 | NOCAS      | <chem>C1=CC(=C(C=C1CCN)[N+]#N)[O-]</chem>                                             | Carcinogen     |
| 258 | Dibenzo-p-dioxin                | 262-12-4   | <chem>C1=CC=C2C(=C1)OC3=CC=CC=C3O2</chem>                                             | Non-Carcinogen |
| 259 | 3-Dibenzofuranamine             | 4106-66-5  | <chem>C1=CC=C2C(=C1)C3=C(O2)C=C(C=C3)N</chem>                                         | Carcinogen     |
| 260 | O,S-Dibenzoyl thiamine          | 35660-60-7 | <chem>CC1=NC=C(C(=N1)N)CN(C=O)/C(=C(/CCOC(=O)C2=CC=CC=C2)\SC(=O)C3=CC=CC=C3)/C</chem> | Non-Carcinogen |
| 261 | 1,2-Dibromo-3-chloropropane     | 96-12-8    | <chem>C(C(CBr)Br)Cl</chem>                                                            | Carcinogen     |
| 262 | Dibromodulcitol                 | 10318-26-0 | <chem>C([C@H]([C@@H]([C@@H]([C@H](CBr)O)O)O)O)Br</chem>                               | Carcinogen     |
| 263 | Dibromomannitol                 | 488-41-5   | <chem>C([C@@H]([C@H]([C@@H]([C@H](CBr)O)O)O)O)Br</chem>                               | Carcinogen     |
| 264 | 5,7-Dibromoquinoline            | 34522-69-5 | <chem>C1=CC2=C(C=C(C=C2N=C1)Br)Br</chem>                                              | Non-Carcinogen |
| 265 | 1,3-Dibutyl-1-nitrosourea       | 56654-52-5 | <chem>CCCCNC(=O)N(CCCC)N=O</chem>                                                     | Carcinogen     |
| 266 | Dibutyltin diacetate            | 1067-33-0  | <chem>CCCC[Sn](CCCC)(OC(=O)C)OC(=O)C</chem>                                           | Non-Carcinogen |
| 267 | 2,6-Dichloro-p-phenylenediamine | 609-20-1   | <chem>C1=C(C=C(C(=C1Cl)N)Cl)N</chem>                                                  | Non-Carcinogen |
| 268 | 1,2-Dichlorobenzene             | 95-50-1    | <chem>C1=CC=C(C(=C1)Cl)Cl</chem>                                                      | Non-Carcinogen |
| 269 | 1,4-Dichlorobenzene             | 106-46-7   | <chem>C1=CC(=CC=C1Cl)Cl</chem>                                                        | Carcinogen     |
| 270 | 3,3'-Dichlorobenzidine          | 91-94-1    | <chem>C1=CC(=C(C=C1C2=CC(=C(C=C2)N)Cl)Cl)N</chem>                                     | Carcinogen     |
| 271 | trans-1,4-Dichlorobutene-2      | 110-57-6   | <chem>C(/C=C/CCl)Cl</chem>                                                            | Carcinogen     |
| 272 | 2,7-Dichlorodibenzo-p-dioxin    | 33857-26-0 | <chem>C1=CC2=C(C=C1Cl)OC3=C(O2)C=C(C=C3)Cl</chem>                                     | Non-Carcinogen |
| 273 | p,p'-Dichlorodiphenyl sulfone   | 80-07-9    | <chem>C1=CC(=CC=C1S(=O)(=O)C2=CC=C(C=C2)Cl)Cl</chem>                                  | Non-Carcinogen |
| 274 | 2,4-Dichlorophenol              | 120-83-2   | <chem>C1=CC(=C(C=C1Cl)Cl)O</chem>                                                     | Non-Carcinogen |
| 275 | 2,4-Dichlorophenoxyacetic acid  | 94-75-7    | <chem>C1=CC(=C(C=C1Cl)Cl)OCC(=O)O</chem>                                              | Non-Carcinogen |
| 276 | 2,4-Dichloropheno               | 94-80-4    | <chem>CC(CCl)Cl</chem>                                                                | Non-Carcinogen |



|     |                                                                   |            |                                                                                              |                |
|-----|-------------------------------------------------------------------|------------|----------------------------------------------------------------------------------------------|----------------|
|     | resorcinol ether                                                  |            |                                                                                              |                |
| 297 | 5,6-Dihydro-5-aza<br>cytidine                                     | 62488-57-7 | <chem>C1N=C(NC(=O)N1[C@H]2[C@@H]([C@@H]([C@H](O2)CO)O)O)N</chem>                             | Non-Carcinogen |
| 298 | 1,2-Dihydro-2-(5-n<br>itro-2-thienyl)<br>quinazolin-4(3H)-o<br>ne | 33389-33-2 | <chem>C1=CC=C2C(=C1)C(=O)NC(N2)C3=CC=C(S3)[N+](=O)[O-]</chem>                                | Carcinogen     |
| 299 | 3,6-Dihydro-2-nitr<br>oso-2H-1,2-oxazin<br>e                      | 3276-41-3  | <chem>C1C=CCON1N=O</chem>                                                                    | Carcinogen     |
| 300 | 3,4-Dihydrocouma<br>rin                                           | 119-84-6   | <chem>C1CC(=O)OC2=CC=CC=C21</chem>                                                           | Carcinogen     |
| 301 | Dihydrosafrole                                                    | 94-58-6    | <chem>CCCC1=CC2=C(C=C1)OCO2</chem>                                                           | Carcinogen     |
| 302 | 3,3'-Dihydroxyben<br>zidine                                       | 1592-36-5  | <chem>C[C@H](CC[C@H](C(C)(C)O)O)[C@H]1CC[C@H]2[C@@]1(CCC/C2=C\C=C/3\C[C@H](CCC3=C)O)C</chem> | Non-Carcinogen |
| 303 | Diisononyl<br>phthalate                                           | 68515-48-0 | <chem>CC(C)CCCCCOC(=O)C1=CC=CC=C1C(=O)OC(C)C</chem>                                          | Carcinogen     |
| 304 | (R,R)-Dilevalol                                                   | 75659-08-4 | <chem>C[C@H](CCC1=CC=CC=C1)NC[C@@H](C2=CC(=C(C=C2)O)C(=O)N)O</chem>                          | Non-Carcinogen |
| 305 | Dimethadione                                                      | 695-53-4   | <chem>CC1(C(=O)NC(=O)O1)C</chem>                                                             | Non-Carcinogen |
| 306 | Dimethoate                                                        | 60-51-5    | <chem>CNC(=O)CSP(=S)(OC)OC</chem>                                                            | Non-Carcinogen |
| 307 | 2,5-Dimethoxy-4'-<br>aminostilbene                                | 5803-51-0  | <chem>COC1=CC(=C(C=C1)OC)/C=C/C2=CC=C(C=C2)N</chem>                                          | Carcinogen     |
| 308 | 2,4-Dimethoxyanil<br>ine                                          | 54150-69-5 | <chem>COC1=CC(=C(C=C1)N)OC</chem>                                                            | Non-Carcinogen |
| 309 | 3,3'-Dimethoxyben<br>zidine-4,4'-diisocy<br>anate                 | 91-93-0    | <chem>COC1=C(C=CC(=C1)C2=CC(=C(C=C2)N=C=O)O)C)N=C=O</chem>                                   | Carcinogen     |
| 310 | 3,3'-Dimethoxyben<br>zidine                                       | 20325-40-0 | <chem>COC1=C(C=CC(=C1)C2=CC(=C(C=C2)N)OC)N</chem>                                            | Carcinogen     |
| 311 | 5,7-Dimethoxycycl<br>opentene[c]coumar<br>in                      | 1146-71-0  | <chem>COC1=CC(=C2C3=C(CCC3)C(=O)OC2=C1)OC</chem>                                             | Non-Carcinogen |
| 312 | 5,7-Dimethoxycycl<br>opentenone[2,3-c]<br>oumarin                 | 1150-37-4  | <chem>COC1=CC(=C2C(=C1)OC(=O)C3=C2C(=O)CC3)OC</chem>                                         | Non-Carcinogen |
| 313 | 5,7-Dimethoxycycl<br>opentenone[3,2-c]<br>coumarin                | 1150-42-1  | <chem>COC1=CC(=C2C3=C(C(=O)CC3)C(=O)OC2=C1)OC</chem>                                         | Non-Carcinogen |
| 314 | 5,6-Dimethoxysteri<br>gmatocystin                                 | 65176-75-2 | <chem>COC1=C(C2=C(C(=C1)O)C(=O)C3=C(C=C4C(=C3O2)C5C=COC5O4)OC)OC</chem>                      | Carcinogen     |

|     |                                                                                    |             |                                                                         |                |
|-----|------------------------------------------------------------------------------------|-------------|-------------------------------------------------------------------------|----------------|
| 315 | O,O-Dimethyl<br>S-2(acetylamino)ethyl<br>dithiophosphate                           | 13265-60-6  | <chem>CC(=O)NCCSP(=S)(OC)OC</chem>                                      | Non-Carcinogen |
| 316 | N,N-Dimethyl-4-aminoazobenzene                                                     | 60-11-7     | <chem>CN(C)C1=CC=C(C=C1)N=NC2=CC=CC=C2</chem>                           | Carcinogen     |
| 317 | N,N'-Dimethyl-N,N'-dinitrosophthalimide                                            | 3851-16-9   | <chem>CN(C(=O)C1=CC=CC=C1C(=O)N(C)N=O)N=O</chem>                        | Non-Carcinogen |
| 318 | Dimethyl methylphosphonate                                                         | 756-79-6    | <chem>COP(=O)(C)OC</chem>                                               | Carcinogen     |
| 319 | Dimethyl morpholinophosphoramidate                                                 | 597-25-1    | <chem>COP(=O)(N1CCOCC1)OC</chem>                                        | Carcinogen     |
| 320 | 4,6-Dimethyl-2-(5-nitro-2-furyl)pyrimidine                                         | 59-35-8     | <chem>CC1=CC(=NC(=N1)C2=CC=C(O2)[N+](=O)[O-])C</chem>                   | Carcinogen     |
| 321 | 1,2-Dimethyl-5-nitroimidazole                                                      | 551-92-8    | <chem>CC1=NC=C(N1C)[N+](=O)[O-]</chem>                                  | Carcinogen     |
| 322 | Dimethyl terephthalate                                                             | 120-61-6    | <chem>COC(=O)C1=CC=C(C=C1)C(=O)OC</chem>                                | Non-Carcinogen |
| 323 | Dimethylacetamide                                                                  | 127-19-5    | <chem>CC(=O)N(C)C</chem>                                                | Non-Carcinogen |
| 324 | 6-Dimethylamino-4,4-diphenyl-3-heptanolacetate                                     | 43033-72-3  | <chem>CC[C@@H](C(C[C@H](C)N(C)C)(C1=CC=CC=C1)C2=CC=CC=C2)OC(=O)C</chem> | Carcinogen     |
| 325 | 6-Dimethylamino-4,4-diphenyl-3-heptanone                                           | 1095-90-5   | <chem>CCC(=O)C(CC(C)N(C)C)(C1=CC=CC=C1)C2=CC=CC=C2</chem>               | Non-Carcinogen |
| 326 | trans-2-[(Dimethylamino)methylimino]-5-[2-(5-nitro-2-furyl)vinyl]-1,3,4-oxadiazole | 55738-54-0  | <chem>CN(C)CNC1=NN=C(O1)/C=C/C2=CC=C(O2)[N+](=O)[O-]</chem>             | Carcinogen     |
| 327 | Dimethylaminoethyl nitrosoethylurea nitrite salt                                   | 142713-78-8 | <chem>CC[NH2+]C(=O)N(CCN(C)C)N=O</chem>                                 | Carcinogen     |
| 328 | 2,6-Dimethylaniline                                                                | 87-62-7     | <chem>CC1=C(C(=CC=C1)C)N</chem>                                         | Non-Carcinogen |
| 329 | N,N-Dimethylaniline                                                                | 121-69-7    | <chem>CN(C)C1=CC=CC=C1</chem>                                           | Carcinogen     |
| 330 | Dimethylarsinic acid                                                               | 75-60-5     | <chem>CC1(C(=O)NC(=O)NC1=O)C</chem>                                     | Non-Carcinogen |
| 331 | 3,3'-Dimethylbenzidine                                                             | 612-82-8    | <chem>CC1=C(C=CC(=C1)C2=CC(=C(C=C2)N)C)N</chem>                         | Carcinogen     |

|     |                                                       |             |                                                                            |                |
|-----|-------------------------------------------------------|-------------|----------------------------------------------------------------------------|----------------|
|     | dine                                                  |             |                                                                            |                |
| 332 | N,N-Dimethyldodecylamine-N-oxide                      | 1643-20-5   | CCCCCCCCCCCC[N+](C)(C)[O-]                                                 | Non-Carcinogen |
| 333 | Dimethylformamide                                     | 68-12-2     | CN(C)C=O                                                                   | Non-Carcinogen |
| 334 | 2-(2,2-Dimethylhydrazino)-4-(5-nitro-2-furyl)thiazole | 26049-69-4  | CN(C)NC1=NC(=CS1)C2=CC=C(O2)[N+](=O)[O-]                                   | Carcinogen     |
| 335 | 1,3-Dimethylthiourea                                  | 534-13-4    | CNC(=S)NC                                                                  | Non-Carcinogen |
| 336 | Dimethylvinyl chloride                                | 513-37-1    | CC(=CCl)C                                                                  | Carcinogen     |
| 337 | 2,4-Dinitro-6-tert-butylphenylmethane sulfonate       | 29110-68-7  | CC(C)(C)C1=CC(=CC(=C1OS(=O)(=O)C)[N+](=O)[O-])[N+](=O)[O-]                 | Non-Carcinogen |
| 338 | Dinitrosocaffeidine                                   | 145438-97-7 | CN1C=NC(=C1C(=O)N(C)N=O)N(C)N=O                                            | Carcinogen     |
| 339 | Dinitrosohomopiperazine                               | 55557-00-1  | C1CN(CCN(C1)N=O)N=O                                                        | Carcinogen     |
| 340 | N,N-Dinitrosopentamethylenetetramine                  | 101-25-7    | C1N2CN(CN1CN(C2)N=O)N=O                                                    | Non-Carcinogen |
| 341 | 2,6-Dinitrotoluene                                    | 606-20-2    | CC1=C(C=CC=C1[N+](=O)[O-])[N+](=O)[O-]                                     | Carcinogen     |
| 342 | 1,4-Dioxane                                           | 123-91-1    | C1COCCO1                                                                   | Carcinogen     |
| 343 | Dioxathion                                            | 78-34-2     | CCOP(=S)(OCC)SC1C(OCCO1)SP(=S)(OCC)OCC                                     | Non-Carcinogen |
| 344 | Dipentylnitrosamine                                   | 13256-06-9  | CCCCCN(CCCCC)N=O                                                           | Carcinogen     |
| 345 | Diphenhydramine                                       | 147-24-0    | CN(C)CCOC(C1=CC=CC=C1)C2=CC=CC=C2                                          | Non-Carcinogen |
| 346 | Diphenyl-p-phenylenediamine                           | 74-31-7     | C1=CC=C(C=C1)NC2=CC=C(C=C2)NC3=CC=CC=C3                                    | Non-Carcinogen |
| 347 | 5,5-Diphenylhydantoin                                 | 57-41-0     | C1=CC=C(C=C1)C2(C(=O)NC(=O)N2)C3=CC=CC=C3                                  | Non-Carcinogen |
| 348 | N,N-Dipropyl-4-(4'-[pyridyl-1'-oxide]azo)aniline      | NOCAS       | CCCN(CCC)C1=CC=C(C=C1)N=NC2=CC=[N+](C=C2)[O-]                              | Non-Carcinogen |
| 349 | Dipropylene glycol                                    | 25265-71-8  | CCC(O)OC(CC)O                                                              | Non-Carcinogen |
| 350 | Dipyrene                                              | 68-89-3     | CC1=C(C(=O)N(N1C)C2=CC=CC=C2)N(C)CS(=O)(=O)[O-]                            | Non-Carcinogen |
| 351 | Disodium 5'-ribonucleotide                            | 80702-47-2  | C1=NC(=O)C2=C(N1)N(C=N2)[C@H]3[C@@H]([C@@H]([C@H](O3)COP(=O)([O-])[O-])O)O | Non-Carcinogen |
| 352 | 3-O-Dodecylcarbamethylascorbic                        | NOCAS       | CCCCCCCCCCCC(=O)COC1=C(C(=O)O)[C@@H]1[C@H](CO)O                            | Non-Carcinogen |

|     | acid                 |             |                                                                                                                                                                                                                                            |                |
|-----|----------------------|-------------|--------------------------------------------------------------------------------------------------------------------------------------------------------------------------------------------------------------------------------------------|----------------|
| 353 | dl-Dopa              | 63-84-3     | <chem>C1=CC(=C(C=C1CC(C(=O)O)N)O)O</chem>                                                                                                                                                                                                  | Non-Carcinogen |
| 354 | Dopamine             | 62-31-7     | <chem>C1=CC(=C(C=C1CCN)O)O</chem>                                                                                                                                                                                                          | Non-Carcinogen |
| 355 | Doxefazepam          | 40762-15-0  | <chem>C1=CC=C(C(=C1)C2=NC(C(=O)N(C3=C2C=C(C=C3)Cl)CCO)O)F</chem>                                                                                                                                                                           | Non-Carcinogen |
| 356 | Doxylamine succinate | 562-10-7    | <chem>CC(C1=CC=CC=C1)(C2=CC=CC=N2)OCCN(C)C</chem>                                                                                                                                                                                          | Carcinogen     |
| 357 | EDTA                 | 150-38-9    | <chem>C(CN(CC(=O)[O-])CC(=O)[O-])N(CC(=O)O)CC(=O)[O-]</chem>                                                                                                                                                                               | Non-Carcinogen |
| 358 | Efonidipine          | 111011-76-8 | <chem>CC1=C(C(C(=C(N1)C)P2(=O)OCC(CO2)(C)C)C3=CC(=CC=C3)[N+](=O)[O-])C(=O)OCCN(CC4=C C=CC=C4)C5=CC=CC=C5</chem>                                                                                                                            | Non-Carcinogen |
| 359 | Ellagic acid         | 476-66-4    | <chem>C1=C2C3=C(C(=C1O)O)OC(=O)C4=CC(=C(C(=C43)OC2=O)O)O</chem>                                                                                                                                                                            | Non-Carcinogen |
| 360 | Emodin               | 518-82-1    | <chem>CC1=CC(=C2C(=C1)C(=O)C3=CC(=CC(=C3C2=O)O)O)O</chem>                                                                                                                                                                                  | Non-Carcinogen |
| 361 | Endosulfan           | 115-29-7    | <chem>C1C2C(COS(=O)O1)C3(C(=C(C2(C3(Cl)Cl)Cl)Cl)Cl)Cl</chem>                                                                                                                                                                               | Non-Carcinogen |
| 362 | Endrin               | 72-20-8     | <chem>C1[C@@H]2[C@@H]3[C@H]([C@H]1[C@H]4[C@@H]2O4)[C@@]5(C(=C([C@]3(C5(Cl)Cl)Cl)Cl)Cl)Cl</chem>                                                                                                                                            | Non-Carcinogen |
| 363 | Ephedrine            | 134-72-5    | <chem>C[C@@H]([C@@H](C1=CC=CC=C1)O)NC</chem>                                                                                                                                                                                               | Non-Carcinogen |
| 364 | Epichlorohydrin      | 106-89-8    | <chem>C1C(O1)CCl</chem>                                                                                                                                                                                                                    | Carcinogen     |
| 365 | 1,2-Epoxybutane      | 106-88-7    | <chem>CCC1CO1</chem>                                                                                                                                                                                                                       | Carcinogen     |
| 366 | Erythorbate          | 6381-77-7   | <chem>C([C@H]([C@@H]1C(=C(C(=O)O1)O)O)[O-]CC[C@@H]1[C@@]([C@@H]([C@H](C(=O)[C@@H](C[C@@]([C@@H]([C@H]([C@@H]([C@H](C(=O)O1)C)O[C@H]2[C@@]([C@H]([C@@H]([C@H](O2)C)O)(C)OC)O[C@H]3[C@@H]([C@H](C[C@H](O3)C)[NH+](C)C)O)(C)O)C)O)(C)O</chem> | Non-Carcinogen |
| 368 | Estazolam            | 29975-16-4  | <chem>C1C2=NN=CN2C3=C(C=C(C=C3)Cl)C(=N1)C4=CC=CC=C4</chem>                                                                                                                                                                                 | Non-Carcinogen |
| 369 | Estradiol            | 50-28-2     | <chem>C[C@]12CC[C@H]3[C@H]([C@@H]1CC[C@@H]2OC(=O)CC4=CC=C(C=C4)N(CCCl)CCl)CC C5=C3C=CC(=C5)OC(=O)CC6=CC=C(C=C6)N(C CCl)CCCl</chem>                                                                                                         | Non-Carcinogen |
| 370 | Ethinyl estradiol    | 57-63-6     | <chem>C[C@]12CC[C@H]3[C@H]([C@@H]1CC[C@]2(C#C)O)CCC4=C3C=CC(=C4)O</chem>                                                                                                                                                                   | Carcinogen     |
| 371 | Ethionamide          | 536-33-4    | <chem>CCC1=NC=CC(=C1)C(=S)N</chem>                                                                                                                                                                                                         | Non-Carcinogen |
| 372 | Ethionine            | 13073-35-3  | <chem>CCSCC[C@@H](C(=O)O)N</chem>                                                                                                                                                                                                          | Carcinogen     |
| 373 | dl-Ethionine         | 67-21-0     | <chem>CCSCCC(C(=O)O)N</chem>                                                                                                                                                                                                               | Carcinogen     |
| 374 | 4-Ethoxy-phenylur    | 150-69-6    | <chem>CCOC1=CC=C(C=C1)NC(=O)N</chem>                                                                                                                                                                                                       | Carcinogen     |

|     |                                        |             |                                                                                |                |
|-----|----------------------------------------|-------------|--------------------------------------------------------------------------------|----------------|
|     | ea                                     |             |                                                                                |                |
| 375 | Ethoxyquin                             | 91-53-2     | CCOC1=CC2=C(C=C1)NC(C=C2C)(C)C                                                 | Non-Carcinogen |
| 376 | Ethyl acrylate                         | 140-88-5    | CCOC(=O)C=C                                                                    | Carcinogen     |
| 377 | Z-Ethyl-O,N,N-azoxyethane              | 16301-26-1  | CCN=[N+](CC)[O-]                                                               | Carcinogen     |
| 378 | Z-Ethyl-O,N,N-azoxymethane             | 57497-29-7  | CC[N+](=NC)[O-]                                                                | Carcinogen     |
| 379 | S-Ethyl-l-cysteine                     | 2629-59-6   | CCSC[C@@H](C(=O)O)N                                                            | Non-Carcinogen |
| 380 | p,p'-Ethyl-DDD                         | 72-56-0     | CCC1=CC=C(C=C1)C(C2=CC=C(C=C2)CC)C(Cl)Cl                                       | Non-Carcinogen |
|     | Ethyl                                  |             |                                                                                |                |
| 381 | methylphenylglycidate                  | 77-83-8     | CCOC(=O)C1C(O1)(C)C2=CC=CC=C2                                                  | Non-Carcinogen |
| 382 | 1-Ethyl-1-nitrosourea                  | 759-73-9    | CCN(C(=O)N)N=O                                                                 | Carcinogen     |
| 383 | 3-O-Ethylascorbic acid                 | 86404-04-8  | CCOC1=C(C(=O)O)[C@@H]1[C@H](CO)O                                               | Non-Carcinogen |
| 384 | Ethylbenzene                           | 100-41-4    | CCC1=CC=CC=C1                                                                  | Carcinogen     |
| 385 | Ethylene thiourea                      | 96-45-7     | C1CNC(=S)N1                                                                    | Carcinogen     |
| 386 | 1-Ethyleneoxy-3,4-epoxycyclohexane     | 106-87-6    | C1CC2C(O2)CC1C3CO3                                                             | Non-Carcinogen |
| 387 | 2-Ethylhexanol                         | 104-76-7    | CCCCCC(CC)CO                                                                   | Non-Carcinogen |
| 388 | di(2-Ethylhexyl)adipate                | 103-23-1    | CCCCCC(CC)COC(=O)CCCCCC(=O)OCC(CC)CCC                                          | Non-Carcinogen |
| 389 | di(2-Ethylhexyl)phthalate              | 117-81-7    | CCCCCC(CC)COC(=O)C1=CC=CC=C1C(=O)OCC(CC)CCCC                                   | Carcinogen     |
| 390 | 1-Ethylnitroso-3-(2-hydroxyethyl)-urea | 96724-44-6  | CCN(C(=O)NCCO)N=O                                                              | Carcinogen     |
| 391 | 1-Ethylnitroso-3-(2-oxopropyl)-urea    | 110559-84-7 | CCN(C(=O)NCC(=O)C)N=O                                                          | Carcinogen     |
| 392 | Ethylnitrosocyanamide                  | 38434-77-4  | CCN(C#N)N=O                                                                    | Carcinogen     |
| 393 | Ethylphenylacetylua                    | 90-49-3     | CCC(C1=CC=CC=C1)C(=O)NC(=O)N                                                   | Non-Carcinogen |
| 394 | Ethynodioldiacetate                    | 297-76-7    | CC(=O)O[C@H]1CC[C@@H]2[C@H]3CC[C@]4([C@H]([C@@H]3CCC2=C1)CC[C@]4(C#C)OC(=O)C)C | Non-Carcinogen |
| 395 | Etodolac                               | 41340-25-4  | CCC1=CC=CC2=C1NC3=C2CCOC3(CC)CC(=O)O                                           | Non-Carcinogen |
| 396 | Eugenol                                | 97-53-0     | COC1=C(C=CC(=C1)CC=C)O                                                         | Non-Carcinogen |
| 397 | Fadrozole                              | 102676-31-3 | C1CC(N2C=NC=C2C1)C3=CC=C(C=C3)C#N                                              | Non-Carcinogen |



|     |                                                             |             |                                                                                                                                                |                |
|-----|-------------------------------------------------------------|-------------|------------------------------------------------------------------------------------------------------------------------------------------------|----------------|
| 398 | Fenamisosulf                                                | 140-56-7    | <chem>CN(C)C1=CC=C(C=C1)N=NS(=O)(=O)[O-]</chem>                                                                                                | Non-Carcinogen |
| 399 | Fenthion                                                    | 55-38-9     | <chem>CC1=C(C=CC(=C1)OP(=S)(OC)OC)SC</chem>                                                                                                    | Non-Carcinogen |
| 400 | Fenvalerate                                                 | 51630-58-1  | <chem>CC(C)C(C1=CC=C(C=C1)Cl)C(=O)OC(C#N)C2=CC(=CC=C2)OC3=CC=CC=C3</chem>                                                                      | Non-Carcinogen |
| 401 | Flecainide acetate                                          | 54143-56-5  | <chem>C1CCNC(C1)CNC(=O)C2=C(C=CC(=C2)OCC(F)(F)F)OCC(F)(F)F</chem>                                                                              | Non-Carcinogen |
| 402 | Fluconazole                                                 | 86386-73-4  | <chem>C1=CC(=C(C=C1F)F)C(CN2C=NC=N2)(CN3C=NC=N3)O</chem>                                                                                       | Carcinogen     |
| 403 | Fluometuron                                                 | 2164-17-2   | <chem>CN(C)C(=O)NC1=CC=CC(=C1)C(F)(F)F</chem>                                                                                                  | Non-Carcinogen |
| 404 | N-(2-Fluorenyl)-2,2,2-trifluoroacetamide                    | 363-17-7    | <chem>C1C2=CC=CC=C2C3=C1C=C(C=C3)NC(=O)C(F)(F)F</chem>                                                                                         | Carcinogen     |
| 405 | N-4-(4'-Fluorobiphenyl)acetamide                            | 398-32-3    | <chem>CC(=O)NC1=CC=C(C=C1)C2=CC=C(C=C2)F</chem>                                                                                                | Carcinogen     |
| 406 | 2-Fluoroethyl-nitrosourea                                   | 69112-98-7  | <chem>C(CF)N(C(=O)N)N=O</chem>                                                                                                                 | Carcinogen     |
| 407 | 5-Fluorouracil                                              | 51-21-8     | <chem>C1=C(C(=O)NC(=O)N1)F</chem>                                                                                                              | Non-Carcinogen |
| 408 | Fluoxetine                                                  | 59333-67-4  | <chem>CNCCC(C1=CC=CC=C1)OC2=CC=C(C=C2)C(F)(F)F</chem>                                                                                          | Non-Carcinogen |
| 409 | Fluvastatin                                                 | 93957-54-1  | <chem>CC(C)N1C2=CC=CC=C2C(=C1/C=C/[C@H](C[C@@H](CC(=O)O)O)O)C3=CC=C(C=C3)F</chem>                                                              | Carcinogen     |
| 410 | Formic acid<br>2-[4-(2-furyl)-2-thiazolyl]hydrazide         | 31873-81-1  | <chem>C1=COC(=C1)C2=CSC(=N2)NNC=O</chem>                                                                                                       | Non-Carcinogen |
| 411 | Formic acid<br>2-(4-methyl-2-thiazolyl)hydrazide            | 32852-21-4  | <chem>CC1=CSC(=N1)NNC=O</chem>                                                                                                                 | Carcinogen     |
| 412 | Formic acid<br>2-[4-(5-nitro-2-furyl)-2-thiazolyl]hydrazide | 3570-75-0   | <chem>C1=C(OC(=C1)[N+](=O)[O-])C2=CSC(=N2)NNC=O</chem>                                                                                         | Carcinogen     |
| 413 | Fumonisin B1                                                | 116355-83-0 | <chem>CCCC[C@H](C)[C@H]([C@@H](C[C@H](C)C[C@H](CCCC[C@H](C)[C@@H]([C@H](C)N)O)O)OC(=O)C[C@H](CC(=O)O)C(=O)O)OC(=O)C[C@H](CC(=O)O)C(=O)O</chem> | Carcinogen     |
| 414 | 2-Furaldehyde semicarbazone                                 | 2411-74-7   | <chem>C1=COC(=C1)/C=N/NC(=O)N</chem>                                                                                                           | Non-Carcinogen |
| 415 | Furan                                                       | 110-00-9    | <chem>C1=COC=C1</chem>                                                                                                                         | Carcinogen     |
| 416 | Furfural                                                    | 98-01-1     | <chem>C1=COC(=C1)C=O</chem>                                                                                                                    | Carcinogen     |
| 417 | Furfuryl alcohol                                            | 98-00-0     | <chem>C1=COC(=C1)CO</chem>                                                                                                                     | Carcinogen     |
| 418 | Furosemide                                                  | 54-31-9     | <chem>C1=COC(=C1)CNC2=CC(=C(C=C2C(=O)O)S(=O)(=O)N)Cl</chem>                                                                                    | Non-Carcinogen |

|     |                                     |            |                                                                                                                                             |                |
|-----|-------------------------------------|------------|---------------------------------------------------------------------------------------------------------------------------------------------|----------------|
| 419 | Fusarenon-X                         | 23255-69-8 | <chem>CC1=CC2[C@@](C(C1=O)O)([C@]3([C@@H](C@H](C([C@@]34CO4)O2)O)OC(=O)C)C)CO</chem>                                                        | Non-Carcinogen |
| 420 | Gallic acid                         | 149-91-7   | <chem>C1=C(C=C(C(=C1O)O)O)C(=O)O</chem>                                                                                                     | Non-Carcinogen |
| 421 | Gemcadiol                           | 35449-36-6 | <chem>CC(C)(CCCCCCC(C)(C)CO)CO</chem>                                                                                                       | Non-Carcinogen |
| 422 | Gemfibrozil                         | 25812-30-0 | <chem>CC1=CC(=C(C=C1)C)OCCCC(C)(C)C(=O)O</chem>                                                                                             | Carcinogen     |
| 423 | Geranyl acetate                     | NOCAS      | <chem>CC(=CCC/C(=C/COC(=O)C)/C)C</chem>                                                                                                     | Non-Carcinogen |
| 424 | Glu-P-1                             | 67730-11-4 | <chem>CC1=CC=CN2C1=NC3=C2N=C(C=C3)N</chem>                                                                                                  | Carcinogen     |
| 425 | Glu-P-2                             | 67730-10-3 | <chem>C1=CC2=NC3=C(N2C=C1)N=C(C=C3)N</chem>                                                                                                 | Carcinogen     |
| 426 | Glutaraldehyde                      | 111-30-8   | <chem>C(CC=O)CC=O</chem>                                                                                                                    | Non-Carcinogen |
| 427 | Glycerol<br>alpha-monochlorohydrin  | 96-24-2    | <chem>C(C(CCl)O)O</chem>                                                                                                                    | Non-Carcinogen |
| 428 | Glycidaldehyde                      | 765-34-4   | <chem>C1C(O1)C=O</chem>                                                                                                                     | Non-Carcinogen |
| 429 | Glycidol                            | 556-52-5   | <chem>C1C(O1)CO</chem>                                                                                                                      | Carcinogen     |
| 430 | Glycyrrhetic acid                   | 471-53-4   | <chem>C[C@]12CC[C@](C[C@H]1C3=CC(=O)[C@@H]4[C@]5(CC[C@@H](C([C@@H]5CC[C@]4([C@@]3(CC2)C)C)(C)C)O)C)(C)C(=O)O</chem>                         | Non-Carcinogen |
| 431 | FD & C green no. 1                  | 4680-78-8  | <chem>CCN(CC1=CC(=CC=C1)S(=O)(=O)[O-])C2=CC=C(C=C2)C(=C3C=CC(=[N+](CC)CC4=CC(=CC=C4)S(=O)(=O)[O-])C=C3)C5=CC=CC=C5</chem>                   | Carcinogen     |
| 432 | FD & C green no. 2                  | 5141-20-8  | <chem>CCN(CC1=CC(=CC=C1)S(=O)(=O)[O-])C2=CC=C(C=C2)C(=C3C=CC(=[N+](CC)CC4=CC(=CC=C4)S(=O)(=O)[O-])C=C3)C5=CC=C(C=C5)S(=O)(=O)[O-]</chem>    | Carcinogen     |
| 433 | FD & C green no. 3                  | 2353-45-9  | <chem>CCN(CC1=CC(=CC=C1)S(=O)(=O)[O-])C2=CC=C(C=C2)C(=C3C=CC(=[N+](CC)CC4=CC(=CC=C4)S(=O)(=O)[O-])C=C3)C5=C(C=C(C=C5)O)S(=O)(=O)[O-]</chem> | Non-Carcinogen |
| 434 | 1,2,3,7,8,9-Hexachlorodibenzodioxin | 19408-74-3 | <chem>C1=C2C(=C(C(=C1Cl)Cl)Cl)OC3=C(C(=C(C=C3O2)Cl)Cl)Cl</chem>                                                                             | Carcinogen     |
| 435 | Hematoxylin                         | 517-28-2   | <chem>C1C2=CC(=C(C=C2[C@@H]3[C@]1(COC4=C3C=CC(=C4O)O)O)O)O</chem>                                                                           | Carcinogen     |
| 436 | Heptachlor                          | 76-44-8    | <chem>C1=CC(C2C1C3(C(=C(C2(C3(Cl)Cl)Cl)Cl)Cl)Cl)Cl</chem>                                                                                   | Non-Carcinogen |
| 437 | Heptamethyleneimine                 | 1121-92-2  | <chem>C1CCCNCCC1</chem>                                                                                                                     | Non-Carcinogen |
| 438 | Heptylamine                         | 111-68-2   | <chem>CCCCCCCN</chem>                                                                                                                       | Non-Carcinogen |
| 439 | Hexachlorobenzene                   | 118-74-1   | <chem>C1(=C(C(=C(C(=C1Cl)Cl)Cl)Cl)Cl)Cl</chem>                                                                                              | Carcinogen     |
| 440 | Hexachlorobutadiene                 | 87-68-3    | <chem>C(=C(Cl)Cl)(C(=C(Cl)Cl)Cl)Cl</chem>                                                                                                   | Carcinogen     |
| 441 | Hexachlorocyclohexane               | 77-47-4    | <chem>C1(=C(C(C(=C1Cl)Cl)(Cl)Cl)Cl)Cl</chem>                                                                                                | Non-Carcinogen |

|     |                                                      |             |                                                                                           |                |
|-----|------------------------------------------------------|-------------|-------------------------------------------------------------------------------------------|----------------|
|     | ntadiene                                             |             |                                                                                           |                |
| 442 | Hexachlorophene                                      | 70-30-4     | <chem>C1=C(C(=C(C(=C1Cl)Cl)CC2=C(C(=CC(=C2Cl)Cl)Cl)O)O)Cl</chem>                          | Non-Carcinogen |
| 443 | 3-(Hexahydro-4,7-methanoindan-5-yl)-1,1-dimethylurea | 2163-79-3   | <chem>C/C=C/C=C/C=O</chem>                                                                | Carcinogen     |
| 444 | Hexamethylenetetramine                               | 100-97-0    | <chem>C1N2CN3CN1CN(C2)C3</chem>                                                           | Non-Carcinogen |
| 445 | Hexamethylmelamine                                   | 531-18-0    | <chem>C(N(CO)C1=NC(=NC(=N1)N(CO)CO)N(CO)CO)O</chem>                                       | Carcinogen     |
| 446 | Hexamethylphosphoramide                              | 680-31-9    | <chem>CN(C)P(=O)(N(C)C)N(C)C</chem>                                                       | Carcinogen     |
| 447 | Hexanamide                                           | 628-02-4    | <chem>CCCCCC(=O)N</chem>                                                                  | Non-Carcinogen |
| 448 | Hexane                                               | 110-54-3    | <chem>CCCCCC</chem>                                                                       | Non-Carcinogen |
| 449 | 1-O-Hexyl-2,3,5-trimethylhydroquinone                | 148081-72-5 | <chem>CCCCCOC1=C(C(=C(C(=C1)C)O)C)C</chem>                                                | Non-Carcinogen |
| 450 | N-Hexylnitrosourea                                   | 18774-85-1  | <chem>CCCCCCN(C(=O)N)N=O</chem>                                                           | Carcinogen     |
| 451 | 4-Hexylresorcinol                                    | 136-77-6    | <chem>CCCCCC1=C(C=C(C=C1)O)O</chem>                                                       | Non-Carcinogen |
| 452 | l-Histidine                                          | 645-35-2    | <chem>C1=C(NC=N1)C[C@@H](C(=O)O)N</chem>                                                  | Non-Carcinogen |
| 453 | 2-Hydrazino-4-(p-aminophenyl)thiazole                | 26049-71-8  | <chem>C1=CC(=CC=C1C2=CSC(=N2)NN)N</chem>                                                  | Carcinogen     |
| 454 | 2-Hydrazino-4-(5-nitro-2-furyl)thiazole              | 26049-68-3  | <chem>C1=C(OC(=C1)[N+](=O)[O-])C2=CSC(=N2)NN</chem>                                       | Carcinogen     |
| 455 | 2-Hydrazino-4-(p-nitrophenyl)thiazole                | 26049-70-7  | <chem>C1=CC(=CC=C1C2=CSC(=N2)NN)[N+](=O)[O-]</chem>                                       | Carcinogen     |
| 456 | 2-Hydrazino-4-phenylthiazole                         | 34176-52-8  | <chem>C1=CC=C(C=C1)C2=CSC(=N2)NN</chem>                                                   | Non-Carcinogen |
| 457 | Hydrazobenzene                                       | 122-66-7    | <chem>C1=CC=C(C=C1)NNC2=CC=CC=C2</chem>                                                   | Carcinogen     |
| 458 | Hydrochlorothiazide                                  | 58-93-5     | <chem>C1NC2=CC(=C(C=C2S(=O)(=O)N1)S(=O)(=O)N)Cl</chem>                                    | Non-Carcinogen |
| 459 | Hydrocortisone                                       | 50-23-7     | <chem>C[C@]12CCC(=O)C=C1CC[C@@H]3[C@@H]2[C@@H](C[C@]4([C@H]3CC[C@@]4(C(=O)CO)O)C)O</chem> | Non-Carcinogen |
| 460 | Hydroquinone                                         | 123-31-9    | <chem>C1=CC(=CC=C1)O</chem>                                                               | Carcinogen     |
| 461 | 4-Acetamido-3-hydroxybiphenyl                        | 13347-44-9  | <chem>CC(=O)NC1=C(C=C(C=C1)C2=CC=CC=C2)O</chem>                                           | Non-Carcinogen |
| 462 | N-Hydroxy-2-acet                                     | 53-95-2     | <chem>CC(=O)N(C1=CC2=C(C=C1)C3=CC=CC=C3C2)O</chem>                                        | Carcinogen     |

|     |                                                                            |             |                                                                     |                |
|-----|----------------------------------------------------------------------------|-------------|---------------------------------------------------------------------|----------------|
|     | ylaminofluorene                                                            |             |                                                                     |                |
| 463 | 3-Hydroxy-4-aminobiphenyl                                                  | 4363-03-5   | <chem>C1=CC=C(C=C1)C2=CC(=C(C=C2)N)O</chem>                         | Non-Carcinogen |
| 464 | 1-Hydroxyanthraquinone                                                     | 129-43-1    | <chem>C1=CC=C2C(=C1)C(=O)C3=C(C2=O)C(=CC=C3)O</chem>                | Carcinogen     |
| 465 | 1-(2-Hydroxyethyl)-3-[(5-nitrofurfurylidene)amino]-2-imidazolidinone       | 5036-03-3   | <chem>C1CN(C(=O)N1CCO)/N=C/C2=CC=C(O2)[N+](=O)[O-]</chem>           | Carcinogen     |
| 466 | 1-(2-Hydroxyethyl)-nitroso-3-ethylurea                                     | 96724-45-7  | <chem>CCNC(=O)N(CCO)N=O</chem>                                      | Carcinogen     |
| 467 | 1-(2-Hydroxyethyl)-1-nitrosourea                                           | 13743-07-2  | <chem>C(CO)N(C(=O)N)N=O</chem>                                      | Carcinogen     |
| 468 | 4-(2-Hydroxyethylamino)-2-(5-nitro-2-thienyl)quinazolinone                 | 33389-36-5  | <chem>C1=CC=C2C(=C1)C(=NC(=N2)C3=CC=C(S3)[N+](=O)[O-])NCCO</chem>   | Carcinogen     |
| 469 | 1-(3-Hydroxypropyl)-1-nitrosourea                                          | 71752-70-0  | <chem>C(CN(C(=O)N)N=O)CO</chem>                                     | Carcinogen     |
| 470 | 8-Hydroxyquinoline                                                         | 148-24-3    | <chem>C1=CC2=C(C(=C1)O)N=CC=C2</chem>                               | Non-Carcinogen |
| 471 | 1'-Hydroxysafrole                                                          | 5208-87-7   | <chem>C=CC(C1=CC2=C(C=C1)OCO2)O</chem>                              | Carcinogen     |
| 472 | Ibuprofen                                                                  | 15687-27-1  | <chem>CC(C)CC1=CC=C(C=C1)C(C)C(=O)O</chem>                          | Non-Carcinogen |
| 473 | ICRF-159                                                                   | 21416-87-5  | <chem>CC(CN1CC(=O)NC(=O)C1)N2CC(=O)NC(=O)C2</chem>                  | Carcinogen     |
| 474 | 3-((Imino((2,2,2-trifluoroethyl)amino)methyl)amino)1H-pyrazole-1-pentamide | 84545-30-2  | <chem>C1=CN(N=C1NC(=NCC(F)(F)F)N)CCCCC(=O)N</chem>                  | Carcinogen     |
| 475 | 3,3'-Iminobis-1-propanoldimethanesulfonate(ester)                          | 3458-22-8   | <chem>CS(=O)(=O)OCCCNCCCOS(=O)(=O)C</chem>                          | Non-Carcinogen |
| 476 | Iminodiacetic acid                                                         | 32607-00-4  | <chem>C(C(=O)O)NCC(=O)[O-]</chem>                                   | Non-Carcinogen |
| 477 | Indole                                                                     | 120-72-9    | <chem>CC1(C2=C(C=CC(=C2)C3=NNC(=O)CC3)NC1=O)C</chem>                | Carcinogen     |
| 478 | Indomethacin                                                               | 53-86-1     | <chem>CC1=C(C2=C(N1C(=O)C3=CC=C(C=C3)Cl)C=C(C(=C2)OC)CC(=O)O</chem> | Carcinogen     |
| 479 | Iodinated glycerol                                                         | 5634-39-9   | <chem>CC(C1OCC(O1)CO)I</chem>                                       | Carcinogen     |
| 480 | Ipazilide fumarate                                                         | 115436-74-3 | <chem>CCN(CC)CCCNC(=O)CN1C(=C(C=N1)C2=CC=C(C=C2)C3=CC=CC=C3</chem>  | Non-Carcinogen |
| 481 | IQ                                                                         | 76180-96-6  | <chem>CN1C2=C(C3=C(C=C2)N=CC=C3)N=C1N</chem>                        | Carcinogen     |



|     |                                    |             |                                                                                                              |                |
|-----|------------------------------------|-------------|--------------------------------------------------------------------------------------------------------------|----------------|
| 503 | d-Limonene                         | 5989-27-5   | <chem>CC1=CC[C@@H](CC1)C(=C)C</chem>                                                                         | Carcinogen     |
| 504 | Lithocholic acid                   | 434-13-9    | <chem>C[C@H](CCC(=O)O)[C@H]1CC[C@@H]2[C@@]1(CC[C@H]3[C@H]2CC[C@H]4[C@@]3(CC[C@H](C4)O)C)C</chem>             | Non-Carcinogen |
| 505 | Lofexidine                         | 21498-08-8  | <chem>CC(C1=NCCN1)OC2=C(C=CC=C2Cl)Cl</chem>                                                                  | Non-Carcinogen |
| 506 | Lonidamine                         | 50264-69-2  | <chem>C1=CC=C2C(=C1)C(=NN2CC3=C(C=C(C=C3)Cl)Cl)C(=O)O</chem>                                                 | Non-Carcinogen |
| 507 | Lornoxicam                         | 70374-39-9  | <chem>CN1C(=C(C2=C(S1(=O)=O)C=C(S2)Cl)O)C(=O)N</chem><br><chem>C3=CC=CC=N3</chem>                            | Non-Carcinogen |
| 508 | Lovastatin                         | 75330-75-5  | <chem>CC[C@H](C)C(=O)O[C@H]1C[C@H](C=C2[C@H]1[C@H]([C@H]([C@H](C=C2)C)CC[C@@H]3[C@H](CC(=O)O3)O)C</chem>     | Non-Carcinogen |
| 509 | Loxidine                           | 76956-02-0  | <chem>CN1C(=NC(=N1)CO)NCCCOC2=CC=CC(=C2)C</chem><br><chem>N3CCCCC3</chem>                                    | Carcinogen     |
| 510 | Lupitidine                         | 72716-75-7  | <chem>CC1=NC=C(C=C1)CC2=CN=C(NC2=O)NCCSCC</chem><br><chem>3=CC=C(O3)CN(C)C</chem>                            | Carcinogen     |
| 511 | Malaoxon                           | 1634-78-2   | <chem>CCOC(=O)CC(C(=O)OCC)SP(=O)(OC)OC</chem>                                                                | Non-Carcinogen |
| 512 | Malathion                          | 121-75-5    | <chem>CCOC(=O)CC(C(=O)OCC)SP(=S)(OC)OC</chem>                                                                | Non-Carcinogen |
| 513 | Maleic hydrazide                   | 123-33-1    | <chem>C1=CC(=O)NNC1=O</chem>                                                                                 | Non-Carcinogen |
| 514 | Malonaldehyde                      | 24382-04-5  | <chem>C(=C/[O-])\C=O</chem>                                                                                  | Carcinogen     |
| 515 | Manganese ethylenebisthiocarbamate | 12427-38-2  | <chem>C(CNC(=S)[S-])NC(=S)[S-]</chem>                                                                        | Carcinogen     |
| 516 | Manidipine                         | 89226-75-5  | <chem>CC1=C(C(C(=C(N1)C)C(=O)OCCN2CCN(CC2)C(C3=CC=CC=C3)C4=CC=CC=C4)C5=CC(=CC=C5)[N+](=O)[O-])C(=O)OC</chem> | Non-Carcinogen |
| 517 | d-Mannitol                         | 69-65-8     | <chem>C([C@H]([C@H]([C@@H]([C@@H](CO)O)O)O)O)O</chem>                                                        | Non-Carcinogen |
| 518 | Mannitol nitrogen mustard          | 576-68-1    | <chem>C(CCl)NC[C@H]([C@H]([C@@H]([C@@H](CNCCC1)O)O)O)O</chem>                                                | Non-Carcinogen |
| 519 | MeA-alpha-C acetate                | 117831-29-5 | <chem>CC1=C(N=C2C(=C1)C3=CC=CC=C3N2)[NH3+]</chem>                                                            | Carcinogen     |
| 520 | MeIQx                              | 77500-04-0  | <chem>CC1=CN=C2C=CC3=C(C2=N1)N=C(N3C)N</chem>                                                                | Carcinogen     |
| 521 | Melamine                           | 108-78-1    | <chem>C1(=NC(=NC(=N1)N)N)N</chem>                                                                            | Carcinogen     |
| 522 | Meloxicam                          | 71125-38-7  | <chem>CC1=CN=C(S1)NC(=O)C2=C(C3=CC=CC=C3S(=O)(=O)N2C)O</chem>                                                | Non-Carcinogen |
| 523 | Melphalan                          | 148-82-3    | <chem>C1=CC(=CC=C1C[C@H](C(=O)O)N)N(CCC1)CC1</chem>                                                          | Carcinogen     |
| 524 | dl-Menthol                         | 15356-70-4  | <chem>CC1CCC(C(C1)O)C(C)C</chem>                                                                             | Non-Carcinogen |
| 525 | MER-25                             | 67-98-1     | <chem>CCN(CC)CCOC1=CC=C(C=C1)C(CC2=CC=C(C=C2)OC)(C3=CC=CC=C3)O</chem>                                        | Non-Carcinogen |
| 526 | 2-Mercaptobenzothiazole            | 149-30-4    | <chem>C1=CC=C2C(=C1)NC(=S)S2</chem>                                                                          | Carcinogen     |

|     |                                                      |            |                                                                                        |                |
|-----|------------------------------------------------------|------------|----------------------------------------------------------------------------------------|----------------|
|     | iazole                                               |            |                                                                                        |                |
| 527 | 6-Mercaptopurine                                     | 50-44-2    | <chem>C1=NC2=C(N1)C(=S)N=CN2</chem>                                                    | Non-Carcinogen |
| 528 | Metepa                                               | 57-39-6    | <chem>CC1CN1P(=O)(N2CC2C)N3CC3C</chem>                                                 | Carcinogen     |
| 529 | Methacrylonitrile                                    | 126-98-7   | <chem>CC(=C)C#N</chem>                                                                 | Non-Carcinogen |
| 530 | Methafurylene                                        | 531-06-6   | <chem>CN(C)CCN(CC1=CC=CO1)C2=CC=CC=N2</chem>                                           | Non-Carcinogen |
| 531 | Methaphenylene                                       | 493-78-7   | <chem>CN(C)CCN(CC1=CC=CS1)C2=CC=CC=C2</chem>                                           | Non-Carcinogen |
| 532 | Methapyrilene                                        | 135-23-9   | <chem>CN(C)CCN(CC1=CC=CS1)C2=CC=CC=N2</chem>                                           | Carcinogen     |
| 533 | Methimazole                                          | 60-56-0    | <chem>CN1C=CNC1=S</chem>                                                               | Carcinogen     |
| 534 | dl-Methionine                                        | 59-51-8    | <chem>CSCCC(C(=O)O)N</chem>                                                            | Non-Carcinogen |
| 535 | Methotrexate                                         | 59-05-2    | <chem>CN(CC1=CN=C2C(=N1)C(=NC(=N2)N)N)C3=CC=C(C=C3)C(=O)N[C@@H](CCC(=O)O)C(=O)O</chem> | Non-Carcinogen |
| 536 | 2-Methoxy-3-aminodibenzofuran                        | 5834-17-3  | <chem>COC1=C(C=C2C(=C1)C3=CC=CC=C3O2)N</chem>                                          | Carcinogen     |
| 537 | 3-Methoxycatechol                                    | 934-00-9   | <chem>COC1=CC=CC(=C1O)O</chem>                                                         | Carcinogen     |
| 538 | Methoxychlor                                         | 72-43-5    | <chem>COC1=CC=C(C=C1)C(C2=CC=C(C=C2)OC)C(Cl)(Cl)Cl</chem>                              | Non-Carcinogen |
| 539 | 4-Methoxyphenol                                      | 150-76-5   | <chem>COC1=CC=C(C=C1)O</chem>                                                          | Carcinogen     |
| 540 | 8-Methoxypsoralen                                    | 298-81-7   | <chem>COC1=C2C(=CC3=C1OC=C3)C=CC(=O)O2</chem>                                          | Carcinogen     |
| 541 | Z-Methyl-O,N,N-azoxyethane                           | 57497-34-4 | <chem>CCN=[N+](C)[O-]</chem>                                                           | Carcinogen     |
| 542 | Methyl tert-butyl ether                              | 1634-04-4  | <chem>CC(C)(C)OC</chem>                                                                | Carcinogen     |
| 543 | 2-Methyl-4-chlorophenoxyacetic acid                  | 94-74-6    | <chem>CC1=C(C=CC(=C1)Cl)OCC(=O)O</chem>                                                | Non-Carcinogen |
| 544 | Methyl clofenapate                                   | 21340-68-1 | <chem>CC(C)(C(=O)OC)OC1=CC=C(C=C1)C2=CC=C(C=C2)Cl</chem>                               | Carcinogen     |
| 545 | 3'-Methyl-4-dimethylaminoazobenzen e                 | 55-80-1    | <chem>CC1=CC(=CC=C1)N=NC2=CC=C(C=C2)N(C)C</chem>                                       | Carcinogen     |
| 546 | N-Methyl-N,4-dinitrosoaniline                        | 99-80-9    | <chem>CN(C1=CC=C(C=C1)N=O)N=O</chem>                                                   | Carcinogen     |
| 547 | methyl (9Z,11E)-13-hydroperoxyoctadeca-9,11-dienoate | NOCAS      | <chem>CCCCC/C=C/C=C\CCCCCCCC(=O)OC)OO</chem>                                           | Non-Carcinogen |
| 548 | Methyl linoleate                                     | 112-63-0   | <chem>CCCCC/C=C\C/C=C\CCCCCCCC(=O)OC</chem>                                            | Non-Carcinogen |
| 549 | Methyl methacrylate                                  | 80-62-6    | <chem>CC(=C)C(=O)OC</chem>                                                             | Non-Carcinogen |
| 550 | 2-Methyl-1-nitroanthraquinone                        | 129-15-7   | <chem>CC1=C(C2=C(C=C1)C(=O)C3=CC=CC=C3C2=O)[N+](=O)[O-]</chem>                         | Carcinogen     |
| 551 | 4-Methyl-1-[(5-nitrofurfurylidene)amino]             | 21638-36-8 | <chem>CC1CN(C(=O)N1)/N=C/C2=CC=C(O2)[N+](=O)[O-]</chem>                                | Carcinogen     |

|     |                                                |            |                                                                      |                |
|-----|------------------------------------------------|------------|----------------------------------------------------------------------|----------------|
|     | no]-2-imidazolidinone                          |            |                                                                      |                |
| 552 | 4-(4-N-Methyl-N-nitrosaminostyryl)quinoline    | 16699-10-8 | <chem>CN(C1=CC=C(C=C1)/C=C/C2=CC=NC3=CC=CC=C23)N=O</chem>            | Carcinogen     |
| 553 | N-Methyl-N-nitrosobenzamide                    | 63412-06-6 | <chem>CN(C(=O)C1=CC=CC=C1)N=O</chem>                                 | Carcinogen     |
| 554 | N-(N-Methyl-N-nitrosocarbamoyl)-l-ornithine    | 63642-17-1 | <chem>CN(C(=O)NCCCC[C@@H](C(=O)O)N)N=O</chem>                        | Carcinogen     |
| 555 | R(-)-2-Methyl-N-nitrosopiperidine              | 14026-03-0 | <chem>C[C@@H]1CCCCN1N=O</chem>                                       | Carcinogen     |
| 556 | S(+)-2-Methyl-N-nitrosopiperidine              | 36702-44-0 | <chem>C[C@H]1CCCCN1N=O</chem>                                        | Carcinogen     |
| 557 | Methyl parathion                               | 298-00-0   | <chem>COP(=S)(OC)OC1=CC=C(C=C1)[N+](=O)[O-]</chem>                   | Non-Carcinogen |
| 558 | N-Methyl-2-pyrrolidone                         | 872-50-4   | <chem>CN1CCCC1=O</chem>                                              | Non-Carcinogen |
| 559 | alpha-Methylbenzyl alcohol                     | 98-85-1    | <chem>CC(C1=CC=CC=C1)O</chem>                                        | Carcinogen     |
| 560 | 4-Methylcatechol                               | 452-86-8   | <chem>CC1=CC(=C(C=C1)O)O</chem>                                      | Carcinogen     |
| 561 | 3-Methylcholanthrene                           | 56-49-5    | <chem>CC1=C2CCC3=C2C(=CC4=C3C=CC5=CC=CC=C54)C=C1</chem>              | Carcinogen     |
| 562 | alpha-Methyldopas sesquihydrate                | 41372-08-1 | <chem>C[C@](CC1=CC(=C(C=C1)O)O)(C(=O)O)N</chem>                      | Non-Carcinogen |
| 563 | N-Methyldopamine, O,O'-diisobutyryl ester      | 75011-65-3 | <chem>CC(C)C(=O)OC1=C(C=C(C=C1)CCNC)OC(=O)C(C)C</chem>               | Non-Carcinogen |
| 564 | 4,4'-Methylene-bis(2-methylaniline)            | 838-88-0   | <chem>CC1=C(C=CC(=C1)CC2=CC(=C(C=C2)N)C)N</chem>                     | Carcinogen     |
| 565 | 4,4'-Methylenebis(N,N-dimethyl)benzenamine     | 101-61-1   | <chem>CN(C)C1=CC=C(C=C1)CC2=CC=C(C=C2)N(C)C</chem>                   | Carcinogen     |
| 566 | 2,2'-Methylenebis(4-methyl-6-tert-butylphenol) | 119-47-1   | <chem>CC1=CC(=C(C(=C1)C(C)(C)C)O)CC2=C(C(=CC(=C2)C)C(C)(C)C)O</chem> | Non-Carcinogen |
| 567 | 4,4'-Methylenedianiline                        | 13552-44-8 | <chem>C1=CC(=CC=C1CC2=CC=C(C=C2)N)N</chem>                           | Carcinogen     |
| 568 | Methylethylketoxime                            | 96-29-7    | <chem>CC/C(=N/O)/C</chem>                                            | Carcinogen     |
| 569 | Methylguanidine                                | 471-29-4   | <chem>COC1=C(C=C(C=C1)CC=C)OC</chem>                                 | Carcinogen     |
| 570 | 7-Methylguanine                                | 578-76-7   | <chem>CN1C=NC2=C1C(=O)N=C(N2)N</chem>                                | Non-Carcinogen |
| 571 | Methylhydroquinone                             | 95-71-6    | <chem>CC1=C(C=CC(=C1)O)O</chem>                                      | Non-Carcinogen |





|     |                                                                 |            |                                                           |                |
|-----|-----------------------------------------------------------------|------------|-----------------------------------------------------------|----------------|
|     | rylidene)amino]-2-oxazolidinone                                 |            |                                                           |                |
| 594 | Myleran                                                         | 55-98-1    | <chem>CS(=O)(=O)OCCCCOS(=O)(=O)C</chem>                   | Non-Carcinogen |
| 595 | Nafenopin                                                       | 3771-19-5  | <chem>CC(C)(C(=O)O)OC1=CC=C(C=C1)C2CCCC3=CC=CC=C23</chem> | Carcinogen     |
| 596 | Nalidixic acid                                                  | 389-08-2   | <chem>CCN1C=C(C(=O)C2=C1N=C(C=C2)C)C(=O)O</chem>          | Carcinogen     |
| 597 | Naphthalene                                                     | 91-20-3    | <chem>C1=CC=C2C=CC=CC2=C1</chem>                          | Carcinogen     |
| 598 | 1,5-Naphthalenediamine                                          | 2243-62-1  | <chem>C1=CC2=C(C=CC=C2N)C(=C1)N</chem>                    | Carcinogen     |
| 599 | N-(1-Naphthyl)ethylenediamine                                   | 1465-25-4  | <chem>C1=CC=C2C(=C1)C=CC=C2NCCN</chem>                    | Non-Carcinogen |
| 600 | 2-Naphthylamine                                                 | 91-59-8    | <chem>C1=CC=C2C=C(C=CC2=C1)N</chem>                       | Carcinogen     |
| 601 | Nefiracetam                                                     | 77191-36-7 | <chem>CC1=C(C(=CC=C1)C)NC(=O)CN2CCCC2=O</chem>            | Non-Carcinogen |
| 602 | Nicotine                                                        | 54-11-5    | <chem>CN1CCC[C@H]1C2=CN=CC=C2</chem>                      | Non-Carcinogen |
| 603 | Nithiazide                                                      | 139-94-6   | <chem>CCNC(=O)NC1=NC=C(S1)[N+](=O)[O-]</chem>             | Carcinogen     |
| 604 | Nitrilotriacetic acid                                           | 139-13-9   | <chem>C(C(=O)O)N(CC(=O)O)CC(=O)O</chem>                   | Carcinogen     |
| 605 | Nitrilotriacetic acid                                           | 18662-53-8 | <chem>C(C(=O)[O-])N(CC(=O)[O-])CC(=O)[O-]</chem>          | Carcinogen     |
| 606 | 3-Nitro-p-acetophenetide                                        | 1777-84-0  | <chem>CCOC1=C(C=C(C=C1)NC(=O)C)[N+](=O)[O-]</chem>        | Non-Carcinogen |
| 607 | 5-Nitro-o-anisidine                                             | 99-59-2    | <chem>COC1=C(C=C(C=C1)[N+](=O)[O-])N</chem>               | Carcinogen     |
| 608 | 5-Nitro-2-furaldehyde semicarbazone                             | 59-87-0    | <chem>C1=C(OC(=C1)[N+](=O)[O-])/C=N/NC(=O)N</chem>        | Carcinogen     |
| 609 | 5-Nitro-2-furamide                                              | 772-43-0   | <chem>C1=C(OC(=C1)[N+](=O)[O-])/C(=N/O)/N</chem>          | Non-Carcinogen |
| 610 | 5-Nitro-2-furanmethanediol diacetate                            | 92-55-7    | <chem>CC(=O)OC(C1=CC=C(O1)[N+](=O)[O-])OC(=O)C</chem>     | Non-Carcinogen |
| 611 | 3-(5-Nitro-2-furyl)-imidazo(1,2-alpha)pyridine                  | 75198-31-1 | <chem>C1=CC2=NC=C(N2C=C1)C3=CC=C(O3)[N+](=O)[O-]</chem>   | Carcinogen     |
| 612 | 5-(5-Nitro-2-furyl)-1,3,4-oxadiazole-2-ol                       | 2122-86-3  | <chem>C1=C(OC(=C1)[N+](=O)[O-])C2=NNC(=O)O2</chem>        | Carcinogen     |
| 613 | N-[[3-(5-Nitro-2-furyl)-1,2,4-oxadiazole-5-yl]-methyl]acetamide | 36133-88-7 | <chem>CC(=O)NCC1=NC(=NO1)C2=CC=C(O2)[N+](=O)[O-]</chem>   | Carcinogen     |
| 614 | N-[5-(5-Nitro-2-furyl)-1,3,4-thiadiazol-2-yl]acetamide          | 2578-75-8  | <chem>CC(=O)NC1=NN=C(S1)C2=CC=C(O2)[N+](=O)[O-]</chem>    | Carcinogen     |
| 615 | 4-(5-Nitro-2-furyl)thiazole                                     | 53757-28-1 | <chem>C1=C(OC(=C1)[N+](=O)[O-])C2=CSC=N2</chem>           | Carcinogen     |
| 616 | N-[4-(5-Nitro-2-fur                                             | 531-82-8   | <chem>CC(=O)NC1=NC(=CS1)C2=CC=C(O2)[N+](=O)[</chem>       | Carcinogen     |

|     |                                                            |            |                                                                   |                |
|-----|------------------------------------------------------------|------------|-------------------------------------------------------------------|----------------|
|     | yl)-2-thiazolyl]acetamide                                  |            | O-]                                                               |                |
| 617 | N-[4-(5-Nitro-2-furyl)-2-thiazolyl]formamide               | 24554-26-5 | <chem>C1=C(OC(=C1)[N+](=O)[O-])C2=CSC(=N2)NC=O</chem>             | Carcinogen     |
| 618 | N,N'-[6-(5-Nitro-2-furyl)-S-triazine-2,4-diyl]bisacetamide | 51325-35-0 | <chem>CC(=O)NC1=NC(=NC(=N1)C2=CC=C(O2)[N+](=O)[O-])NC(=O)C</chem> | Carcinogen     |
| 619 | 3-Nitro-3-hexene                                           | 4812-22-0  | <chem>CC/C=C(/CC)\[N+](=O)[O-]</chem>                             | Carcinogen     |
| 620 | 2-Nitro-p-phenylenediamine                                 | 5307-14-2  | <chem>C1=CC(=C(C=C1N)[N+](=O)[O-])N</chem>                        | Non-Carcinogen |
| 621 | 4-Nitro-o-phenylenediamine                                 | 99-56-9    | <chem>C1=CC(=C(C=C1[N+](=O)[O-])N)N</chem>                        | Non-Carcinogen |
| 622 | 5-Nitro-o-toluidine                                        | 99-55-8    | <chem>CC1=C(C=C(C=C1)[N+](=O)[O-])N</chem>                        | Non-Carcinogen |
| 623 | 5-Nitroacenaphthene                                        | 602-87-9   | <chem>C1CC2=CC=CC3=C(C=CC1=C23)[N+](=O)[O-]</chem>                | Carcinogen     |
| 624 | p-Nitroaniline                                             | 100-01-6   | <chem>C1=CC(=CC=C1N)[N+](=O)[O-]</chem>                           | Non-Carcinogen |
| 625 | o-Nitroanisole                                             | 91-23-6    | <chem>COC1=CC=CC=C1[N+](=O)[O-]</chem>                            | Carcinogen     |
| 626 | 4-Nitroanthranilic acid                                    | 619-17-0   | <chem>C1=CC(=C(C=C1[N+](=O)[O-])N)C(=O)O</chem>                   | Non-Carcinogen |
| 627 | Nitrobenzene                                               | 98-95-3    | <chem>C1=CC=C(C=C1)[N+](=O)[O-]</chem>                            | Carcinogen     |
| 628 | 6-Nitrobenzimidazole                                       | 94-52-0    | <chem>C1=CC2=C(C=C1[N+](=O)[O-])NC=N2</chem>                      | Non-Carcinogen |
| 629 | p-Nitrobenzoic acid                                        | 62-23-7    | <chem>C1=CC(=CC=C1C(=O)O)[N+](=O)[O-]</chem>                      | Carcinogen     |
| 630 | 1-Nitrobutane                                              | 627-05-4   | <chem>CCCC[N+](=O)[O-]</chem>                                     | Non-Carcinogen |
| 631 | 2-Nitrobutane                                              | 600-24-8   | <chem>CCC(C)[N+](=O)[O-]</chem>                                   | Carcinogen     |
| 632 | Nitrofen                                                   | 1836-75-5  | <chem>C1=CC(=CC=C1[N+](=O)[O-])OC2=C(C=C(C=C2)C1)Cl</chem>        | Carcinogen     |
| 633 | 2-Nitrofluorene                                            | 607-57-8   | <chem>C1C2=CC=CC=C2C3=C1C=C(C=C3)[N+](=O)[O-]</chem>              | Carcinogen     |
| 634 | 1-[(5-Nitrofurfurylidene)amino]hydantoin                   | 67-20-9    | <chem>C1C(=O)NC(=O)N1/N=C/C2=CC=C(O2)[N+](=O)[O-]</chem>          | Carcinogen     |
| 635 | 1-[(5-Nitrofurfurylidene)amino]-2-imidazolidinone          | 555-84-0   | <chem>C1CN(C(=O)N1)/N=C/C2=CC=C(O2)[N+](=O)[O-]</chem>            | Carcinogen     |
| 636 | Nitrogen mustard                                           | 51-75-2    | <chem>CN(CCCl)CCCl</chem>                                         | Carcinogen     |
| 637 | Nitrogen mustard N-oxide                                   | 126-85-2   | <chem>C[N+](CCCl)(CCCl)[O-]</chem>                                | Carcinogen     |
| 638 | 1-Nitronaphthalene                                         | 86-57-7    | <chem>C1=CC=C2C(=C1)C=CC=C2[N+](=O)[O-]</chem>                    | Non-Carcinogen |

|     |                                                    |            |                                                                 |                |
|-----|----------------------------------------------------|------------|-----------------------------------------------------------------|----------------|
| 639 | 3-Nitropentane                                     | 551-88-2   | <chem>CCC(CC)[N+](=O)[O-]</chem>                                | Carcinogen     |
| 640 | 1-Nitropropane                                     | 108-03-2   | <chem>CCC[N+](=O)[O-]</chem>                                    | Non-Carcinogen |
| 641 | 2-Nitropropane                                     | 79-46-9    | <chem>CC(C)[N+](=O)[O-]</chem>                                  | Non-Carcinogen |
| 642 | 3-Nitropropionic acid                              | 504-88-1   | <chem>C(C[N+](=O)[O-])C(=O)O</chem>                             | Non-Carcinogen |
| 643 | 1-Nitropyrene                                      | 5522-43-0  | <chem>C1=CC2=C3C(=C1)C=CC4=C(C=CC(=C43)C=C2)[N+](=O)[O-]</chem> | Carcinogen     |
| 644 | 6-Nitroquinoline                                   | 613-50-3   | <chem>C1=CC2=C(C=CC(=C2)[N+](=O)[O-])N=C1</chem>                | Non-Carcinogen |
| 645 | 8-Nitroquinoline                                   | 607-35-2   | <chem>C1=CC2=C(C(=C1)[N+](=O)[O-])N=CC=C2</chem>                | Carcinogen     |
| 646 | Nitroso-Baygon                                     | 38777-13-8 | <chem>CC(C)OC1=CC=CC=C1OC(=O)N(C)N=O</chem>                     | Carcinogen     |
| 647 | N-Nitroso-bis-(4,4,4-trifluoro-N-butyl)amine       | 83335-32-4 | <chem>C(CC(F)(F)F)CN(CCCC(F)(F)F)N=O</chem>                     | Carcinogen     |
| 648 | 1-Nitroso-5,6-dihydrothymine                       | 62641-67-2 | <chem>CC1CN(C(=O)NC1=O)N=O</chem>                               | Non-Carcinogen |
| 649 | 1-Nitroso-5,6-dihydrouracil                        | 16813-36-8 | <chem>C1CN(C(=O)NC1=O)N=O</chem>                                | Carcinogen     |
| 650 | N-Nitroso-2,3-dihydroxypropyl-2-hydroxypropylamine | 89911-79-5 | <chem>CC(CN(CC(CO)O)N=O)O</chem>                                | Carcinogen     |
| 651 | Nitroso-2,3-dihydroxypropyl-2-oxopropylamine       | 92177-50-9 | <chem>CC(=O)CN(CC(CO)O)N=O</chem>                               | Carcinogen     |
| 652 | N-Nitroso-2,3-dihydroxypropylethanolamine          | 89911-78-4 | <chem>C(CO)N(CC(CO)O)N=O</chem>                                 | Carcinogen     |
| 653 | 1-Nitroso-3,5-dimethyl-4-benzoylpyridazine         | 61034-40-0 | <chem>CC1CN(CC(N1C(=O)C2=CC=CC=C2)C)N=O</chem>                  | Carcinogen     |
| 654 | 1-Nitroso-1-hydroxyethyl-3-chloroethylurea         | 96806-34-7 | <chem>C(CCl)NC(=O)N(CCO)N=O</chem>                              | Carcinogen     |
| 655 | N-Nitroso-2-hydroxymorpholine                      | 67587-52-4 | <chem>C1COC(CN1N=O)O</chem>                                     | Non-Carcinogen |
| 656 | 1-Nitroso-1-(2-hydroxypropyl)-3-chloroethylurea    | 96806-35-8 | <chem>CC(CN(C(=O)NCCCl)N=O)O</chem>                             | Carcinogen     |
| 657 | N-Nitroso-(2-hydroxypropyl)-(2-hydroxyethyl)amine  | 75896-33-2 | <chem>CC(CN(CCO)N=O)O</chem>                                    | Carcinogen     |
| 658 | N-Nitroso-3-hydroxypropylrolidine                  | 56222-35-6 | <chem>C1CN(CC1O)N=O</chem>                                      | Carcinogen     |

|     |                                                        |            |                                               |                |
|-----|--------------------------------------------------------|------------|-----------------------------------------------|----------------|
| 659 | N-Nitroso-N-isobutylurea                               | 760-60-1   | <chem>CC(C)CN(C(=O)N)N=O</chem>               | Carcinogen     |
| 660 | N-Nitroso-N-methyl-N-dodecylamine                      | 55090-44-3 | <chem>CCCCCCCCCCCCCN(C)N=O</chem>             | Carcinogen     |
| 661 | N-Nitroso-N-methyl-4-fluoroaniline                     | 937-25-7   | <chem>CN(C1=CC=C(C=C1)F)N=O</chem>            | Carcinogen     |
| 662 | N-Nitroso-N-methyl-4-nitroaniline                      | 943-41-9   | <chem>CN(C1=CC=C(C=C1)[N+](=O)[O-])N=O</chem> | Non-Carcinogen |
| 663 | Nitroso-N-methyl-N-(2-phenyl)ethylamine                | 13256-11-6 | <chem>CN(CCC1=CC=CC=C1)N=O</chem>             | Carcinogen     |
| 664 | N-Nitroso-N-methyl-N-tetradecylamine                   | 75881-20-8 | <chem>CCCCCCCCCCCCCCN(C)N=O</chem>            | Carcinogen     |
| 665 | N-Nitroso-N-methyldecylamine                           | 75881-22-0 | <chem>CCCCCCCCCCN(C)N=O</chem>                | Carcinogen     |
| 666 | 3-Nitroso-2-oxazolidinone                              | 38347-74-9 | <chem>C1COC(=O)N1N=O</chem>                   | Carcinogen     |
| 667 | Nitroso-2-oxopropylethanolamine                        | 92177-49-6 | <chem>CC(=O)CN(CCO)N=O</chem>                 | Carcinogen     |
| 668 | di(N-Nitroso)-perhydropyrimidine                       | 15973-99-6 | <chem>C1CN(CN(C1)N=O)N=O</chem>               | Carcinogen     |
| 669 | Nitroso-1,2,3,6-tetrahydropyridine                     | 55556-92-8 | <chem>C1CN(CC=C1)N=O</chem>                   | Carcinogen     |
| 670 | N-Nitroso(2,2,2-trifluoroethyl)ethylamine              | 82018-90-4 | <chem>CCN(CC(F)(F)F)N=O</chem>                | Carcinogen     |
| 671 | N-Nitroso-2,2,4-trimethyl-1,2-dihydroquinoline polymer | 29929-77-9 | <chem>CC1=CC(N(C2=CC=CC=C12)N=O)(C)C</chem>   | Carcinogen     |
| 672 | 1-Nitroso-3,4,5-trimethylpiperazine                    | 75881-18-4 | <chem>CC1CN(CC(N1C)C)N=O</chem>               | Carcinogen     |
| 673 | N-Nitrosoallyl-2,3-dihydroxypropylamine                | 88208-16-6 | <chem>C=CCN(CC(O)O)N=O</chem>                 | Carcinogen     |
| 674 | N-Nitrosoallyl-2-hydroxypropylamine                    | 91308-70-2 | <chem>CC(CN(CC=C)N=O)O</chem>                 | Carcinogen     |
| 675 | N-Nitrosoallyl-2-oxopropylamine                        | 91308-71-3 | <chem>CC(=O)CN(CC=C)N=O</chem>                | Carcinogen     |
| 676 | N-Nitrosoallylethanolamine                             | 91308-69-9 | <chem>C=CCN(CCO)N=O</chem>                    | Carcinogen     |

|     |                                         |             |                                               |                |
|-----|-----------------------------------------|-------------|-----------------------------------------------|----------------|
| 677 | Nitrosoamylurethane                     | 64005-62-5  | <chem>CCCCCN(C(=O)OCC)N=O</chem>              | Carcinogen     |
| 678 | Nitrosoanabasine                        | 1133-64-8   | <chem>C1CCN(C(C1)C2=CN=CC=C2)N=O</chem>       | Carcinogen     |
| 679 | N-Nitrosobenzthiazuron                  | 51542-33-7  | <chem>CN(C(=O)NC1=NC2=CC=CC=C2S1)N=O</chem>   | Carcinogen     |
| 680 | N-Nitrosobis(2-hydroxypropyl)amine      | 53609-64-6  | <chem>CC(CN(CC(C)O)N=O)O</chem>               | Carcinogen     |
| 681 | N-Nitrosobis(2-oxopropyl)amine          | 60599-38-4  | <chem>CC(=O)CN(CC(=O)C)N=O</chem>             | Carcinogen     |
| 682 | N-Nitrosobis(2,2,2-trifluoroethyl)amine | 625-89-8    | <chem>C(C(F)(F)F)N(CC(F)(F)F)N=O</chem>       | Non-Carcinogen |
| 683 | Nitrosochloridiazepoxide                | 51715-17-4  | <chem>CC1=C(N=CN1)CSCCN=C(NC#N)N(C)N=O</chem> | Non-Carcinogen |
| 684 | Nitrosodibutylamine                     | 924-16-3    | <chem>CCCCN(CCCC)N=O</chem>                   | Carcinogen     |
| 685 | N-Nitrosodiethanolamine                 | 1116-54-7   | <chem>C(CO)N(CCO)N=O</chem>                   | Carcinogen     |
| 686 | N-Nitrosodiethylamine                   | 55-18-5     | <chem>CCN(CC)N=O</chem>                       | Carcinogen     |
| 687 | N-Nitrosodiphenylamine                  | 86-30-6     | <chem>C1=CC=C(C=C1)N(C2=CC=CC=C2)N=O</chem>   | Carcinogen     |
| 688 | p-Nitrosodiphenylamine                  | 156-10-5    | <chem>C1=CC=C(C=C1)NC2=CC=C(C=C2)N=O</chem>   | Carcinogen     |
| 689 | N-Nitrosodipropylamine                  | 621-64-7    | <chem>CCCN(CCC)N=O</chem>                     | Carcinogen     |
| 690 | N-Nitrosodithiazine                     | 114282-83-6 | <chem>C1N(CSCS1)N=O</chem>                    | Non-Carcinogen |
| 691 | Nitrosododecamethyleneimine             | 40580-89-0  | <chem>C1CCCCCCN(CCCCC1)N=O</chem>             | Carcinogen     |
| 692 | N-Nitrosoephedrine                      | 17608-59-2  | <chem>CC(C(C1=CC=CC=C1)O)N(C)N=O</chem>       | Carcinogen     |
| 693 | Nitrosoethylmethylamine                 | 10595-95-6  | <chem>CCN(C)N=O</chem>                        | Carcinogen     |
| 694 | Nitrosoethylurethane                    | 614-95-9    | <chem>CCN(C(=O)OCC)N=O</chem>                 | Carcinogen     |
| 695 | N-Nitrosoguvacoline                     | 55557-02-3  | <chem>COC(=O)C1=CCCN(C1)N=O</chem>            | Non-Carcinogen |
| 696 | Nitrosoheptamethyleneimine              | 20917-49-1  | <chem>C1CCCN(CCC1)N=O</chem>                  | Carcinogen     |
| 697 | 1-Nitrosohydantoin                      | 42579-28-2  | <chem>C1C(=O)NC(=O)N1N=O</chem>               | Carcinogen     |
| 698 | Nitrosohydroxypro                       | 30310-80-6  | <chem>C1[C@H](CN([C@@H]1C(=O)O)N=O)O</chem>   | Non-Carcinogen |

|     |                                            |            |                                                 |                |
|-----|--------------------------------------------|------------|-------------------------------------------------|----------------|
|     | line                                       |            |                                                 |                |
| 699 | Nitrosoiminodiacetic acid                  | 25081-31-6 | <chem>C(C(=O)O)N(CC(=O)O)N=O</chem>             | Non-Carcinogen |
| 700 | Nitrosomethyl-3-carboxypropylamine         | 61445-55-4 | <chem>CN(CCCC(=O)O)N=O</chem>                   | Carcinogen     |
| 701 | N-Nitrosomethyl-2,3-dihydroxypropylamine   | 86451-37-8 | <chem>CN(CC(CO)O)N=O</chem>                     | Carcinogen     |
| 702 | N-Nitrosomethyl-(2-hydroxyethyl)amine      | 26921-68-6 | <chem>CN(CCO)N=O</chem>                         | Carcinogen     |
| 703 | N-Nitrosomethyl-(3-hydroxypropyl)amine     | 70415-59-7 | <chem>CN(CCCO)N=O</chem>                        | Carcinogen     |
| 704 | N-Nitrosomethyl-2-hydroxypropylamine       | 75411-83-5 | <chem>CC(CN(C)N=O)O</chem>                      | Carcinogen     |
| 705 | N-Nitrosomethyl(2-oxopropyl)amine          | 55984-51-5 | <chem>CC(=O)CN(C)N=O</chem>                     | Carcinogen     |
| 706 | N-Nitrosomethyl-(2-tosyloxyethyl)amine     | NOCAS      | <chem>CC1=CC=C(C=C1)S(=O)(=O)OCCN(C)N=O</chem>  | Carcinogen     |
| 707 | 2-Nitrosomethylaminopyridine               | 16219-98-0 | <chem>CN(C1=CC=CC=N1)N=O</chem>                 | Carcinogen     |
| 708 | 3-Nitrosomethylaminopyridine               | 69658-91-9 | <chem>CN(C1=CN=CC=C1)N=O</chem>                 | Non-Carcinogen |
| 709 | 4-Nitrosomethylaminopyridine               | 16219-99-1 | <chem>CN(C1=CC=NC=C1)N=O</chem>                 | Non-Carcinogen |
| 710 | Nitrosomethylaniline                       | 614-00-6   | <chem>CN(C1=CC=CC=C1)N=O</chem>                 | Carcinogen     |
| 711 | Nitrosomethylundecylamine                  | 68107-26-6 | <chem>CCCCCCCCCCCN(C)N=O</chem>                 | Carcinogen     |
| 712 | N-Nitrosomorpholine                        | 59-89-2    | <chem>C1COCCN1N=O</chem>                        | Carcinogen     |
| 713 | N <sup>1</sup> -Nitrosornicotine           | 53759-22-1 | <chem>C1CC(N(C1)N=O)C2=CN=CC=C2</chem>          | Carcinogen     |
| 714 | N <sup>1</sup> -Nitrosornicotine-1-N-oxide | 78246-24-9 | <chem>C1CC(N(C1)N=O)C2=C[N+](=CC=C2)[O-]</chem> | Carcinogen     |
| 715 | Nitrosopiperic acid                        | 4515-18-8  | <chem>C1CCN(C(C1)C(=O)O)N=O</chem>              | Non-Carcinogen |
| 716 | N-Nitrosopiperazine                        | 5632-47-3  | <chem>C1CN(CCN1)N=O</chem>                      | Carcinogen     |

|     |                                |             |                                                                                                                        |                |
|-----|--------------------------------|-------------|------------------------------------------------------------------------------------------------------------------------|----------------|
| 717 | N-Nitrosopiperidine            | 100-75-4    | C1CCN(CC1)N=O                                                                                                          | Carcinogen     |
| 718 | Nitrosoproline                 | 7519-36-0   | C1C[C@H](N(C1)N=O)C(=O)O                                                                                               | Non-Carcinogen |
| 719 | N-Nitrosopyrrolidine           | 930-55-2    | C1CCN(C1)N=O                                                                                                           | Carcinogen     |
| 720 | N-Nitrosothialdine             | 81795-07-5  | CC1N(C(SC(S1)C)C)N=O                                                                                                   | Carcinogen     |
| 721 | N-Nitrosothiomorpholine        | 26541-51-5  | C1CSCCN1N=O                                                                                                            | Carcinogen     |
| 722 | o-Nitrosotoluene               | 611-23-4    | CC1=CC=CC=C1N=O                                                                                                        | Carcinogen     |
| 723 | o-Nitrotoluene                 | 88-72-2     | CC1=CC=CC=C1[N+](=O)[O-]                                                                                               | Carcinogen     |
| 724 | p-Nitrotoluene                 | 99-99-0     | CC1=CC=C(C=C1)[N+](=O)[O-]                                                                                             | Carcinogen     |
| 725 | Norharman                      | 244-63-3    | C1=CC=C2C(=C1)C3=C(N2)C=NC=C3                                                                                          | Non-Carcinogen |
| 726 | Norlestrin                     | 51-98-9     | CC(=O)O[C@]1(CC[C@@H]2[C@@]1(CC[C@H]3[C@H]2CCC4=CC(=O)CC[C@H]34)C)C#C                                                  | Carcinogen     |
| 727 | Novadelox                      | 94-36-0     | C1=CC=C(C=C1)C(=O)OOC(=O)C2=CC=CC=C2                                                                                   | Non-Carcinogen |
| 728 | Ochratoxin A                   | 303-47-9    | C[C@@H]1CC2=C(C=C(C(=C2C(=O)O1)O)C(=O)N[C@@H](CC3=CC=CC=C3)C(=O)O)Cl                                                   | Carcinogen     |
| 729 | Octachlorostyrene              | 29082-74-4  | C1(=C(C(=C(C(=C1Cl)Cl)Cl)Cl)Cl)C(=C(Cl)Cl)Cl                                                                           | Non-Carcinogen |
| 730 | Oleate                         | 143-19-1    | CCCCCCCC/C=C\CCCCCCCC(=O)[O-]                                                                                          | Non-Carcinogen |
| 731 | Oltipraz                       | 64224-21-1  | CC1=C(SSC1=S)C2=NC=CN=C2                                                                                               | Non-Carcinogen |
| 732 | Omeprazole                     | 73590-58-6  | CC1=CN=C(C(=C1OC)C)CS(=O)C2=NC3=C(N2)C=C(C=C3)OC                                                                       | Carcinogen     |
| 733 | C.I. acid orange 3             | 6373-74-6   | C1=CC=C(C=C1)NC2=C(C=C(C=C2)NC3=C(C=C(C=C3)[N+](=O)[O-])[N+](=O)[O-])S(=O)(=O)[O-]                                     | Carcinogen     |
| 734 | C.I. acid orange 10            | 1936-15-8   | C1=CC=C(C=C1)N/N=C/2\C(=O)C=CC3=CC(=C(C=C32)S(=O)(=O)[O-])S(=O)(=O)[O-]                                                | Non-Carcinogen |
| 735 | Orotic acid                    | 154-85-8    | C1=C(NC(=O)NC1=O)C(=O)[O-]                                                                                             | Non-Carcinogen |
| 736 | gamma-Oryzanol                 | 11042-64-1  | C[C@H](CCC=C(C)C)[C@H]1CC[C@@]2([C@@]1(CC[C@]34[C@H]2CC[C@@H]5[C@]3(C4)CC[C@@H](C5(C)C)OC(=O)/C=C/C6=CC(=C(C=C6)O)OC)C | Non-Carcinogen |
| 737 | Osutidine                      | 140695-21-2 | CNCC1=CC=C(O1)CSCCNC(=NCC(C2=CC=C(C=C2)O)O)NS(=O)(=O)C                                                                 | Non-Carcinogen |
| 738 | Oxamyl                         | 23135-22-0  | CNC(=O)O/N=C(/C(=O)N(C)C)\SC                                                                                           | Non-Carcinogen |
| 739 | Oxazepam                       | 604-75-1    | C1=CC=C(C=C1)C2=NC(C(=O)NC3=C2C=C(C=C3)Cl)O                                                                            | Non-Carcinogen |
| 740 | N-(9-Oxo-2-fluorenyl)acetamide | 3096-50-2   | CC(=O)NC1=CC2=C(C=C1)C3=CC=CC=C3C2=O                                                                                   | Carcinogen     |
| 741 | Oxolinic acid                  | 14698-29-4  | CCN1C=C(C(=O)C2=CC3=C(C=C21)OCO3)C(=O)O                                                                                | Carcinogen     |
| 742 | 1-(2-Oxopropyl)nit             | 110559-85-8 | CC(=O)CN(C(=O)NCCCl)N=O                                                                                                | Non-Carcinogen |



|     |                                                          |            |                                                                                                                                                    |                |
|-----|----------------------------------------------------------|------------|----------------------------------------------------------------------------------------------------------------------------------------------------|----------------|
|     | roso-3-(2-chloroethyl)urea                               |            |                                                                                                                                                    |                |
| 743 | 2-Oxopropylnitrosourea                                   | 89837-93-4 | <chem>CC(=O)CN(C(=O)N)N=O</chem>                                                                                                                   | Non-Carcinogen |
| 744 | 1'-Oxosafrole                                            | 30418-53-2 | <chem>C=CC(=O)C1=CC2=C(C=C1)OCO2</chem>                                                                                                            | Non-Carcinogen |
| 745 | Oxprenolol                                               | 6452-73-9  | <chem>CC(C)NCC(COC1=CC=CC=C1OCC=C)O</chem>                                                                                                         | Non-Carcinogen |
| 746 | 4,4'-Oxydianiline                                        | 101-80-4   | <chem>C1=CC(=CC=C1N)OC2=CC=C(C=C2)N</chem>                                                                                                         | Carcinogen     |
| 747 | N-Oxydiethylene thiocarbamyl-N-oxydiethylene sulfenamide | 13752-51-7 | <chem>C1COCCN1C(=S)SN2CCOCC2</chem>                                                                                                                | Carcinogen     |
| 748 | Oxymetholone                                             | 434-07-1   | <chem>C[C@]12CC[C@H]3[C@H]([C@@H]1CC[C@]2(C)O)CC[C@@H]4[C@@]3(C/C(=C/O)/C(=O)C4)C</chem>                                                           | Carcinogen     |
| 749 | Oxytetracycline                                          | 2058-46-0  | <chem>C[C@@]1([C@H]2[C@@H]([C@H]3[C@@H](C(=O)C(=C([C@]3(C(=O)C2=C(C4=C1C=CC=C4O)O)O)C(=O)N)N(C)C)O)O)C1=C(C(C(=C(N1)C)C(=O)OCC(C)(C)CN(C)CC</chem> | Non-Carcinogen |
| 750 | Palonidipine                                             | 96515-74-1 | <chem>2=CC=CC=C2)C3=C(C=CC(=C3)[N+](=O)[O-])F)C(=O)OC</chem>                                                                                       | Non-Carcinogen |
| 751 | Parathion                                                | 56-38-2    | <chem>CCOP(=S)(OCC)OC1=CC=C(C=C1)[N+](=O)[O-]</chem>                                                                                               | Non-Carcinogen |
| 752 | Patulin                                                  | 149-29-1   | <chem>C1C=C2C(=CC(=O)O2)C(O1)O</chem>                                                                                                              | Non-Carcinogen |
| 753 | Penicillin VK                                            | 132-98-9   | <chem>CC1([C@@H](N2[C@H](S1)[C@@H](C2=O)NC(=O)COC3=CC=CC=C3)C(=O)[O-])C</chem>                                                                     | Non-Carcinogen |
| 754 | Pentachloroanisole                                       | 1825-21-4  | <chem>COC1=C(C(=C(C(=C1Cl)Cl)Cl)Cl)Cl</chem>                                                                                                       | Carcinogen     |
| 755 | Pentachloronitrobenzene                                  | 82-68-8    | <chem>C1(=C(C(=C(C(=C1Cl)Cl)Cl)Cl)Cl)[N+](=O)[O-]</chem>                                                                                           | Non-Carcinogen |
| 756 | Pentaerythritol tetranitrate                             | 78-11-5    | <chem>C(C(CO[N+](=O)[O-])(CO[N+](=O)[O-])CO[N+](=O)[O-])O[N+](=O)[O-]</chem>                                                                       | Non-Carcinogen |
| 757 | N-Pentyl-N'-nitro-N-nitrosoguanidine                     | 13010-10-1 | <chem>CCCCCN(/C(=N/[N+](=O)[O-])/N)N=O</chem>                                                                                                      | Non-Carcinogen |
| 758 | Perhexiline maleate                                      | 6724-53-4  | <chem>C1CCC(CC1)C(CC2CCCN2)C3CCCCC3</chem>                                                                                                         | Non-Carcinogen |
| 759 | Petasitenine                                             | 60102-37-6 | <chem>C[C@@H]1CC2([C@H](O2)C)C(=O)O[C@@H]3CCN(C/C=C(\C3=O)/COC(=O)[C@]1(C)O)C</chem>                                                               | Carcinogen     |
| 760 | Phenacetin                                               | 62-44-2    | <chem>CCOC1=CC=C(C=C1)NC(=O)C</chem>                                                                                                               | Carcinogen     |
| 761 | Phenazone                                                | 60-80-0    | <chem>CC1=CC(=O)N(N1C)C2=CC=CC=C2</chem>                                                                                                           | Carcinogen     |
| 762 | Phenazopyridine                                          | 136-40-3   | <chem>C1=CC=C(C=C1)N=NC2=C(N=C(C=C2)N)N</chem>                                                                                                     | Carcinogen     |
| 763 | Phenesterin                                              | 3546-10-9  | <chem>C[C@H](CCCC(C)C)[C@H]1CC[C@@H]2[C@@]1(CC[C@H]3[C@H]2CC=C4[C@@]3(CC[C@@H](C4)OC(=O)CC5=CC=C(C=C5)N(CCC1)CCC1)C)C</chem>                       | Carcinogen     |

|     |                                             |             |                                                                   |                |
|-----|---------------------------------------------|-------------|-------------------------------------------------------------------|----------------|
| 764 | Phenethyl isothiocyanate                    | 2257-09-2   | <chem>C1=CC=C(C=C1)CCN=C=S</chem>                                 | Non-Carcinogen |
| 765 | Phenformin                                  | 834-28-6    | <chem>C1=CC=C(C=C1)CCN=C(N)N=C(N)N</chem>                         | Non-Carcinogen |
| 766 | Phenobarbital                               | 50-06-6     | <chem>CCC1(C(=O)NC(=O)NC1=O)C2=CC=CC=C2</chem>                    | Non-Carcinogen |
| 767 | Phenobarbital                               | 57-30-7     | <chem>CCC1(C(=O)NC(=NC1=O)[O-])C2=CC=CC=C2</chem>                 | Carcinogen     |
| 768 | Phenol                                      | 108-95-2    | <chem>C1=CC=C(C=C1)O</chem>                                       | Non-Carcinogen |
| 769 | Phenolphthalein                             | 77-09-8     | <chem>C1=CC=C2C(=C1)C(=O)OC2(C3=CC=C(C=C3)O)C4=CC=C(C=C4)O</chem> | Carcinogen     |
| 770 | Phenoxybenzamine                            | 63-92-3     | <chem>CC(COC1=CC=CC=C1)N(CCC1)CC2=CC=CC=C2</chem>                 | Carcinogen     |
| 771 | 1-Phenyl-3,3-dimethyltriazene               | 7227-91-0   | <chem>CN(C)N=NC1=CC=CC=C1</chem>                                  | Carcinogen     |
| 772 | 1-Phenyl-3-methyl-5-pyrazolone              | 89-25-8     | <chem>CC1=NN(C(=O)C1)C2=CC=CC=C2</chem>                           | Non-Carcinogen |
| 773 | Phenyl-beta-naphthylamine                   | 135-88-6    | <chem>C1=CC=C(C=C1)NC2=CC3=CC=CC=C3C=C2</chem>                    | Non-Carcinogen |
| 774 | N-Phenyl-p-phenylenediamine                 | 2198-59-6   | <chem>C1=CC=C(C=C1)NC2=CC=C(C=C2)N</chem>                         | Non-Carcinogen |
| 775 | 2-Phenyl-1,3-propanediol dicarbamate        | 25451-15-4  | <chem>C1=CC=C(C=C1)C(COC(=O)N)COC(=O)N</chem>                     | Carcinogen     |
| 776 | (E)-7-Phenyl-7-(3-pyridyl)-6-heptenoic acid | 89667-40-3  | <chem>C1=CC=C(C=C1)/C(=C\CCCC(=O)O)/C2=CN=C(C=C2)</chem>          | Non-Carcinogen |
| 777 | 1-Phenyl-2-thiourea                         | 103-85-5    | <chem>C1=CC=C(C=C1)NC(=S)N</chem>                                 | Non-Carcinogen |
| 778 | 1-Phenylazo-2-naphthol                      | 842-07-9    | <chem>C1=CC=C(C=C1)N/N=C/2\C(=O)C=CC3=CC=CC=C32</chem>            | Carcinogen     |
| 779 | Phenylbutazone                              | 50-33-9     | <chem>CCCCC1C(=O)N(N(C1=O)C2=CC=CC=C2)C3=C(C=CC=C3)</chem>        | Carcinogen     |
| 780 | p-Phenylenediamine                          | 106-50-3    | <chem>C1=CC(=CC=C1N)N</chem>                                      | Non-Carcinogen |
| 781 | m-Phenylenediamine                          | 541-69-5    | <chem>C1=CC(=CC(=C1)N)N</chem>                                    | Non-Carcinogen |
| 782 | o-Phenylenediamine                          | 615-28-1    | <chem>C1=CC=C(C(=C1)N)N</chem>                                    | Carcinogen     |
| 783 | Phenylephrine                               | 61-76-7     | <chem>CNC[C@@H](C1=CC(=CC=C1)O)O</chem>                           | Non-Carcinogen |
| 784 | Phenylethyl-3-methylcaffeate                | 71835-85-3  | <chem>COC1=C(C=CC(=C1)/C=C/C(=O)O)CC2=CC=C(C=C2)O</chem>          | Non-Carcinogen |
| 785 | Phenylglycidyl ether                        | 122-60-1    | <chem>C1C(O1)COC2=CC=CC=C2</chem>                                 | Carcinogen     |
| 786 | 6-Phenylhexyl isothiocyanate                | 133920-06-6 | <chem>C1=CC=C(C=C1)CCCCCCN=C=S</chem>                             | Non-Carcinogen |
| 787 | o-Phenylphenol                              | 90-43-7     | <chem>C1=CC=C(C=C1)C2=CC=CC=C2O</chem>                            | Carcinogen     |

|     |                                     |             |                                                                                                                                                                         |                |
|-----|-------------------------------------|-------------|-------------------------------------------------------------------------------------------------------------------------------------------------------------------------|----------------|
| 788 | o-Phenylphenate                     | 132-27-4    | <chem>C1=CC=C(C=C1)C2=CC=CC=C2[O-]</chem>                                                                                                                               | Carcinogen     |
| 789 | 3-Phenylpropyl isothiocyanate       | 2627-27-2   | <chem>C1=CC=C(C=C1)CCCN=C=S</chem>                                                                                                                                      | Non-Carcinogen |
| 790 | PhIP                                | NOCAS       | <chem>CN1C2=C(N=CC(=C2)C3=CC=CC=C3)N=C1N</chem>                                                                                                                         | Carcinogen     |
| 791 | Phthalamide                         | 88-96-0     | <chem>C1=CC=C(C=C1)C(=O)N)C(=O)N</chem>                                                                                                                                 | Non-Carcinogen |
| 792 | Phthalic anhydride                  | 85-44-9     | <chem>C1=CC=C2C(=C1)C(=O)OC2=O</chem>                                                                                                                                   | Non-Carcinogen |
| 793 | Picloram                            | 1918-02-1   | <chem>C1(=C(C(=NC(=C1Cl)Cl)C(=O)O)Cl)N</chem>                                                                                                                           | Non-Carcinogen |
| 794 | Pilocarpine                         | 92-13-7     | <chem>CC[C@H]1[C@H](COC1=O)CC2=CN=CN2C</chem>                                                                                                                           | Non-Carcinogen |
| 795 | Pimaricin                           | 7681-93-8   | <chem>C[C@@H]1C/C=C/C=C/C=C/C=C/[C@@H](C[C@@H]2[C@@H]([C@H](C[C@](O2)(C[C@H](C[C@@H]3[C@H](O3)/C=C/C(=O)O1)O)O)C(=O)O)O[C@H]4[C@H]([C@H]([C@@H]([C@H](O4)C)O)N)O</chem> | Non-Carcinogen |
| 796 | Piperazine                          | 110-85-0    | <chem>C1CNCCN1</chem>                                                                                                                                                   | Non-Carcinogen |
| 797 | Piperidine                          | 110-89-4    | <chem>C1CCNCC1</chem>                                                                                                                                                   | Non-Carcinogen |
| 798 | Piperonyl butoxide                  | 51-03-6     | <chem>CCCCOCCOCCOCC1=CC2=C(C=C1CCC)OCO2</chem>                                                                                                                          | Carcinogen     |
| 799 | Piperonyl sulfoxide                 | 120-62-7    | <chem>CCCCCCCCS(=O)C(C)CC1=CC2=C(C=C1)OCO2</chem>                                                                                                                       | Non-Carcinogen |
| 800 | Pirmenol                            | 61477-94-9  | <chem>C[C@@H]1CCC[C@@H](N1CCCC(C2=CC=CC=C2)(C3=CC=CC=N3)O)C</chem>                                                                                                      | Non-Carcinogen |
| 801 | Piroxicam                           | 36322-90-4  | <chem>CN1C(=C(C2=CC=CC=C2S1(=O)=O)O)C(=O)NC3=CC=CC=N3</chem>                                                                                                            | Non-Carcinogen |
| 802 | Pivalolactone                       | 1955-45-9   | <chem>CC1(COC1=O)C</chem>                                                                                                                                               | Carcinogen     |
| 803 | 2,2',4,4',5,5'-Hexabromobiphenyl    | 67774-32-7  | <chem>C1=C(C(=CC(=C1Br)Br)Br)C2=CC(=C(C=C2Br)Br)Br</chem>                                                                                                               | Carcinogen     |
| 804 | Polybrominated biphenyls            | 59536-65-1  | <chem>C1=CC(=C(C(=C1C2=CC(=C(C(=C2)Br)Br)Br)Br)Br)Br</chem>                                                                                                             | Non-Carcinogen |
| 805 | 2-[2-(4-Nonylphenoxy)ethoxy]ethanol | 9016-45-9   | <chem>CCCCCCCCC1=CC=C(C=C1)OCCOCCO</chem>                                                                                                                               | Non-Carcinogen |
| 806 | Polysorbate 80                      | 9005-65-6   | <chem>CCCCCCCC/C=C/CCCCCCCC(=O)OCCOCC(C1C(CC(O1)OCCO)OCCO)OCCO</chem>                                                                                                   | Non-Carcinogen |
| 807 | Polyvinylpyridine-N-oxide           | 9045-81-2   | <chem>C=CC1=CC=CC=[N+]1[O-]</chem>                                                                                                                                      | Non-Carcinogen |
| 808 | Practolol                           | 6673-35-4   | <chem>CC(C)NCC(COC1=CC=C(C=C1)NC(=O)C)O</chem>                                                                                                                          | Non-Carcinogen |
| 809 | Pranlukast                          | 150821-03-7 | <chem>C1=CC=C(C=C1)CCCCOC2=CC=C(C=C2)C(=O)NC3=CC=CC4=C3OC(=CC4=O)C5=NNN=N5</chem>                                                                                       | Non-Carcinogen |
| 810 | Prazepam                            | 2955-38-6   | <chem>C1CC1CN2C(=O)CN=C(C3=C2C=CC(=C3)Cl)C4=CC=CC=C4</chem>                                                                                                             | Non-Carcinogen |
| 811 | Praziquantel                        | 55268-74-1  | <chem>C1CCC(CC1)C(=O)N2CC3C4=CC=CC=C4CCN3C(=O)C2</chem>                                                                                                                 | Non-Carcinogen |
| 812 | Prednimustine                       | 29069-24-7  | <chem>C[C@]12C[C@@H]([C@H]3[C@H]([C@@H]1C[C@@]2(C(=O)COC(=O)CCCC4=CC=C(C=C4)</chem>                                                                                     | Carcinogen     |

|     |                                          |            |                                                                                                                                             |                |
|-----|------------------------------------------|------------|---------------------------------------------------------------------------------------------------------------------------------------------|----------------|
|     |                                          |            | <chem>N(CCC1)CC(C1)O)CCC5=CC(=O)C=C[C@]35C)O</chem>                                                                                         |                |
| 813 | Prednisolone                             | 50-24-8    | <chem>C[C@]12C[C@@H]([C@H]3[C@H]([C@@H]1C</chem><br><chem>C[C@@]2(C(=O)CO)O)CCC4=CC(=O)C=C[C@]3</chem><br><chem>4C)O</chem>                 | Carcinogen     |
| 814 | Premarin                                 | 12126-59-9 | <chem>C[C@]12CC[C@H]3C(=CCC4=C3C=CC(=C4)OS(</chem><br><chem>=O)(=O)[O-])[C@@H]1CCC2=O</chem>                                                | Non-Carcinogen |
| 815 | Primidone                                | 125-33-7   | <chem>CCC1(C(=O)NCNC1=O)C2=CC=CC=C2</chem>                                                                                                  | Non-Carcinogen |
| 816 | Probenecid                               | 57-66-9    | <chem>CCCN(CCC)S(=O)(=O)C1=CC=C(C=C1)C(=O)O</chem>                                                                                          | Non-Carcinogen |
| 817 | Procarbazine                             | 671-16-9   | <chem>CC(C)NC(=O)C1=CC=C(C=C1)CNNC</chem>                                                                                                   | Carcinogen     |
| 818 | Procarbazine                             | 366-70-1   | <chem>CC(CN1C2=CC=CC=C2SC3=CC=CC=C31)N(C)C</chem>                                                                                           | Non-Carcinogen |
| 819 | Propane sultone                          | 1120-71-4  | <chem>C1COS(=O)(=O)C1</chem>                                                                                                                | Carcinogen     |
| 820 | beta-Propiolactone                       | 57-57-8    | <chem>C1COC1=O</chem>                                                                                                                       | Carcinogen     |
| 821 | Propranolol                              | 318-98-9   | <chem>CC(C)NCC(COC1=CC=CC2=CC=CC=C21)O</chem>                                                                                               | Non-Carcinogen |
| 822 | Propyl gallate                           | 121-79-9   | <chem>CCCOC(=O)C1=CC(=C(C(=C1)O)O)O</chem>                                                                                                  | Non-Carcinogen |
| 823 | N-Propyl-N'-nitro-<br>N-nitrosoguanidine | 13010-07-6 | <chem>CCCN(/C(=N/[N+](=O)[O-])/N)N=O</chem>                                                                                                 | Carcinogen     |
| 824 | N-Propyl-N-nitros<br>ourea               | 816-57-9   | <chem>CCCN(C(=O)N)N=O</chem>                                                                                                                | Carcinogen     |
| 825 | Propylene                                | 115-07-1   | <chem>CC(CO)O</chem>                                                                                                                        | Non-Carcinogen |
| 826 | Propylene glycol<br>mono-t-butyl ether   | 57018-52-7 | <chem>CC(COC(C)(C)C)O</chem>                                                                                                                | Non-Carcinogen |
| 827 | 1,2-Propylene<br>oxide                   | 75-56-9    | <chem>CC1CO1</chem>                                                                                                                         | Carcinogen     |
| 828 | Propylthiouracil                         | 51-52-5    | <chem>CCCC1=CC(=O)NC(=S)N1</chem>                                                                                                           | Carcinogen     |
| 829 | Proresid                                 | 1508-45-8  | <chem>CCNNC(=O)[C@H]1[C@@H]([C@H]([C@H](C2=CC3=</chem><br><chem>C(C=C2[C@H]1C4=CC(=C(C(=C4)OC)OC)OC)O</chem><br><chem>CO3)O)CO</chem>       | Non-Carcinogen |
| 830 | Protocatechuic<br>acid                   | 99-50-3    | <chem>C1=CC(=C(C=C1C(=O)O)O)O</chem>                                                                                                        | Non-Carcinogen |
| 831 | SX purple                                | 2611-82-7  | <chem>C1=CC=C2C(=C1)C(=CC=C2S(=O)(=O)[O-])N/N</chem><br><chem>=C/3C(=O)C=CC4=CC(=CC(=C43)S(=O)(=O)[O-</chem><br><chem>]S(=O)(=O)[O-]</chem> | Carcinogen     |
| 832 | Purpurin                                 | 81-54-9    | <chem>C1=CC=C2C(=C1)C(=O)C3=C(C2=O)C(=C(C=C3</chem><br><chem>O)O)O</chem>                                                                   | Carcinogen     |
| 833 | Pyrazinamide                             | 98-96-4    | <chem>C1=CN=C(C=N1)C(=O)N</chem>                                                                                                            | Non-Carcinogen |
| 834 | Pyridine                                 | 110-86-1   | <chem>C1=CC=NC=C1</chem>                                                                                                                    | Carcinogen     |
| 835 | Pyrilamine                               | 59-33-6    | <chem>CN(C)CCN(CC1=CC=C(C=C1)OC)C2=CC=CC=N</chem><br><chem>2</chem>                                                                         | Carcinogen     |
| 836 | Pyrimethamine                            | 58-14-0    | <chem>CCC1=C(C(=NC(=N1)N)N)C2=CC=C(C=C2)Cl</chem>                                                                                           | Non-Carcinogen |
| 837 | Quinapril                                | 82586-55-8 | <chem>CCOC(=O)[C@H](CCC1=CC=CC=C1)N[C@@H]</chem><br><chem>(C)C(=O)N2CC3=CC=CC=C3C[C@H]2C(=O)O</chem>                                        | Non-Carcinogen |
| 838 | p-Quinone dioxime                        | 105-11-3   | <chem>C1=CC(=CC=C1NO)N=O</chem>                                                                                                             | Carcinogen     |

|     |                     |             |                                                                                                                                                  |                |
|-----|---------------------|-------------|--------------------------------------------------------------------------------------------------------------------------------------------------|----------------|
| 839 | Ramosetron          | 132907-72-3 | <chem>CN1C=C(C2=CC=CC=C21)C(=O)[C@@H]3CCC4=C(C3)NC=N4</chem>                                                                                     | Non-Carcinogen |
| 840 | C.I. acid red 114   | 6459-94-5   | <chem>CC1=CC=C(C=C1)S(=O)(=O)OC2=CC=C(C=C2)N=NC3=C(C=C(C=C3))C4=CC(=C(C=C4))N/N=C/5\C(=O)C=CC6=CC(=CC(=C65))S(=O)(=O)[O-]S(=O)(=O)[O-]C)C</chem> | Carcinogen     |
| 841 | C.I. food red 3     | 3567-69-9   | <chem>C1=CC=C2C(=C1)C(=CC=C2S(=O)(=O)[O-])N/N=C\3/C=C(C4=CC=CC=C4C3=O)S(=O)(=O)[O-]</chem>                                                       | Non-Carcinogen |
| 842 | C.I. pigment red 3  | 2425-85-6   | <chem>CC1=CC(=C(C=C1))N/N=C/2\C(=O)C=CC3=CC=CC=C32][N+](=O)[O-]</chem>                                                                           | Carcinogen     |
| 843 | C.I. pigment red 23 | 6471-49-4   | <chem>COC1=C(C=C(C=C1))[N+](=O)[O-]N/N=C/2\C3=CC=CC=C3C=C(C2=O)C(=O)NC4=CC(=CC=C4)[N+](=O)[O-]</chem>                                            | Non-Carcinogen |
| 844 | D & C red no. 5     | 3761-53-3   | <chem>CC1=CC(=C(C=C1))N/N=C/2/C3=C(C=CC(=C3))S(=O)(=O)[O-]C=C(C2=O)S(=O)(=O)[O-]C</chem>                                                         | Carcinogen     |
| 845 | D & C red no. 10    | 1248-18-6   | <chem>C1=CC=C2C(=C1)C=CC(=C2S(=O)(=O)[O-])N/N=C/3\C(=O)C=CC4=CC=CC=C43</chem>                                                                    | Non-Carcinogen |
| 846 | FD & C red no. 1    | 3564-09-8   | <chem>CC1=CC(=C(C=C1C))N/N=C\2/C3=C(C=C(C=C3))S(=O)(=O)[O-]C=C(C2=O)S(=O)(=O)[O-]C</chem>                                                        | Carcinogen     |
| 847 | FD & C red no. 2    | 915-67-3    | <chem>C1=CC=C2C(=C1)C(=CC=C2S(=O)(=O)[O-])N/N=C\3/C4=C(C=C(C=C4))S(=O)(=O)[O-]C=C(C3=O)S(=O)(=O)[O-]</chem>                                      | Carcinogen     |
| 848 | FD & C red no. 3    | 16423-68-0  | <chem>C1=CC=C(C(=C1))C2=C3C=C(C(=O)C(=C3)OC4=C(C(=C(C=C24))I)[O-])I)I)C(=O)[O-]</chem>                                                           | Non-Carcinogen |
| 849 | FD & C red no. 4    | 4548-53-2   | <chem>CC1=CC(=C(C=C1N/N=C/2\C=C(C3=CC=CC=C3C2=O)S(=O)(=O)[O-])S(=O)(=O)[O-])C</chem>                                                             | Carcinogen     |
| 850 | Food red no. 106    | 3520-42-1   | <chem>CCN(CC)C1=C(C=C2C(=C1)OC3=CC(=[N+](CC)CC)C(=CC3=C2C4=C(C=C(C=C4))S(=O)(=O)[O-])S(=O)(=O)[O-])C)C</chem>                                    | Non-Carcinogen |
| 851 | HC red no. 3        | 2871-01-4   | <chem>C1=CC(=C(C=C1N))[N+](=O)[O-]NCCO</chem>                                                                                                    | Non-Carcinogen |
| 852 | Reserpine           | 50-55-5     | <chem>CO[C@H]1[C@@H](C[C@@H]2CN3CCCC4=C([C@H]3C[C@@H]2[C@@H]1C(=O)OC)NC5=C4C=CC(=C5)OC)OC(=O)C6=CC(=C(C(=C6)OC)OC)OC</chem>                      | Carcinogen     |
| 853 | Resorcinol          | 108-46-3    | <chem>C1=CC(=CC(=C1)O)O</chem>                                                                                                                   | Non-Carcinogen |
| 854 | Retinoic acid       | 302-79-4    | <chem>CC1=C(C(CCC1)(C)C)/C=C/C(=C/C=C/C(=C/C(=O)O)/C)/C</chem>                                                                                   | Non-Carcinogen |
| 855 | Retinol acetate     | 127-47-9    | <chem>CC1=C(C(CCC1)(C)C)/C=C/C(=C/C=C/C(=C/CO)C(=O)C)/C)/C</chem>                                                                                | Carcinogen     |
| 856 | Retinol palmitate   | 79-81-2     | <chem>CCCCCCCCCCCCCCCC(=O)OC/C=C(\C)/C=C/C(=C(\C)/C=C/C1=C(CCCC1(C)C)C</chem>                                                                    | Non-Carcinogen |
| 857 | Retrorsine          | 480-54-6    | <chem>C/C=C\1/C[C@H]([C@@])(C(=O)OCC2=CCN3[C</chem>                                                                                              | Carcinogen     |

|     |                                      |            |                                                                                                                                                                                    |                |
|-----|--------------------------------------|------------|------------------------------------------------------------------------------------------------------------------------------------------------------------------------------------|----------------|
|     |                                      |            | @H]2[C@@H](CC3)OC1=O)(CO)O)C                                                                                                                                                       |                |
| 858 | Rhodamine 6G                         | 989-38-8   | CCNC1=C(C=C2C(=C1)OC3=CC(=NCC)C(=CC3<br>=C2C4=CC=CC=C4C(=O)OCC)C)C                                                                                                                 | Non-Carcinogen |
| 859 | Riddelliine                          | 23246-96-0 | C/C=C\1/CC(=C)[C@@](C(=O)OCC2=CCN3[C@<br>H]2[C@@H](CC3)OC1=O)(CO)O                                                                                                                 | Carcinogen     |
| 860 | Rifampicin                           | 13292-46-1 | C[C@H]1/C=C/C=C\C(=O)NC\2=C(C3=C(C(=C4<br>C(=C3C(=O)/C2=C\NN5CCN(CC5)C)C(=O)[C@](<br>O4)(O/C=C/[C@@H]([C@H]([C@H]([C@@H]([<br>C@@H]([C@@H]([C@H]1O)C)O)C)OC(=O)C)C)<br>OC)C)O)O)/C | Non-Carcinogen |
| 861 | Ripazepam                            | 26308-28-1 | CCN1C2=C(C(=N1)C)NC(=O)CN=C2C3=CC=CC<br>=C3                                                                                                                                        | Non-Carcinogen |
| 862 | Rosaniline                           | 632-99-5   | CC1=CC(=C(C2=CC=C(C=C2)N)C3=CC=C(C=C3<br>)N)C=CC1=N                                                                                                                                | Non-Carcinogen |
| 863 | p-Rosaniline                         | 569-61-9   | C1=CC(=N)C=CC1=C(C2=CC=C(C=C2)N)C3=CC<br>=C(C=C3)N                                                                                                                                 | Carcinogen     |
| 864 | Rotenone                             | 83-79-4    | CC(=C)[C@H]1CC2=C(O1)C=CC3=C2O[C@@H]<br>4COC5=CC(=C(C=C5[C@@H]4C3=O)OC)OC                                                                                                          | Non-Carcinogen |
| 865 | Rutin                                | 153-18-4   | C[C@H]1[C@@H]([C@H]([C@H]([C@@H](O1)<br>OC[C@@H]2[C@H]([C@@H]([C@H]([C@@H](<br>O2)OC3=C(OC4=CC(=CC(=C4C3=O)O)O)C5=CC<br>(=C(C=C5)O)O)O)O)O)O)O                                     | Non-Carcinogen |
| 866 | Saccharin                            | 81-07-2    | C1=CC=C2C(=C1)C(=O)NS2(=O)=O                                                                                                                                                       | Non-Carcinogen |
| 867 | Saccharin                            | 6485-34-3  | C1=CC=C2C(=C1)C(=NS2(=O)=O)[O-]                                                                                                                                                    | Non-Carcinogen |
| 868 | Saccharin                            | 128-44-9   | C1=CC=C2C(=C1)C(=O)[N-]S2(=O)=O                                                                                                                                                    | Carcinogen     |
| 869 | Safrole                              | 94-59-7    | C=CCC1=CC2=C(C=C1)OCO2                                                                                                                                                             | Carcinogen     |
| 870 | Salbutamol                           | 18559-94-9 | CC(C)(C)NCC(C1=CC(=C(C=C1)O)CO)O                                                                                                                                                   | Carcinogen     |
| 871 | Salicylazosulfapyri<br>dine          | 599-79-1   | C1=CC=NC(=C1)NS(=O)(=O)C2=CC=C(C=C2)N/<br>N=C\3/C=CC(=O)C(=C3)C(=O)O                                                                                                               | Carcinogen     |
| 872 | Scopolamine                          | 6533-68-2  | CN1[C@@H]2CC(C[C@H]1[C@H]3[C@@H]2O<br>3)OC(=O)[C@@H](CO)C4=CC=CC=C4                                                                                                                | Non-Carcinogen |
| 873 | Senkirkine                           | 2318-18-5  | C/C=C\1/C[C@H]([C@@](C(=O)OC/C2=C/CN(C<br>C[C@H](C2=O)OC1=O)C)(C)O)C                                                                                                               | Carcinogen     |
| 874 | Sertraline                           | 79559-97-0 | CN[C@H]1CC[C@H](C2=CC=CC=C12)C3=CC(=<br>C(C=C3)Cl)Cl                                                                                                                               | Non-Carcinogen |
| 875 | Sesamol                              | 533-31-3   | C1OC2=C(O1)C=C(C=C2)O                                                                                                                                                              | Carcinogen     |
| 876 | Sodium<br>diethyldithiocarba<br>mate | 20624-25-3 | CCN(CC)C(=S)[S-]                                                                                                                                                                   | Non-Carcinogen |
| 877 | Sorbic acid                          | 110-44-1   | C/C=C/C=C/C(=O)O                                                                                                                                                                   | Non-Carcinogen |
| 878 | Sotalol                              | 959-24-0   | CC(C)NCC(C1=CC=C(C=C1)NS(=O)(=O)C)O                                                                                                                                                | Non-Carcinogen |
| 879 | Sterigmatocystin                     | 10048-13-2 | COC1=C2C(=C3C4C=COC4OC3=C1)OC5=C(C2=                                                                                                                                               | Carcinogen     |

|     |                                    |            |                                                                                                                                                                                                                    |                |
|-----|------------------------------------|------------|--------------------------------------------------------------------------------------------------------------------------------------------------------------------------------------------------------------------|----------------|
|     |                                    |            | <chem>O)C(=CC=C5)O</chem>                                                                                                                                                                                          |                |
| 880 | Stevioside                         | 57817-89-7 | <chem>C[C@@]12CCC[C@@]([C@H]1CC[C@]34[C@H]2CC[C@](C3)(C(=C)C4)O[C@H]5[C@@H]([C@H]([C@@H]([C@H](O5)CO)O)O)[C@H]6[C@@H]([C@H]([C@@H]([C@H](O6)CO)O)O)(C(=O)O[C@H]7[C@@H]([C@H]([C@@H]([C@H]([C@H](O7)CO)O)O)O</chem> | Non-Carcinogen |
| 881 | Streptozotocin                     | 18883-66-4 | <chem>CN(C(=O)N[C@@H]1[C@H]([C@@H]([C@H](O[C@@H]1O)CO)O)O)N=O</chem>                                                                                                                                               | Carcinogen     |
| 882 | Styrene                            | 100-42-5   | <chem>C=CC1=CC=CC=C1</chem>                                                                                                                                                                                        | Carcinogen     |
| 883 | trans-beta-Nitrostyrene            | 102-96-5   | <chem>C1=CC=C(C=C1)/C=C/[N+](=O)[O-]</chem>                                                                                                                                                                        | Non-Carcinogen |
| 884 | Styrene oxide                      | 96-09-3    | <chem>C1C(O1)C2=CC=CC=C2</chem>                                                                                                                                                                                    | Carcinogen     |
| 885 | Succinic anhydride                 | 108-30-5   | <chem>C1CC(=O)OC1=O</chem>                                                                                                                                                                                         | Non-Carcinogen |
| 886 | Sucrose acetate isobutyrate        | 126-13-6   | <chem>CC(C)C(=O)OC[C@@H]1[C@H]([C@@H]([C@](O1)(COC(=O)C)O[C@@H]2[C@@H]([C@H]([C@@H]([C@H](O2)COC(=O)C)OC(=O)C(C)C)OC(=O)C(C)C)OC(=O)C(C)C)OC(=O)C(C)C</chem>                                                       | Non-Carcinogen |
| 887 | Sulfallate                         | 95-06-7    | <chem>CCN(CC)C(=S)SCC(=C)Cl</chem>                                                                                                                                                                                 | Carcinogen     |
| 888 | Sulfisoxazole                      | 127-69-5   | <chem>CC1=C(ON=C1C)NS(=O)(=O)C2=CC=C(C=C2)N</chem>                                                                                                                                                                 | Non-Carcinogen |
| 889 | 3-Sulfolene                        | 77-79-2    | <chem>C1C=CCS1(=O)=O</chem>                                                                                                                                                                                        | Non-Carcinogen |
| 890 | 4,4'-Sulfonylbisacetanilide        | 77-46-3    | <chem>CC(=O)NC1=CC=C(C=C1)S(=O)(=O)C2=CC=C(C=C2)NC(=O)C</chem>                                                                                                                                                     | Carcinogen     |
| 891 | Sulindac sulfone                   | 59973-80-7 | <chem>CC\C1=C(C2=C(/C1=C\C3=CC=C(C=C3)S(=O)(=O)C)C=CC(=C2)F)CC(=O)O</chem>                                                                                                                                         | Non-Carcinogen |
| 892 | Suxibuzone                         | 27470-51-5 | <chem>CCCCC1(C(=O)N(N(C1=O)C2=CC=CC=C2)C3=C(C=CC=C3)COC(=O)CCC(=O)O</chem>                                                                                                                                         | Non-Carcinogen |
| 893 | Symphytine                         | 22571-95-5 | <chem>C/C=C(\C)/C(=O)O[C@@H]1CCN2[C@@H]1C(=CC2)COC(=O)C(C(C)C)(C(C)O)O</chem>                                                                                                                                      | Carcinogen     |
| 894 | Tace                               | 569-57-3   | <chem>COC1=CC=C(C=C1)C(=C(C2=CC=C(C=C2)OC)C1)C3=CC=C(C=C3)OC</chem>                                                                                                                                                | Non-Carcinogen |
| 895 | Taltirelin                         | NOCAS      | <chem>CN1C(=O)C[C@H](NC1=O)C(=O)N[C@@H](CC2=CN=CN2)C(=O)N3CCC[C@H]3C(=O)N</chem>                                                                                                                                   | Non-Carcinogen |
| 896 | Tamoxifen                          | 54965-24-1 | <chem>CC/C(=C(\C1=CC=CC=C1)/C2=CC=C(C=C2)OCN(C)C)/C3=CC=CC=C3</chem>                                                                                                                                               | Carcinogen     |
| 897 | Tegafur                            | 37076-68-9 | <chem>C1CC(OC1)N2C=C(C(=O)NC2=O)F</chem>                                                                                                                                                                           | Non-Carcinogen |
| 898 | Terbutaline                        | 23031-25-6 | <chem>CC(C)(C)NCC(C1=CC(=CC(=C1)O)O)O</chem>                                                                                                                                                                       | Carcinogen     |
| 899 | 3,3',4,4'-Tetraaminobiphenyl       | 7411-49-6  | <chem>C1=CC(=C(C=C1)C2=CC(=C(C=C2)N)N)N</chem>                                                                                                                                                                     | Carcinogen     |
| 900 | 2,3,5,6-Tetrachloro-4-nitroanisole | 2438-88-2  | <chem>COC1=C(C(=C(C(=C1Cl)Cl)[N+](=O)[O-])Cl)Cl</chem>                                                                                                                                                             | Non-Carcinogen |

|     |                                     |            |                                                                                                       |                |
|-----|-------------------------------------|------------|-------------------------------------------------------------------------------------------------------|----------------|
| 901 | 2,2',5,5'-Tetrachlorobenzidine      | 15721-02-5 | <chem>C1=C(C(=CC(=C1Cl)N)Cl)C2=CC(=C(C=C2Cl)N)Cl</chem>                                               | Non-Carcinogen |
| 902 | 2,3,7,8-Tetrachlorodibenzo-p-dioxin | 1746-01-6  | <chem>C1=C2C(=CC(=C1Cl)Cl)OC3=CC(=C(C=C3O2)Cl)Cl</chem>                                               | Carcinogen     |
| 903 | Tetracycline                        | 64-75-5    | <chem>C[C@@]1([C@H]2C[C@H]3[C@@H](C(=O)C(=C([C@]3(C(=O)C2=C(C4=C1C=CC=C4O)O)O)O)C(=O)N)N(C)C)O</chem> | Non-Carcinogen |
| 904 | Tetraethylthiuram disulfide         | 97-77-8    | <chem>CCN(CC)C(=S)SSC(=S)N(CC)CC</chem>                                                               | Non-Carcinogen |
| 905 | Tetrafluoro-m-phenylenediamine      | 63886-77-1 | <chem>C1(=C(C(=C(C(=C1F)F)F)N)F)N</chem>                                                              | Non-Carcinogen |
| 906 | Tetrahydro-2-nitroso-2H-1,2-oxazine | 40548-68-3 | <chem>C1CCON(C1)N=O</chem>                                                                            | Carcinogen     |
| 907 | 1-trans-delta9-Tetrahydrocannabinol | 1972-08-3  | <chem>CCCCC1=CC2=C([C@@H]3C=C(CC[C@H]3C(O2)(C)C)C(=C1)O</chem>                                        | Non-Carcinogen |
| 908 | Tetrahydrofuran                     | 109-99-9   | <chem>C1CCOC1</chem>                                                                                  | Carcinogen     |
| 909 | 3,4,5,6-Tetrahydrouridine           | 18771-50-1 | <chem>C1CN(C(=O)NC1=O)[C@H]2[C@@H]([C@@H]([C@H](O2)CO)O)O</chem>                                      | Non-Carcinogen |
| 910 | Tetramethylthiuram disulfide        | 137-26-8   | <chem>CN(C)C(=S)SSC(=S)N(C)C</chem>                                                                   | Non-Carcinogen |
| 911 | Thenyldiamine                       | 91-79-2    | <chem>CN(C)CCN(CC1=CSC=C1)C2=CC=CC=N2</chem>                                                          | Non-Carcinogen |
| 912 | Theophylline                        | 58-55-9    | <chem>CN1C2=C(C(=O)N(C1=O)C)NC=N2</chem>                                                              | Non-Carcinogen |
| 913 | Thiabendazole                       | 148-79-8   | <chem>C1=CC=C2C(=C1)NC(=N2)C3=CSC=N3</chem>                                                           | Non-Carcinogen |
| 914 | Thiamphenicol                       | 15318-45-3 | <chem>CS(=O)(=O)C1=CC=C(C=C1)[C@H]([C@@H](CO)NC(=O)C(Cl)Cl)O</chem>                                   | Non-Carcinogen |
| 915 | Thio-TEPA                           | 52-24-4    | <chem>C1CN1P(=S)(N2CC2)N3CC3</chem>                                                                   | Carcinogen     |
| 916 | 4,4'-Thiobis(6-tert-butyl-m-cresol) | 96-69-5    | <chem>CC1=CC(=C(C=C1SC2=CC(=C(C=C2)O)C(C)(C)C)C(C)(C)C)O</chem>                                       | Non-Carcinogen |
| 917 | 4,4'-Thiodianiline                  | 139-65-1   | <chem>C1=CC(=CC=C1N)SC2=CC=C(C=C2)N</chem>                                                            | Carcinogen     |
| 918 | beta-Thioguanine deoxyriboside      | 789-61-7   | <chem>C1[C@@H]([C@H](O[C@H]1N2C=NC3=C2NC(=NC3=S)N)CO)O</chem>                                         | Carcinogen     |
| 919 | Thiouracil                          | 141-90-2   | <chem>C1=CNC(=S)NC1=O</chem>                                                                          | Carcinogen     |
| 920 | Tilidine fumarate                   | 55567-81-2 | <chem>CCOC(=O)[C@@]1(CCC=C[C@H]1N(C)C)C2=C=C=CC=C2</chem>                                             | Non-Carcinogen |
| 921 | Tilisolol                           | 62774-96-3 | <chem>CC(C)(C)NCC(COC1=CN(C(=O)C2=CC=CC=C2)C)O</chem>                                                 | Non-Carcinogen |
| 922 | dl-alpha-Tocopherol                 | 10191-41-0 | <chem>CC1=C(C(=C2CCC(OC2=C1C)(C)CCCC(C)CCCC(C)CCCC(C)C)O</chem>                                       | Non-Carcinogen |
| 923 | dl-alpha-Tocopheryl acetate         | 7695-91-2  | <chem>CC1=C2C(=C(C(=C1)OC(=O)C)C)CCC(O2)(C)CCCC(C)CCCC(C)CCCC(C)C</chem>                              | Non-Carcinogen |
| 924 | Tolazamide                          | 1156-19-0  | <chem>CC1=CC=C(C=C1)S(=O)(=O)NC(=O)NN2CCCCC2</chem>                                                   | Non-Carcinogen |





|     |                                                                       |             |                                                                       |                |
|-----|-----------------------------------------------------------------------|-------------|-----------------------------------------------------------------------|----------------|
| 950 | Trifluralin                                                           | 1582-09-8   | <chem>CCCN(CCC)C1=C(C=C(C=C1[N+](=O)[O-])C(F)(F)F)[N+](=O)[O-]</chem> | Non-Carcinogen |
| 951 | Trimethadione                                                         | 127-48-0    | <chem>CC1(C(=O)N(C(=O)O1)C)C</chem>                                   | Non-Carcinogen |
| 952 | (+/-)-7-(3,5,6-trimethyl-1,4-benzoquinon-2-yl)-7-phenylheptanoic acid | 112665-43-7 | <chem>CC1=C(C(=O)C(=C(C1=O)C)C(CCCCCC(=O)O)C2=CC=CC=C2)C</chem>       | Non-Carcinogen |
| 953 | 2,4,5-Trimethylaniline                                                | 137-17-7    | <chem>CC1=CC(=C(C=C1)C)N)C</chem>                                     | Carcinogen     |
| 954 | 2,4,5-Trimethylaniline                                                | 21436-97-5  | <chem>CC1=CC(=C(C(=C1)C)N)C</chem>                                    | Carcinogen     |
| 955 | 1,2,4-Trimethylbenzene                                                | 95-63-6     | <chem>CC1=CC(=C(C=C1)C)C</chem>                                       | Carcinogen     |
| 956 | Trimethylphosphate                                                    | 512-56-1    | <chem>COP(=O)(OC)OC</chem>                                            | Non-Carcinogen |
| 957 | Trimethylthiourea                                                     | 2489-77-2   | <chem>CNC(=S)N(C)C</chem>                                             | Carcinogen     |
| 958 | 1,3,5-Trinitrobenzene                                                 | 99-35-4     | <chem>C1=C(C=C(C=C1[N+](=O)[O-])[N+](=O)[O-])[N+](=O)[O-]</chem>      | Non-Carcinogen |
| 959 | Trinitroglycerin                                                      | 55-63-0     | <chem>C(C(CO[N+](=O)[O-])O[N+](=O)[O-])O[N+](=O)[O-]</chem>           | Carcinogen     |
| 960 | Triphenyltin hydroxide                                                | 76-87-9     | <chem>C1=CC=C(C=C1)[Sn](C2=CC=CC=C2)C3=CC=C(C=C3)O</chem>             | Non-Carcinogen |
| 961 | Triprolidine monohydrate                                              | 6138-79-0   | <chem>CC1=CC=C(C=C1)/C(=C\CN2CCCC2)/C3=CC=C(C=N3)O</chem>             | Non-Carcinogen |
| 962 | Tris(2-chloroethyl)phosphate                                          | 115-96-8    | <chem>C(CCl)OP(=O)(OCCCl)OCCCl</chem>                                 | Carcinogen     |
| 963 | Tris(2,3-dibromopropyl)phosphate                                      | 126-72-7    | <chem>C(C(CBr)Br)OP(=O)(OCC(CBr)Br)OCC(CBr)Br</chem>                  | Carcinogen     |
| 964 | Tris-(1,3-dichloro-2-propyl)phosphate                                 | 13674-87-8  | <chem>C(C(CCl)OP(=O)(OC(CCl)CCl)OC(CCl)CCl)Cl</chem>                  | Carcinogen     |
| 965 | Tris(2-ethylhexyl)phosphate                                           | 78-42-2     | <chem>CCCCC(CC)COP(=O)(OCC(CC)CCCC)OCC(CC)CCCC</chem>                 | Non-Carcinogen |
| 966 | Tris(2-hydroxypropyl)amine                                            | 122-20-3    | <chem>CC(CN(CC(C)O)CC(C)O)O</chem>                                    | Non-Carcinogen |
| 967 | N-Tritriacontane-1,6,18-dione                                         | 24514-86-1  | <chem>CCCCCCCCCCCCCCCC(=O)CC(=O)CCCCCCCCCCCCCCCC</chem>               | Non-Carcinogen |
| 968 | Trp-P-1 acetate                                                       | 75104-43-7  | <chem>CC1=C(N=C(C2=C1NC3=CC=CC=C32)C)N</chem>                         | Carcinogen     |
| 969 | Trp-P-2 acetate                                                       | 72254-58-1  | <chem>CC1=C2C3=CC=CC=C3NC2=CC(=N1)N</chem>                            | Carcinogen     |
| 970 | dl-Tryptophan                                                         | 54-12-6     | <chem>C1=CC=C2C(=C1)C(=CN2)CC(C(=O)O)N</chem>                         | Non-Carcinogen |
| 971 | l-Tryptophan                                                          | 73-22-3     | <chem>C1=CC=C2C(=C1)C(=CN2)C[C@@H](C(=O)O)N</chem>                    | Non-Carcinogen |
| 972 | Uracil                                                                | 66-22-8     | <chem>C1=CNC(=O)NC1=O</chem>                                          | Carcinogen     |
| 973 | Urapidil                                                              | 34661-75-1  | <chem>CN1C(=CC(=O)N(C1=O)C)NCCCN2CCN(CC2)C</chem>                     | Non-Carcinogen |

|     |                                      |             |                                                                                                                                  |                |
|-----|--------------------------------------|-------------|----------------------------------------------------------------------------------------------------------------------------------|----------------|
|     |                                      |             | <chem>3=CC=CC=C3OC</chem>                                                                                                        |                |
| 974 | Urethane                             | 51-79-6     | <chem>CCOC(=O)N</chem>                                                                                                           | Carcinogen     |
| 975 | Vinyl acetate                        | 108-05-4    | <chem>CC(=O)OC=C</chem>                                                                                                          | Carcinogen     |
| 976 | 3-Methylstyrene                      | 100-80-1    | <chem>CC1=CC=CC(=C1)C=C</chem>                                                                                                   | Non-Carcinogen |
| 977 | N-Vinylpyrrolidone-2                 | 88-12-0     | <chem>C=CN1CCCC1=O</chem>                                                                                                        | Carcinogen     |
| 978 | FD & C violet no. 1                  | 1694-09-3   | <chem>CCN(CC1=CC(=CC=C1)S(=O)(=O)[O-])C2=CC=C(C=C2)C(=C3C=CC(=[N+](C)C)C=C3)C4=CC=C(C=C4)N(CC)CC5=CC(=CC=C5)S(=O)(=O)[O-]</chem> | Carcinogen     |
| 979 | Voglibose                            | 83480-29-9  | <chem>C1[C@@H]([C@@H]([C@H]([C@@H]([C@H]1(CO)O)O)O)NC(CO)CO</chem>                                                               | Non-Carcinogen |
| 980 | Watanidipine                         | 133743-71-2 | <chem>CC1=C(C(C(=C(N1)C)C(=O)OCCC2=CC=C(C=C2)N3CCN(CC3)C(C4=CC=CC=C4)C5=CC=CC=C5)C6=CC(=CC=C6)[N+](=O)[O-])C(=O)OC</chem>        | Non-Carcinogen |
| 981 | Xylazine                             | 23076-35-9  | <chem>CC1=C(C(=CC=C1)C)NC2=NCCCS2</chem>                                                                                         | Non-Carcinogen |
| 982 | 2,4-Xylidine                         | 21436-96-4  | <chem>CC1=CC(=C(C=C1)N)C</chem>                                                                                                  | Non-Carcinogen |
| 983 | 2,5-Xylidine                         | 51786-53-9  | <chem>CC1=CC(=C(C=C1)C)N</chem>                                                                                                  | Carcinogen     |
| 984 | C.I. disperse yellow 3               | 2832-40-8   | <chem>CC1=C/C(=N/NC2=CC=C(C=C2)NC(=O)C)/C(=O)C=C1</chem>                                                                         | Carcinogen     |
| 985 | C.I. pigment yellow 12               | 6358-85-6   | <chem>CC(=O)C(C(=O)NC1=CC=CC=C1)N=NC2=C(C=C(C=C2)C3=CC(=C(C=C3)N=NC(C(=O)C)C(=O)NC4=CC=CC=C4)Cl)Cl</chem>                        | Non-Carcinogen |
| 986 | C.I. pigment yellow 16               | 5979-28-2   | <chem>CC1=C(C=CC(=C1)C2=CC(=C(C=C2)NC(=O)C(C(=O)C)N=NC3=C(C=C(C=C3)Cl)Cl)C)NC(=O)C(C(=O)C)N=NC4=C(C=C(C=C4)Cl)Cl</chem>          | Non-Carcinogen |
| 987 | C.I. pigment yellow 83               | 5567-15-7   | <chem>CC(=O)C(C(=O)NC1=CC(=C(C=C1OC)Cl)OC)N=NC2=C(C=C(C=C2)C3=CC(=C(C=C3)N=NC(C(=O)C)C(=O)NC4=CC(=C(C=C4OC)Cl)OC)Cl)Cl</chem>    | Non-Carcinogen |
| 988 | C.I. vat yellow 4                    | 128-66-5    | <chem>C1=CC=C2C(=C1)C3=C4C(=CC=C5C4=C(C=C3)C(=O)C6=CC=CC=C65)C2=O</chem>                                                         | Non-Carcinogen |
| 989 | FD & C yellow no. 5                  | 1934-21-0   | <chem>C1=CC(=CC=C1N/N=C\2/C(=NN(C2=O)C3=CC=C(C=C3)S(=O)(=O)[O-])C(=O)[O-])S(=O)(=O)[O-]</chem>                                   | Non-Carcinogen |
| 990 | FD & C yellow no. 6                  | 2783-94-0   | <chem>C1=CC(=CC=C1N/N=C\2/C3=C(C=CC2=O)C=C(C=C3)S(=O)(=O)[O-])S(=O)(=O)[O-]</chem>                                               | Non-Carcinogen |
| 991 | HC yellow 4                          | 59820-43-8  | <chem>C1=CC(=C(C=C1[N+](=O)[O-])OCCO)NCCO</chem>                                                                                 | Non-Carcinogen |
| 992 | Zatoseptron maleate                  | 123482-23-5 | <chem>CC1(CC2=C(O1)C(=CC(=C2)Cl)C(=O)NC3C[C@H]4CCC(C3)N4C)C</chem>                                                               | Non-Carcinogen |
| 993 | Zearalenone                          | 17924-92-4  | <chem>C[C@H]1CCCC(=O)CCC/C=C/C2=CC(=CC(=C2)C(=O)O1)O</chem>                                                                      | Non-Carcinogen |
| 994 | 2,2-Bis(bromomethyl)-1,3-propanediol | 3296-90-0   | <chem>C(C(CO)(CBr)CBr)O</chem>                                                                                                   | Carcinogen     |

|      |                                             |            |                                                                                                                                                                           |                |
|------|---------------------------------------------|------------|---------------------------------------------------------------------------------------------------------------------------------------------------------------------------|----------------|
| 995  | C.I. direct blue 218                        | 28407-37-6 | <chem>C1=CC(=C(C=C1C2=CC(=C(C=C2)N/N=C/3\C(=O)C4=C(C=C(C=C4C=C3S(=O)(=O)[O-])S(=O)(=O)[O-])N)O)O)N/N=C/5\C(=O)C6=C(C=C(C=C6C=C5S(=O)(=O)[O-])S(=O)(=O)[O-])N</chem>       | Carcinogen     |
| 996  | C.I. direct brown 95                        | 16071-86-6 | <chem>C1=CC(=CC=C1C2=CC=C(C=C2)N=NC3=CC(=C(C=C3)[O-])C(=O)[O-])N/N=C/4\C(=O)C=C/C(=N\NC5=C(C=CC(=C5)S(=O)(=O)[O-])[O-])/C4=O</chem>                                       | Carcinogen     |
| 997  | 1,3-Butadiene                               | 106-99-0   | <chem>C=CC=C</chem>                                                                                                                                                       | Carcinogen     |
| 998  | Calcium lactate                             | 814-80-2   | <chem>CC(C(=O)[O-])O</chem>                                                                                                                                               | Non-Carcinogen |
| 999  | Calcium valproate                           | 33433-82-8 | <chem>CCCC(CCC)C(=O)[O-]</chem>                                                                                                                                           | Carcinogen     |
| 1000 | Propylene                                   | 115-07-1   | <chem>CC=C</chem>                                                                                                                                                         | Non-Carcinogen |
| 1001 | Chlorin E6                                  | 19660-77-6 | <chem>CCC1=C(C2=CC3=NC(=CC4=NC(=C(C5=NC(=C(C5=C([O-])[O-])C)C=C1[N-]2)CC(=O)[O-])[C@H]([C@@H]4C)CCC(=O)[O-])C(=C3C=C)C)C</chem>                                           | Non-Carcinogen |
| 1002 | Tetrakis(hydroxymethyl)phosphonium chloride | 124-64-1   | <chem>C(O)[P+](CO)(CO)CO</chem>                                                                                                                                           | Non-Carcinogen |
| 1003 | Vinblastine                                 | 865-21-4   | <chem>CC[C@@]1(C[C@@H]2C[C@@](C3=C(CCN(C2)C1)C4=CC=CC=C4N3)(C5=C(C=C6C(=C5)[C@]78CCN9[C@H]7[C@@](C=CC9)([C@H]([C@@](C[C@@H]8N6C)(C(=O)OC)O)OC(=O)C)CC)OC)C(=O)OC)O</chem> | Non-Carcinogen |

**Supplementary Table S3:** Detailed information for the compounds in the external validation dataset from the ISSCAN database

| Index | Name                                      | CAS        | SMILES                                                                                                              | Class          |
|-------|-------------------------------------------|------------|---------------------------------------------------------------------------------------------------------------------|----------------|
| 1     | 2-Ethylhexyl Sulfate                      | 126-92-1   | <chem>CCCCCC(CC)COS(=O)(=O)[O-]</chem>                                                                              | Non-Carcinogen |
| 2     | Bis(2-chloroethyl) ether                  | 111-44-4   | <chem>C1CCOCCCl</chem>                                                                                              | Non-Carcinogen |
| 3     | Diethanolamine                            | 111-42-2   | <chem>OCCNCCO</chem>                                                                                                | Non-Carcinogen |
| 4     | Benzethonium Chloride                     | 121-54-0   | <chem>O(c1ccc(cc1)C(C)(C)CC(C)(C)C)CCOCC[N+](Cc1ccccc1)(C)C</chem>                                                  | Non-Carcinogen |
| 5     | 2-tert-Butylhydroquinone                  | 1948-33-0  | <chem>Oc1c(cc(O)cc1)C(C)(C)C</chem>                                                                                 | Non-Carcinogen |
| 6     | Sodium Xylenesulfonate                    | 1300-72-7  | <chem>[O-]S(=O)(=O)c1cc(C)cc(C)c1</chem>                                                                            | Non-Carcinogen |
| 7     | Diethyl Phthalat                          | 84-66-2    | <chem>O=C(OCC)c1c(cccc1)C(=O)OCC</chem>                                                                             | Non-Carcinogen |
| 8     | Allyl Chloride                            | 107-05-1   | <chem>C=CCCl</chem>                                                                                                 | Non-Carcinogen |
| 9     | Acifluorfen                               | 50594-66-6 | <chem>OC(=O)c1c(ccc(c1)Oc1ccc(cc1Cl)C(F)(F)F)[N+](=O)[O-]</chem>                                                    | Non-Carcinogen |
| 10    | alpha-(2,4-Dichlorophenoxy)propionic acid | 120-36-5   | <chem>Clc1c(ccc(c1)Cl)O[C@@H](C(=O)O)C</chem>                                                                       | Non-Carcinogen |
| 11    | l-Glutamic acid                           | 56-86-0    | <chem>N[C@H](CCC(=O)O)C(=O)O</chem>                                                                                 | Non-Carcinogen |
| 12    | Isomalt                                   | 64519-82-0 | <chem>[C@@H]1(O[C@@H]([C@H]([C@@H]([C@H]1O)O)O)CO)OC[C@H]([C@H]([C@@H]([C@H](CO)O)O)O)O</chem>                      | Non-Carcinogen |
| 13    | p-Methylstyrene                           | 622-97-9   | <chem>C=Cc1ccc(cc1)C</chem>                                                                                         | Non-Carcinogen |
| 14    | dl-Monosodium glutamate                   | 617-65-2   | <chem>O=C(C(CCC(=O)O)N)O</chem>                                                                                     | Non-Carcinogen |
| 15    | Nitrosomethylphenidate                    | 55557-03-4 | <chem>c1ccc(C(C(=O)OC)C2N(N=O)CCCC2)cc1</chem>                                                                      | Non-Carcinogen |
| 16    | Simazine                                  | 122-34-9   | <chem>Clc1nc(nc(n1)NCC)NCC</chem>                                                                                   | Non-Carcinogen |
| 17    | Temazepam                                 | 846-50-4   | <chem>CN1c2ccc(cc2C(=NC(C1=O)O)c1ccccc1)Cl</chem>                                                                   | Non-Carcinogen |
| 18    | 4-Nitroquinoline-N-Oxide                  | 56-57-5    | <chem>N(=O)(=O)c1cc[n+](([O-])c2ccccc12</chem>                                                                      | Carcinogen     |
| 19    | Methylazoxymethanol Acetate               | 592-62-1   | <chem>CC(=O)OCN=N(=O)C</chem>                                                                                       | Carcinogen     |
| 20    | D&C Red no. 9                             | 1190723    | <chem>Clc1cc(c(/N=N/c2c3ccccc3ccc2O)cc1C)S(=O)(=O)[O-]</chem>                                                       | Carcinogen     |
| 21    | Chlornaphazine                            | 494-03-1   | <chem>C1CCN(CC(Cl)c1ccc2ccccc2c1</chem>                                                                             | Carcinogen     |
| 22    | Adriamycin                                | 23214-92-8 | <chem>O=C1c2c(O)c3c(c(O)c2C(=O)c2cccc(OC)c12)C[C@@](O)(C(=O)CO)C[C@@H]3O[C@@H]1O[C@H]([C@@H](O)[C@@H](N)C1)C</chem> | Carcinogen     |

|    |                                               |            |                                                                                   |            |
|----|-----------------------------------------------|------------|-----------------------------------------------------------------------------------|------------|
| 23 | Diethyl Sulfate                               | 64-67-5    | <chem>O=S(=O)(OCC)OCC</chem>                                                      | Carcinogen |
| 24 | Ethyl Methanesulfonate                        | 62-50-0    | <chem>O=S(=O)(OCC)C</chem>                                                        | Carcinogen |
| 25 | Methylthiouracil                              | 56-04-2    | <chem>O=C1C=C(NC(N1)=S)C</chem>                                                   | Carcinogen |
| 26 | 2-Amino-3-methyl-9H-pyrido[2,3-b]indole       | 68006-83-7 | <chem>n1c(c(cc2c3c(cccc3)[nH]c12)C)N</chem>                                       | Carcinogen |
| 27 | N-Nitroso-2,6-dimethylmorpholine              | 1456-28-6  | <chem>O=NN1C[C@@H](O[C@@H](C)C1)C</chem>                                          | Carcinogen |
| 28 | 9,10-Anthraquinone                            | 84-65-1    | <chem>O=C1c2c(cccc2)C(=O)c2c1cccc2</chem>                                         | Carcinogen |
| 29 | N-nitroso-1,3-oxazolidine                     | 39884-52-1 | <chem>C1N(COC1)N=O</chem>                                                         | Carcinogen |
| 30 | D & C yellow no. 11                           | 8003-22-3  | <chem>c1ccc2nc(C3C(=O)c4ccccc4C3=O)ccc2c1</chem>                                  | Carcinogen |
| 31 | 2,3-dibromo-1-propanol                        | 96-13-9    | <chem>OCC(Br)CBr</chem>                                                           | Carcinogen |
| 32 | 1,2-Dihydro-2,2,4-trimethylquinoline          | 147-47-7   | <chem>N1c2c(C(=CC1(C)C)C)cccc2</chem>                                             | Carcinogen |
| 33 | beta-2'-Deoxythioguanosine                    | 789-61-7   | <chem>C1[C@@H]([C@H](O[C@H]1N2C=NC3=C2NC(=NC3=S)N)CO)O</chem>                     | Carcinogen |
| 34 | Biphenyl                                      | 92-52-4    | <chem>C1=CC=C(C=C1)C2=CC=CC=C2</chem>                                             | Carcinogen |
| 35 | 7,12-Dimethylbenz(a)anthracene                | 57-97-6    | <chem>Cc1c2cccc2c(c2ccc3c(c12)cccc3)C</chem>                                      | Carcinogen |
| 36 | Isosafrole                                    | 120-58-1   | <chem>C/C=C/c1cc2c(cc1)OCO2</chem>                                                | Carcinogen |
| 37 | Mestranol                                     | 72-33-3    | <chem>C[C@@]12[C@]([C@]3([C@@](c4c(cc(cc4)OC)CC3)(CC1)C)C)(CC[C@]2(O)C#C)C</chem> | Carcinogen |
| 38 | N-Nitrosomethyl-(2-tosyloxyethyl)amine        | NOCAS      | <chem>NC(COS(=O)(=O)c1ccc(C)cc1)CN=O</chem>                                       | Carcinogen |
| 39 | Norethynodrel                                 | 68-23-5    | <chem>C[C@@]12C(C3C(C4=C(CC(=O)CC4)CC3)CC1)CC[C@@]2(C#C)O</chem>                  | Carcinogen |
| 40 | N,N,N'-trimethyl-N'-nitroso-1,2-ethanediamine | 23834-30-2 | <chem>CN(C)CCN(C)N=O</chem>                                                       | Carcinogen |
